# Supplementary material
Source: publisher figshare collection journal article supplement (https://acs.figshare.com/ndownloader/files/3780499)
Supplement: Supplementary file 1 [file 3780499]

## Sheet: Supplementary_Table S1
Candidate Ligand	Reference Ligand	Passed Lilly medchem rules?	RMSD, Top pose	Glide RMSD, Top pose	MCS similarity	MCS	Natoms MCS region	Entrez_Gene_ID	Gene Symbol	family
1ndy	1o5r	Yes	2.426	1.69359	0.428571	OC[C@H]([n]1cc([n]c1)C(=O)N)C	12	280712	ADA	other
1o5r	1ndy	Yes	0.681428	1.61466	0.428571	OC[C@H]([n]1cc([n]c1)C(=O)N)C	12	280712	ADA	other
1ndy	2e1w	Yes	0.0465011	2.01153	0.510638	OC[C@H]([n]1cc([n]c1)C(=O)N)C	12	280712	ADA	other
2e1w	1ndy	Yes	0.0118216	2.44173	0.510638	OC[C@H]([n]1cc([n]c1)C(=O)N)C	12	280712	ADA	other
1qxl	2e1w	Yes	0.975098	1.47523	0.40678	OC[C@H]([n]1cc([n]c1)C(=O)N)C	12	280712	ADA	other
2e1w	1qxl	Yes	0.00173205	8.05726	0.40678	OC[C@H]([n]1cc([n]c1)C(=O)N)C	12	280712	ADA	other
1qxl	1v79	Yes	1.18078	2.27472	0.421053	OC[C@H]([n]1cc([n]c1)C(=O)N)C	12	280712	ADA	other
1v79	1qxl	Yes	0.0107196	1.32702	0.421053	OC[C@H]([n]1cc([n]c1)C(=O)N)C	12	280712	ADA	other
1uml	1ndy	Yes	0.861384	1.12025	0.428571	OC[C@H]([n]1cc([n]c1)C(=O)N)C	12	280712	ADA	other
1ndy	1uml	Yes	0.00847246	7.1581	0.428571	OC[C@H]([n]1cc([n]c1)C(=O)N)C	12	280712	ADA	other
1o5r	1qxl	Yes	0.569459	1.79133	0.411765	OCCCC[n]1c2c(cc1)cccc2	14	280712	ADA	other
1qxl	1o5r	Yes	0.951693	1.65733	0.411765	OCCCC[n]1c2c(cc1)cccc2	14	280712	ADA	other
1ndw	1ndy	Yes	1.30722	8.25471	0.571429	OC[C@H]([n]1cc([n]c1)C(=O)N)C	12	280712	ADA	other
1ndy	1ndw	Yes	2.17935	1.71453	0.571429	OC[C@H]([n]1cc([n]c1)C(=O)N)C	12	280712	ADA	other
1o5r	1v7a	Yes	1.15697	1.85865	0.413793	OC[C@H]([n]1cc([n]c1)C(=O)N)C	12	280712	ADA	other
1v7a	1o5r	Yes	3.46589	5.3191	0.413793	OC[C@H]([n]1cc([n]c1)C(=O)N)C	12	280712	ADA	other
2e1w	1v7a	Yes	0.00858536	2.61216	0.489796	OC[C@H]([n]1cc([n]c1)C(=O)N)C	12	280712	ADA	other
1v7a	2e1w	Yes	2.01614	2.16679	0.489796	OC[C@H]([n]1cc([n]c1)C(=O)N)C	12	280712	ADA	other
1ndw	1v7a	Yes	1.38637	5.66756	0.545455	OC[C@H]([n]1cc([n]c1)C(=O)N)C	12	280712	ADA	other
1v7a	1ndw	Yes	2.25563	2.43902	0.545455	OC[C@H]([n]1cc([n]c1)C(=O)N)C	12	280712	ADA	other
1o5r	2e1w	Yes	0.0159231	1.84939	0.421053	OC[C@H]([n]1cc([n]c1)C(=O)N)C	12	280712	ADA	other
2e1w	1o5r	Yes	2.30788	6.02345	0.421053	OC[C@H]([n]1cc([n]c1)C(=O)N)C	12	280712	ADA	other
1ndw	1qxl	Yes	1.27494	8.70868	0.444444	OC[C@H]([n]1cc([n]c1)C(=O)N)C	12	280712	ADA	other
1qxl	1ndw	Yes	7.35066	6.16849	0.444444	OC[C@H]([n]1cc([n]c1)C(=O)N)C	12	280712	ADA	other
1ndw	2e1w	Yes	1.38432	2.96017	0.55814	OC[C@H]([n]1cc([n]c1)C(=O)N)C	12	280712	ADA	other
2e1w	1ndw	Yes	2.15119	1.94776	0.55814	OC[C@H]([n]1cc([n]c1)C(=O)N)C	12	280712	ADA	other
1uml	1v79	Yes	8.796	1.35991	0.436364	OC[C@H]([n]1cc([n]c1)C(=O)N)C	12	280712	ADA	other
1v79	1uml	Yes	0.00915771	1.45237	0.436364	OC[C@H]([n]1cc([n]c1)C(=O)N)C	12	280712	ADA	other
1ndy	1v79	Yes	2.54468	5.43437	0.533333	OC[C@H]([n]1cc([n]c1)C(=O)N)C	12	280712	ADA	other
1v79	1ndy	Yes	0.00389639	2.2183	0.533333	OC[C@H]([n]1cc([n]c1)C(=O)N)C	12	280712	ADA	other
1uml	1v7a	Yes	1.31009	1.28005	0.413793	OC[C@H]([n]1cc([n]c1)C(=O)N)C	12	280712	ADA	other
1v7a	1uml	Yes	4.51809	5.39351	0.413793	OC[C@H]([n]1cc([n]c1)C(=O)N)C	12	280712	ADA	other
1ndy	1v7a	Yes	2.31769	5.08634	0.5	OC[C@H]([n]1cc([n]c1)C(=O)N)C	12	280712	ADA	other
1v7a	1ndy	Yes	0.00830662	2.4136	0.5	OC[C@H]([n]1cc([n]c1)C(=O)N)C	12	280712	ADA	other
1qxl	1v7a	Yes	6.68381	1.8907	0.4	OC[C@H]([n]1cc([n]c1)C(=O)N)C	12	280712	ADA	other
1v7a	1qxl	Yes	4.11596	6.22385	0.4	OC[C@H]([n]1cc([n]c1)C(=O)N)C	12	280712	ADA	other
1ndy	1qxl	Yes	0.0371934	1.77861	0.413793	OC[C@H]([n]1cc([n]c1)C(=O)N)C	12	280712	ADA	other
1qxl	1ndy	Yes	10.0199	1.34593	0.413793	OC[C@H]([n]1cc([n]c1)C(=O)N)C	12	280712	ADA	other
1o5r	1v79	Yes	0.480995	6.82449	0.436364	OC[C@H]([n]1cc([n]c1)C(=O)N)C	12	280712	ADA	other
1v79	1o5r	Yes	1.75547	2.24107	0.436364	OC[C@H]([n]1cc([n]c1)C(=O)N)C	12	280712	ADA	other
1uml	1o5r	Yes	0.0110316	1.78479	0.424242	OCCCC[n]1c2c(cc1)cccc2	14	280712	ADA	other
1o5r	1uml	Yes	0.012395	1.19771	0.424242	OCCCC[n]1c2c(cc1)cccc2	14	280712	ADA	other
2e1w	1v79	Yes	2.48518	2.87889	0.521739	OC[C@H]([n]1cc([n]c1)C(=O)N)C	12	280712	ADA	other
1v79	2e1w	Yes	0.0108753	2.28649	0.521739	OC[C@H]([n]1cc([n]c1)C(=O)N)C	12	280712	ADA	other
1ndw	1o5r	Yes	1.41346	5.68041	0.461538	OC[C@H]([n]1cc([n]c1)C(=O)N)C	12	280712	ADA	other
1o5r	1ndw	Yes	6.40231	2.28141	0.461538	OC[C@H]([n]1cc([n]c1)C(=O)N)C	12	280712	ADA	other
1uml	1ndw	Yes	1.50703	1.14093	0.461538	OC[C@H]([n]1cc([n]c1)C(=O)N)C	12	280712	ADA	other
1ndw	1uml	Yes	1.54469	7.43797	0.461538	OC[C@H]([n]1cc([n]c1)C(=O)N)C	12	280712	ADA	other
1ndw	1v79	Yes	1.4017	2.49678	0.585366	OC[C@H]([n]1cc([n]c1)C(=O)N)C	12	280712	ADA	other
1v79	1ndw	Yes	1.71848	1.41512	0.585366	OC[C@H]([n]1cc([n]c1)C(=O)N)C	12	280712	ADA	other
1v7a	1v79	Yes	3.14235	2.04365	0.510638	OC[C@H]([n]1cc([n]c1)C(=O)N)C	12	280712	ADA	other
1v79	1v7a	Yes	1.88717	1.3248	0.510638	OC[C@H]([n]1cc([n]c1)C(=O)N)C	12	280712	ADA	other
1uml	1qxl	Yes	0.286144	1.97817	0.411765	OCCCC[n]1c2c(cc1)cccc2	14	280712	ADA	other
1qxl	1uml	Yes	0.952225	1.69622	0.411765	OCCCC[n]1c2c(cc1)cccc2	14	280712	ADA	other
1uml	2e1w	Yes	0.50046	1.50593	0.421053	OC[C@H]([n]1cc([n]c1)C(=O)N)C	12	280712	ADA	other
2e1w	1uml	Yes	0.00988054	2.63475	0.421053	OC[C@H]([n]1cc([n]c1)C(=O)N)C	12	280712	ADA	other
3b92	3g42		0.577389	11.6307	0.553191	C#CCOc1ccc(S(=O)=O)cc1	13	6868	ADAM17	protease
3g42	3b92	Yes	2.70732	11.5731	0.553191	C#CCOc1ccc(S(=O)=O)cc1	13	6868	ADAM17	protease
2oi0	3g42		0.797434	12.182	0.530612	C#CCOc1ccc(S(=O)=O)cc1	13	6868	ADAM17	protease
3g42	2oi0	Yes	2.69388	9.05316	0.530612	C#CCOc1ccc(S(=O)=O)cc1	13	6868	ADAM17	protease
2oi0	1zxc		0.0921162	9.67813	0.565217	C#CCOc1ccc(S(=O)=O)cc1	13	6868	ADAM17	protease
1zxc	2oi0		1.85452	10.5824	0.565217	C#CCOc1ccc(S(=O)=O)cc1	13	6868	ADAM17	protease
2oi0	3b92		1.53994	9.83361	0.684211	C#CCOc1ccc(S(=O)=O)cc1	13	6868	ADAM17	protease
3b92	2oi0		0.0141323	7.00616	0.684211	C#CCOc1ccc(S(=O)=O)cc1	13	6868	ADAM17	protease
2fv5	3e8r		2.99837	8.08335	0.358209	OCc1c2c([n]cc1)cccc2	12	6868	ADAM17	protease
2a8h	3g42		0.402643	9.32422	0.464286	C#CCOc1ccc(S(=O)=O)cc1	13	6868	ADAM17	protease
3g42	2a8h	Yes	2.52885	8.00786	0.464286	C#CCOc1ccc(S(=O)=O)cc1	13	6868	ADAM17	protease
3b92	1zxc		0.512158	10.0215	0.590909	C#CCOc1ccc(S(=O)=O)cc1	13	6868	ADAM17	protease
1zxc	3b92		0.55612	8.71286	0.590909	C#CCOc1ccc(S(=O)=O)cc1	13	6868	ADAM17	protease
2a8h	1zxc		0.648559	7.01326	0.792453	CC1SCCN(S(=O)(=O)c2ccc(O)cc2)[C@H]1C(=O)NO	21	6868	ADAM17	protease
1zxc	2a8h		0.411777	10.0981	0.792453	CC1SCCN(S(=O)(=O)c2ccc(O)cc2)[C@H]1C(=O)NO	21	6868	ADAM17	protease
2oi0	2a8h		1.43355	10.3572	0.553191	C#CCOc1ccc(S(=O)=O)cc1	13	6868	ADAM17	protease
2a8h	2oi0		0.58895	10.5708	0.553191	C#CCOc1ccc(S(=O)=O)cc1	13	6868	ADAM17	protease
3b92	2a8h		0.428957	10.2609	0.577778	C#CCOc1ccc(S(=O)=O)cc1	13	6868	ADAM17	protease
2a8h	3b92		0.566545	7.13117	0.577778	C#CCOc1ccc(S(=O)=O)cc1	13	6868	ADAM17	protease
3le9	3lea	Yes	1.65377	9.04192	0.448276	O=C1[C@H](c2ccccc2)NC(=O)N1	13	6868	ADAM17	protease
3lea	3le9		1.6111	6.00536	0.448276	O=C1[C@H](c2ccccc2)NC(=O)N1	13	6868	ADAM17	protease
3g42	1zxc	Yes	3.11281	11.8443	0.472727	C#CCOc1ccc(S(=O)=O)cc1	13	6868	ADAM17	protease
1zxc	3g42		0.726052	9.77808	0.472727	C#CCOc1ccc(S(=O)=O)cc1	13	6868	ADAM17	protease
2pdc	3lbo	Yes	1.72275	1.0582	0.44898	O=C([O-])COc1ccccc1	11	231	AKR1B1	other
3lbo	2pdc	Yes	9.07867	0.692526	0.44898	O=C([O-])COc1ccccc1	11	231	AKR1B1	other
3m0i	2pdh	Yes	4.6869	0.869827	0.346154	s1c[n]c2c1cccc2	9	231	AKR1B1	other
2pdh	3m0i	Yes	0.673731	0.469456	0.346154	s1c[n]c2c1cccc2	9	231	AKR1B1	other
3lbo	4lb4	Yes	8.79756	0.719675	0.431373	O=C([O-])COc1ccccc1	11	231	AKR1B1	other
4lb4	3lbo		6.31098	0.869371	0.431373	O=C([O-])COc1ccccc1	11	231	AKR1B1	other
2pdc	1us0	Yes	1.79329	2.16058	0.44898	O=C([O-])COc1ccccc1	11	231	AKR1B1	other
1us0	2pdc	Yes	8.96811	0.34744	0.44898	O=C([O-])COc1ccccc1	11	231	AKR1B1	other
2ikg	3dn5	Yes	2.18867	0.830056	0.461538	O=[N+]([O-])c1ccccc1	9	231	AKR1B1	other
3dn5	2ikg	Yes	3.09802	0.543731	0.461538	O=[N+]([O-])c1ccccc1	9	231	AKR1B1	other
2pdc	4lb4	Yes	0.00491121	1.90551	0.5	Clc1ccc(C(=O)NC)c(OC)c1	13	231	AKR1B1	other
4lb4	2pdc		0.00419435	1.2412	0.5	Clc1ccc(C(=O)NC)c(OC)c1	13	231	AKR1B1	other
2pdc	3dn5	Yes	3.26063	1.26896	0.409091	O=[N+]([O-])c1ccccc1	9	231	AKR1B1	other
3dn5	2pdc	Yes	0.614982	0.84046	0.409091	O=[N+]([O-])c1ccccc1	9	231	AKR1B1	other
1us0	4lb4	Yes	8.79702	0.717558	0.431373	O=C([O-])COc1ccccc1	11	231	AKR1B1	other
4lb4	1us0		0.00568624	0.387352	0.431373	O=C([O-])COc1ccccc1	11	231	AKR1B1	other
2pdc	2ikg	Yes	1.49479	1.22334	0.4	O=[N+]([O-])c1ccccc1	9	231	AKR1B1	other
2ikg	2pdc	Yes	2.08845	0.572208	0.4	O=[N+]([O-])c1ccccc1	9	231	AKR1B1	other
4fal	4fam	Yes	0.0111316	0.800118	0.444444	N1CCc2c(C1)cccc2	10	8644	AKR1C3	GPCR
4fam	4fal	Yes	3.34642	0.747784	0.444444	N1CCc2c(C1)cccc2	10	8644	AKR1C3	GPCR
1s2c	3r43	Yes	0.636667	1.56703	0.473684	O=Cc1c(N)cccc1	9	8644	AKR1C3	GPCR
3r43	1s2c	Yes	1.86665	0.377773	0.473684	O=Cc1c(N)cccc1	9	8644	AKR1C3	GPCR
3ufy	4fa3	Yes	3.34355	9.0375	0.512821	c1c2c(ccc1)cccc2	10	8644	AKR1C3	GPCR
4fa3	3ufy	Yes	4.80836	5.87199	0.512821	c1c2c(ccc1)cccc2	10	8644	AKR1C3	GPCR
4fam	4h7c	Yes	1.80607	4.07848	0.409091	O=S(=O)c1ccccc1	9	8644	AKR1C3	GPCR
4h7c	4fam	Yes	3.56758	7.08255	0.409091	O=S(=O)c1ccccc1	9	8644	AKR1C3	GPCR
3r8h	1s2a	Yes	3.81458		0.4	Clc1ccc(C=O)cc1	9	8644	AKR1C3	GPCR
4fal	4h7c	Yes	1.21202	3.6551	0.4	O=S(=O)c1ccccc1	9	8644	AKR1C3	GPCR
4h7c	4fal	Yes	0.808316	0.618723	0.4	O=S(=O)c1ccccc1	9	8644	AKR1C3	GPCR
3ugr	4dbw		5.11161	5.06658	0.938776	Clc1ccc(C(=O)[n]2cc(CC(=O)[O-])c3c2ccc(O)c3)cc1	23	8644	AKR1C3	GPCR
4dbw	3ugr		5.9087	6.74797	0.938776	Clc1ccc(C(=O)[n]2cc(CC(=O)[O-])c3c2ccc(O)c3)cc1	23	8644	AKR1C3	GPCR
4dbw	1s2a		6.23316		0.367347	Clc1ccc(C=O)cc1	9	8644	AKR1C3	GPCR
3r58	4fa3	Yes	3.15421	6.11347	0.512821	c1c2c(ccc1)cccc2	10	8644	AKR1C3	GPCR
4fa3	3r58	Yes	2.98579	7.82183	0.512821	c1c2c(ccc1)cccc2	10	8644	AKR1C3	GPCR
3r8h	4dbw	Yes	1.95431	9.10026	0.409091	Clc1ccc(C=O)cc1	9	8644	AKR1C3	GPCR
4dbw	3r8h		3.98788	6.87645	0.409091	Clc1ccc(C=O)cc1	9	8644	AKR1C3	GPCR
3r8h	3ug8	Yes	4.60495	8.274	0.4	Clc1ccc(C=O)cc1	9	8644	AKR1C3	GPCR
3ug8	3r8h		4.00068	4.95117	0.4	Clc1ccc(C=O)cc1	9	8644	AKR1C3	GPCR
3r8g	3r94	Yes	0.562307	0.362953	0.666667	O=C([O-])[C@@H](c1ccccc1)C	11	8644	AKR1C3	GPCR
3r94	3r8g	Yes	1.5668	1.31281	0.666667	O=C([O-])[C@@H](c1ccccc1)C	11	8644	AKR1C3	GPCR
3ug8	4dbw		3.96299	7.0156	0.938776	Clc1ccc(C(=O)[n]2cc(CC(=O)[O-])c3c2ccc(O)c3)cc1	23	8644	AKR1C3	GPCR
4dbw	3ug8		3.73707	5.3896	0.938776	Clc1ccc(C(=O)[n]2cc(CC(=O)[O-])c3c2ccc(O)c3)cc1	23	8644	AKR1C3	GPCR
3r8h	3ugr	Yes	3.43389	4.11946	0.4	Clc1ccc(C=O)cc1	9	8644	AKR1C3	GPCR
3ugr	3r8h		5.56472	1.68634	0.4	Clc1ccc(C=O)cc1	9	8644	AKR1C3	GPCR
3r6i	3r43	Yes	0.00638254	6.7612	0.918919	O=C([O-])c1c(Nc2cc(C)ccc2)cccc1	17	8644	AKR1C3	GPCR
3r43	3r6i	Yes	0.0171513	0.70167	0.918919	O=C([O-])c1c(Nc2cc(C)ccc2)cccc1	17	8644	AKR1C3	GPCR
3r58	3ufy	Yes	2.31503	5.90073	0.705882	CCc1cc2c(cc1)cccc2	12	8644	AKR1C3	GPCR
3ufy	3r58	Yes	2.18161	6.67536	0.705882	CCc1cc2c(cc1)cccc2	12	8644	AKR1C3	GPCR
1s2c	3r6i	Yes	0.276204	1.3121	0.461538	O=Cc1c(N)cccc1	9	8644	AKR1C3	GPCR
3r6i	1s2c	Yes	2.23389	6.05989	0.461538	O=Cc1c(N)cccc1	9	8644	AKR1C3	GPCR
1gni	4bke		3.75806	1.49323	0.606061	O=C([O-])CCCCCCC	10	213	ALB	other
4bke	1gni		0.298537	2.09914	0.606061	O=C([O-])CCCCCCC	10	213	ALB	other
2bxk	1e7c		0.626524	2.87495	0.967742	O=C([O-])CCCCCCCCCCCC	15	213	ALB	other
1e7c	2bxk		1.33869	1.28413	0.967742	O=C([O-])CCCCCCCCCCCC	15	213	ALB	other
1e7e	1h9z		1.97447	1.75384	0.740741	O=C([O-])CCCCCCC	10	213	ALB	other
1h9z	1e7e		2.12732	1.85586	0.740741	O=C([O-])CCCCCCC	10	213	ALB	other
1hk4	1bj5		0.760112	2.15847	0.689655	O=C([O-])CCCCCCC	10	213	ALB	other
1bj5	1hk4		1.26806	2.52818	0.689655	O=C([O-])CCCCCCC	10	213	ALB	other
2bxp	4bke		1.2149	1.83533	0.689655	O=C([O-])CCCCCCC	10	213	ALB	other
4bke	2bxp		0.721321	1.61309	0.689655	O=C([O-])CCCCCCC	10	213	ALB	other
1bj5	1e7f		1.49858	2.67956	0.962963	O=C([O-])CCCCCCCCCC	13	213	ALB	other
1e7f	1bj5		1.31826	2.35193	0.962963	O=C([O-])CCCCCCCCCC	13	213	ALB	other
1gni	2xvv		3.18073	1.89083	0.555556	O=C([O-])CCCCCCC	10	213	ALB	other
2xvv	1gni		1.42967	1.70201	0.555556	O=C([O-])CCCCCCC	10	213	ALB	other
2bxp	1e7e		2.41628	1.97075	0.740741	O=C([O-])CCCCCCC	10	213	ALB	other
1e7e	2bxp		1.87347	1.62217	0.740741	O=C([O-])CCCCCCC	10	213	ALB	other
1e7g	2bxk		1.61826	1.99475	0.666667	O=C([O-])CCCCCCC	10	213	ALB	other
2bxk	1e7g		1.14453	1.36402	0.666667	O=C([O-])CCCCCCC	10	213	ALB	other
2bxk	1e7f		1.58146	2.45822	0.896552	O=C([O-])CCCCCCCCCC	13	213	ALB	other
1e7f	2bxk		1.04988	2.86047	0.896552	O=C([O-])CCCCCCCCCC	13	213	ALB	other
4bke	2bxm		1.7874	2.35276	0.689655	O=C([O-])CCCCCCC	10	213	ALB	other
2bxm	4bke		1.66622	1.76833	0.689655	O=C([O-])CCCCCCC	10	213	ALB	other
1gni	1e7c		2.27489	2.1161	0.571429	O=C([O-])CCCCCCC	10	213	ALB	other
1e7c	1gni		1.12682	2.47255	0.571429	O=C([O-])CCCCCCC	10	213	ALB	other
1e7f	1e7h		0.854697	3.10011	0.769231	O=C([O-])CCCCCCC	10	213	ALB	other
1e7h	1e7f		1.14379	1.79722	0.769231	O=C([O-])CCCCCCC	10	213	ALB	other
1ha2	1e7c		1.1316	2.53967	0.645161	O=C([O-])CCCCCCC	10	213	ALB	other
1e7c	1ha2		1.94274	2.25326	0.645161	O=C([O-])CCCCCCC	10	213	ALB	other
2bxm	3sqj		0.805044	3.35541	0.933333	O=C([O-])CCCCCCCCCCC	14	213	ALB	other
3sqj	2bxm		1.13588	2.21768	0.933333	O=C([O-])CCCCCCCCCCC	14	213	ALB	other
2bxp	1e7c		1.07681	2.80219	0.645161	O=C([O-])CCCCCCC	10	213	ALB	other
1e7c	2bxp		2.06426	2.79575	0.645161	O=C([O-])CCCCCCC	10	213	ALB	other
2xvv	1e7f		1.41057	2.24798	0.896552	O=C([O-])CCCCCCCCCC	13	213	ALB	other
1e7f	2xvv		1.8414	2.23539	0.896552	O=C([O-])CCCCCCCCCC	13	213	ALB	other
1e7c	1e7f		1.58736	2.00366	0.928571	O=C([O-])CCCCCCCCCC	13	213	ALB	other
1e7f	1e7c		1.52891	2.6141	0.928571	O=C([O-])CCCCCCCCCC	13	213	ALB	other
1hk4	1h9z		1.14176	2.92633	0.645161	O=C([O-])CCCCCCC	10	213	ALB	other
1h9z	1hk4		1.19254	1.5326	0.645161	O=C([O-])CCCCCCC	10	213	ALB	other
1e7e	2bxk		2.82399	1.208	0.740741	O=C([O-])CCCCCCC	10	213	ALB	other
2bxk	1e7e		2.35955	2.22681	0.740741	O=C([O-])CCCCCCC	10	213	ALB	other
1hk4	2bxk		0.658514	1.07472	0.645161	O=C([O-])CCCCCCC	10	213	ALB	other
2bxk	1hk4		0.957231	1.77274	0.645161	O=C([O-])CCCCCCC	10	213	ALB	other
1hk4	1e7e		2.47241	2.77389	0.769231	O=C([O-])CCCCCCC	10	213	ALB	other
1e7e	1hk4		2.40377	1.63428	0.769231	O=C([O-])CCCCCCC	10	213	ALB	other
1e7g	1e7e		2.06292	2.3906	0.8	O=C([O-])CCCCCCC	10	213	ALB	other
1e7e	1e7g		1.36706	1.19198	0.8	O=C([O-])CCCCCCC	10	213	ALB	other
2bxp	1e7h		1.46203	2.50063	0.689655	O=C([O-])CCCCCCC	10	213	ALB	other
1e7h	2bxp		1.16449	1.84774	0.689655	O=C([O-])CCCCCCC	10	213	ALB	other
4bke	3uiv		1.22392	2.23367	0.740741	O=C([O-])CCCCCCC	10	213	ALB	other
3uiv	4bke		1.21272	2.40407	0.740741	O=C([O-])CCCCCCC	10	213	ALB	other
1hk4	2bxm		1.20763	2.63073	0.645161	O=C([O-])CCCCCCC	10	213	ALB	other
2bxm	1hk4		1.08181	1.51031	0.645161	O=C([O-])CCCCCCC	10	213	ALB	other
1e7f	1ha2		1.67649	2.00111	0.689655	O=C([O-])CCCCCCC	10	213	ALB	other
1ha2	1e7f		1.98506	2.8985	0.689655	O=C([O-])CCCCCCC	10	213	ALB	other
2bxm	1e7g		1.17876	1.56786	0.933333	O=C([O-])CCCCCCCCCCC	14	213	ALB	other
1e7g	2bxm		0.659322	2.41482	0.933333	O=C([O-])CCCCCCCCCCC	14	213	ALB	other
3sqj	1e7f		1.05674	1.80054	0.740741	O=C([O-])CCCCCCC	10	213	ALB	other
1e7f	3sqj		1.01067	2.47339	0.740741	O=C([O-])CCCCCCC	10	213	ALB	other
1h9z	1e7h		0.408053	1.59681	0.896552	O=C([O-])CCCCCCCCCC	13	213	ALB	other
1e7h	1h9z		0.824875	1.47639	0.896552	O=C([O-])CCCCCCCCCC	13	213	ALB	other
3sqj	2bxp		1.27005	2.02191	0.666667	O=C([O-])CCCCCCC	10	213	ALB	other
2bxp	3sqj		1.0232	3.46735	0.666667	O=C([O-])CCCCCCC	10	213	ALB	other
1e7c	4bke		1.82526	1.4747	0.928571	O=C([O-])CCCCCCCCCC	13	213	ALB	other
4bke	1e7c		1.33003	1.99173	0.928571	O=C([O-])CCCCCCCCCC	13	213	ALB	other
2bxp	3uiv		0.847092	2.51228	0.666667	O=C([O-])CCCCCCC	10	213	ALB	other
3uiv	2bxp		1.75248	1.82447	0.666667	O=C([O-])CCCCCCC	10	213	ALB	other
3sqj	1gni		1.12282	2.38884	0.588235	O=C([O-])CCCCCCC	10	213	ALB	other
1gni	3sqj		0.860002	1.29788	0.588235	O=C([O-])CCCCCCC	10	213	ALB	other
1h9z	3uiv		1.05797	2.40641	0.933333	O=C([O-])CCCCCCCCCCC	14	213	ALB	other
3uiv	1h9z		2.0427	2.38809	0.933333	O=C([O-])CCCCCCCCCCC	14	213	ALB	other
1ha2	1e7e		2.42423	1.97314	0.740741	O=C([O-])CCCCCCC	10	213	ALB	other
1e7e	1ha2		2.64453	1.5147	0.740741	O=C([O-])CCCCCCC	10	213	ALB	other
1e7c	1e7e		2.35535	2.60201	0.769231	O=C([O-])CCCCCCC	10	213	ALB	other
1e7e	1e7c		2.79283	1.32033	0.769231	O=C([O-])CCCCCCC	10	213	ALB	other
1e7h	2xvv		1.59534	1.58007	0.689655	O=C([O-])CCCCCCC	10	213	ALB	other
2xvv	1e7h		1.7057	2.85104	0.689655	O=C([O-])CCCCCCC	10	213	ALB	other
3sqj	1e7h		1.14701	3.21294	0.740741	O=C([O-])CCCCCCC	10	213	ALB	other
1e7h	3sqj		1.14892	2.26686	0.740741	O=C([O-])CCCCCCC	10	213	ALB	other
1e7f	4bke		1.12024	1.74162	0.769231	O=C([O-])CCCCCCC	10	213	ALB	other
4bke	1e7f		1.18453	1.74894	0.769231	O=C([O-])CCCCCCC	10	213	ALB	other
1e7c	2bxm		1.58442	2.34045	0.645161	O=C([O-])CCCCCCC	10	213	ALB	other
2bxm	1e7c		1.04057	2.82078	0.645161	O=C([O-])CCCCCCC	10	213	ALB	other
2bxp	1bj5		1.01196	2.18701	0.666667	O=C([O-])CCCCCCC	10	213	ALB	other
1bj5	2bxp		1.61579	2.98745	0.666667	O=C([O-])CCCCCCC	10	213	ALB	other
1ha2	4bke		1.70548	1.77155	0.689655	O=C([O-])CCCCCCC	10	213	ALB	other
4bke	1ha2		1.17017	2.3729	0.689655	O=C([O-])CCCCCCC	10	213	ALB	other
1e7c	1h9z		1.11644	2.66465	0.645161	O=C([O-])CCCCCCC	10	213	ALB	other
1h9z	1e7c		1.1201	2.18506	0.645161	O=C([O-])CCCCCCC	10	213	ALB	other
2bxp	1hk4		1.19352	1.72376	0.967742	O=C([O-])CCCCCCCCCCCC	15	213	ALB	other
1hk4	2bxp		1.64215	2.90367	0.967742	O=C([O-])CCCCCCCCCCCC	15	213	ALB	other
4bke	1e7e		2.11127	2.3673	0.833333	O=C([O-])CCCCCCC	10	213	ALB	other
1e7e	4bke		2.46512	2.67082	0.833333	O=C([O-])CCCCCCC	10	213	ALB	other
4bke	1bj5		0.927508	2.04908	0.740741	O=C([O-])CCCCCCC	10	213	ALB	other
1bj5	4bke		1.06364	2.12302	0.740741	O=C([O-])CCCCCCC	10	213	ALB	other
1e7g	4bke		0.738096	1.7079	0.740741	O=C([O-])CCCCCCC	10	213	ALB	other
4bke	1e7g		0.887371	1.46751	0.740741	O=C([O-])CCCCCCC	10	213	ALB	other
1gni	1ha2		2.76198	1.67954	0.555556	O=C([O-])CCCCCCC	10	213	ALB	other
1ha2	1gni		1.36714	2.012	0.555556	O=C([O-])CCCCCCC	10	213	ALB	other
2bxm	1e7e		2.44015	2.20553	0.740741	O=C([O-])CCCCCCC	10	213	ALB	other
1e7e	2bxm		2.40384	1.30533	0.740741	O=C([O-])CCCCCCC	10	213	ALB	other
3uiv	1e7e		2.03502	2.39384	0.8	O=C([O-])CCCCCCC	10	213	ALB	other
1e7e	3uiv		0.825122	1.50165	0.8	O=C([O-])CCCCCCC	10	213	ALB	other
2bxk	4bke		1.23579	1.49681	0.896552	O=C([O-])CCCCCCCCCC	13	213	ALB	other
4bke	2bxk		1.66463	1.4538	0.896552	O=C([O-])CCCCCCCCCC	13	213	ALB	other
2bxp	1e7g		1.32999	1.63356	0.666667	O=C([O-])CCCCCCC	10	213	ALB	other
1e7g	2bxp		1.51306	2.74419	0.666667	O=C([O-])CCCCCCC	10	213	ALB	other
1hk4	3uiv		0.852098	2.18763	0.689655	O=C([O-])CCCCCCC	10	213	ALB	other
3uiv	1hk4		1.74303	2.18281	0.689655	O=C([O-])CCCCCCC	10	213	ALB	other
3uiv	2bxk		1.35519	1.76665	0.666667	O=C([O-])CCCCCCC	10	213	ALB	other
2bxk	3uiv		1.43072	2.89054	0.666667	O=C([O-])CCCCCCC	10	213	ALB	other
2bxm	1e7f		1.37312	1.9157	0.896552	O=C([O-])CCCCCCCCCC	13	213	ALB	other
1e7f	2bxm		1.2222	1.9107	0.896552	O=C([O-])CCCCCCCCCC	13	213	ALB	other
1h9z	1e7f		1.30855	1.96469	0.896552	O=C([O-])CCCCCCCCCC	13	213	ALB	other
1e7f	1h9z		1.07961	1.6791	0.896552	O=C([O-])CCCCCCCCCC	13	213	ALB	other
1h9z	3sqj		0.735055	3.26307	0.933333	O=C([O-])CCCCCCCCCCC	14	213	ALB	other
3sqj	1h9z		1.62111	2.06826	0.933333	O=C([O-])CCCCCCCCCCC	14	213	ALB	other
1ha2	1bj5		1.10337	2.17861	0.666667	O=C([O-])CCCCCCC	10	213	ALB	other
1bj5	1ha2		1.44788	2.32436	0.666667	O=C([O-])CCCCCCC	10	213	ALB	other
1e7f	1e7g		0.790325	1.68623	0.740741	O=C([O-])CCCCCCC	10	213	ALB	other
1e7g	1e7f		1.38085	2.02063	0.740741	O=C([O-])CCCCCCC	10	213	ALB	other
1e7g	1h9z		0.0233039	1.75363	0.666667	O=C([O-])CCCCCCC	10	213	ALB	other
1h9z	1e7g		0.969905	1.67442	0.666667	O=C([O-])CCCCCCC	10	213	ALB	other
3sqj	1e7e		1.9834	2.33648	0.8	O=C([O-])CCCCCCC	10	213	ALB	other
1e7e	3sqj		1.31884	1.4939	0.8	O=C([O-])CCCCCCC	10	213	ALB	other
1hk4	1e7f		1.59486	1.95635	0.714286	O=C([O-])CCCCCCC	10	213	ALB	other
1e7f	1hk4		0.915867	2.4945	0.714286	O=C([O-])CCCCCCC	10	213	ALB	other
1ha2	1e7g		1.55922	1.98012	0.933333	O=C([O-])CCCCCCCCCCC	14	213	ALB	other
1e7g	1ha2		1.65667	2.26081	0.933333	O=C([O-])CCCCCCCCCCC	14	213	ALB	other
2bxp	1e7f		0.94235	1.93484	0.689655	O=C([O-])CCCCCCC	10	213	ALB	other
1e7f	2bxp		0.846618	1.75084	0.689655	O=C([O-])CCCCCCC	10	213	ALB	other
1hk4	2xvv		0.954366	1.6411	0.645161	O=C([O-])CCCCCCC	10	213	ALB	other
2xvv	1hk4		1.00486	1.39702	0.645161	O=C([O-])CCCCCCC	10	213	ALB	other
3uiv	2bxm		1.18753	1.82516	0.666667	O=C([O-])CCCCCCC	10	213	ALB	other
1hk4	3sqj		1.41922	1.22809	0.965517	O=C([O-])CCCCCCCCCCC	14	213	ALB	other
3sqj	1hk4		1.37763	2.48932	0.965517	O=C([O-])CCCCCCCCCCC	14	213	ALB	other
1gni	1h9z		2.70133	1.4717	0.555556	O=C([O-])CCCCCCC	10	213	ALB	other
1h9z	1gni		0.853286	2.39647	0.555556	O=C([O-])CCCCCCC	10	213	ALB	other
2bxm	1bj5		1.03068	2.15517	0.666667	O=C([O-])CCCCCCC	10	213	ALB	other
1bj5	2bxm		0.990022	2.67451	0.666667	O=C([O-])CCCCCCC	10	213	ALB	other
1gni	1hk4		1.21431	1.85062	0.571429	O=C([O-])CCCCCCC	10	213	ALB	other
1hk4	1gni		1.29975	2.61738	0.571429	O=C([O-])CCCCCCC	10	213	ALB	other
4bke	1h9z		0.0477502	1.70687	0.689655	O=C([O-])CCCCCCC	10	213	ALB	other
1h9z	4bke		0.978627	1.82655	0.689655	O=C([O-])CCCCCCC	10	213	ALB	other
1gni	1e7e		1.90247	1.3145	0.645161	O=C([O-])CCCCCCC	10	213	ALB	other
1e7e	1gni		1.56507	1.24094	0.645161	O=C([O-])CCCCCCC	10	213	ALB	other
4bke	2xvv		0.419719	0.765435	0.689655	O=C([O-])CCCCCCC	10	213	ALB	other
2xvv	4bke		0.997077	1.84363	0.689655	O=C([O-])CCCCCCC	10	213	ALB	other
1ha2	1e7h		1.82552	2.77173	0.689655	O=C([O-])CCCCCCC	10	213	ALB	other
1e7h	1ha2		1.24267	2.36043	0.689655	O=C([O-])CCCCCCC	10	213	ALB	other
1e7h	2bxk		2.18944	1.29707	0.689655	O=C([O-])CCCCCCC	10	213	ALB	other
2bxk	1e7h		1.15523	2.19375	0.689655	O=C([O-])CCCCCCC	10	213	ALB	other
3sqj	1ha2		0.575508	1.94094	0.666667	O=C([O-])CCCCCCC	10	213	ALB	other
1ha2	3sqj		1.01161	3.38258	0.666667	O=C([O-])CCCCCCC	10	213	ALB	other
2xvv	1e7e		2.17333	1.98592	0.740741	O=C([O-])CCCCCCC	10	213	ALB	other
1e7e	2xvv		2.72284	2.80043	0.740741	O=C([O-])CCCCCCC	10	213	ALB	other
1e7e	1bj5		2.21392	1.59405	0.8	O=C([O-])CCCCCCC	10	213	ALB	other
1bj5	1e7e		2.47006	2.79739	0.8	O=C([O-])CCCCCCC	10	213	ALB	other
1ha2	3uiv		0.754337	2.31328	0.666667	O=C([O-])CCCCCCC	10	213	ALB	other
3uiv	1ha2		1.00795	2.55439	0.666667	O=C([O-])CCCCCCC	10	213	ALB	other
3sqj	4bke		1.25524	2.08096	0.740741	O=C([O-])CCCCCCC	10	213	ALB	other
4bke	3sqj		0.808328	2.17017	0.740741	O=C([O-])CCCCCCC	10	213	ALB	other
1gni	2bxk		2.41383	1.75351	0.555556	O=C([O-])CCCCCCC	10	213	ALB	other
2bxk	1gni		1.32904	2.08384	0.555556	O=C([O-])CCCCCCC	10	213	ALB	other
1gni	3uiv		1.738	1.88399	0.588235	O=C([O-])CCCCCCC	10	213	ALB	other
3uiv	1gni		1.30139	1.73313	0.588235	O=C([O-])CCCCCCC	10	213	ALB	other
1gni	1e7f		1.53543	2.5348	0.606061	O=C([O-])CCCCCCC	10	213	ALB	other
1e7f	1gni		1.15859	2.40819	0.606061	O=C([O-])CCCCCCC	10	213	ALB	other
1e7f	3uiv		1.24267	1.44677	0.740741	O=C([O-])CCCCCCC	10	213	ALB	other
3uiv	1e7f		1.86762	2.3107	0.740741	O=C([O-])CCCCCCC	10	213	ALB	other
1gni	1bj5		1.67401	2.30385	0.588235	O=C([O-])CCCCCCC	10	213	ALB	other
1bj5	1gni		1.19715	2.23201	0.588235	O=C([O-])CCCCCCC	10	213	ALB	other
1e7g	1e7h		0.47519	2.47442	0.740741	O=C([O-])CCCCCCC	10	213	ALB	other
1e7h	1e7g		0.992164	1.34613	0.740741	O=C([O-])CCCCCCC	10	213	ALB	other
3sqj	2bxk		1.91803	2.30541	0.666667	O=C([O-])CCCCCCC	10	213	ALB	other
2bxk	3sqj		0.948868	3.59259	0.666667	O=C([O-])CCCCCCC	10	213	ALB	other
1e7h	1e7e		1.11427	1.64835	0.833333	O=C([O-])CCCCCCC	10	213	ALB	other
1e7e	1e7h		2.29777	1.25107	0.833333	O=C([O-])CCCCCCC	10	213	ALB	other
2bxm	1e7h		1.59932	2.7842	0.689655	O=C([O-])CCCCCCC	10	213	ALB	other
1e7h	2bxm		1.04941	2.32724	0.689655	O=C([O-])CCCCCCC	10	213	ALB	other
1h9z	1bj5		1.09192	1.79856	0.933333	O=C([O-])CCCCCCCCCCC	14	213	ALB	other
1bj5	1h9z		1.62729	1.92441	0.933333	O=C([O-])CCCCCCCCCCC	14	213	ALB	other
1hk4	4bke		1.51637	1.75003	0.714286	O=C([O-])CCCCCCC	10	213	ALB	other
4bke	1hk4		1.0778	2.50492	0.714286	O=C([O-])CCCCCCC	10	213	ALB	other
1gni	2bxm		3.10334	1.62203	0.555556	O=C([O-])CCCCCCC	10	213	ALB	other
2bxm	1gni		1.56712	1.86965	0.555556	O=C([O-])CCCCCCC	10	213	ALB	other
3uiv	1e7h		1.36435	2.36531	0.740741	O=C([O-])CCCCCCC	10	213	ALB	other
1e7h	3uiv		0.994843	2.06684	0.740741	O=C([O-])CCCCCCC	10	213	ALB	other
1e7f	1e7e		1.2342	2.40197	0.833333	O=C([O-])CCCCCCC	10	213	ALB	other
1e7e	1e7f		1.51166	1.78834	0.833333	O=C([O-])CCCCCCC	10	213	ALB	other
1e7c	1e7h		0.902818	1.97703	0.714286	O=C([O-])CCCCCCC	10	213	ALB	other
1e7h	1e7c		1.47691	1.77109	0.714286	O=C([O-])CCCCCCC	10	213	ALB	other
1hk4	1e7g		1.33536	2.60645	0.689655	O=C([O-])CCCCCCC	10	213	ALB	other
1e7g	1hk4		1.41676	2.02397	0.689655	O=C([O-])CCCCCCC	10	213	ALB	other
1gni	1e7h		1.87674	2.74031	0.606061	O=C([O-])CCCCCCC	10	213	ALB	other
1e7h	1gni		0.785903	1.94393	0.606061	O=C([O-])CCCCCCC	10	213	ALB	other
1hk4	1e7h		1.03274	1.38963	0.714286	O=C([O-])CCCCCCC	10	213	ALB	other
1e7h	1hk4		1.20633	2.27861	0.714286	O=C([O-])CCCCCCC	10	213	ALB	other
1bj5	1e7h		1.13671	2.91714	0.962963	O=C([O-])CCCCCCCCCC	13	213	ALB	other
1e7h	1bj5		2.12411	1.41081	0.962963	O=C([O-])CCCCCCCCCC	13	213	ALB	other
1ha2	1hk4		1.62288	1.51581	0.967742	O=C([O-])CCCCCCCCCCCC	15	213	ALB	other
1hk4	1ha2		1.58424	2.25913	0.967742	O=C([O-])CCCCCCCCCCCC	15	213	ALB	other
2bxk	1bj5		0.59988	2.08311	0.666667	O=C([O-])CCCCCCC	10	213	ALB	other
1bj5	2bxk		0.815153	1.51354	0.666667	O=C([O-])CCCCCCC	10	213	ALB	other
1gni	2bxp		3.06073	1.98361	0.555556	O=C([O-])CCCCCCC	10	213	ALB	other
2bxp	1gni		1.42449	1.91451	0.555556	O=C([O-])CCCCCCC	10	213	ALB	other
1gni	1e7g		1.71603	2.63626	0.588235	O=C([O-])CCCCCCC	10	213	ALB	other
1e7g	1gni		0.460949	1.77079	0.588235	O=C([O-])CCCCCCC	10	213	ALB	other
3h0v	3ep8	Yes	0.910944		0.653061	O[C@H]1[C@@H](OCC1)[n]1c[n]c2c(N)[n]c[n]c12	16	262	AMD1	other
3ep8	3h0v		1.44106	2.52779	0.653061	O[C@H]1[C@@H](OCC1)[n]1c[n]c2c(N)[n]c[n]c12	16	262	AMD1	other
3dz6	3dz7	Yes	2.14802	5.72073	0.377358	C[NH2+]C[C@H]1OC[C@@H]([C@@H]1O)O	10	262	AMD1	other
3h0v	3ep6	Yes	0.992166		0.653061	O[C@H]1[C@@H](OCC1)[n]1c[n]c2c(N)[n]c[n]c12	16	262	AMD1	other
3ep6	3h0v		1.43005	2.52227	0.653061	O[C@H]1[C@@H](OCC1)[n]1c[n]c2c(N)[n]c[n]c12	16	262	AMD1	other
1i72	3ep8	Yes	0.807109	5.91927	0.615385	O[C@H]1[C@@H](OCC1)[n]1c[n]c2c(N)[n]c[n]c12	16	262	AMD1	other
1i79	3ep6	Yes	1.54428	7.9839	0.603774	O[C@H]1[C@@H](OCC1)[n]1c[n]c2c(N)[n]c[n]c12	16	262	AMD1	other
1i72	3ep7	Yes	0.614358	6.94021	0.615385	O[C@H]1[C@@H](OCC1)[n]1c[n]c2c(N)[n]c[n]c12	16	262	AMD1	other
1i72	3ep6	Yes	0.4955	6.87789	0.615385	O[C@H]1[C@@H](OCC1)[n]1c[n]c2c(N)[n]c[n]c12	16	262	AMD1	other
3dz6	1i72	Yes	1.80682	6.68585	0.384615	C[NH2+]C[C@H]1OC[C@@H]([C@@H]1O)O	10	262	AMD1	other
3dz7	1i72	Yes	1.37836	6.4266	0.408163	C[NH2+]C[C@H]1OC[C@@H]([C@@H]1O)O	10	262	AMD1	other
3h0v	3ep7	Yes	0.786516		0.653061	O[C@H]1[C@@H](OCC1)[n]1c[n]c2c(N)[n]c[n]c12	16	262	AMD1	other
3ep7	3h0v		1.85636	3.09478	0.653061	O[C@H]1[C@@H](OCC1)[n]1c[n]c2c(N)[n]c[n]c12	16	262	AMD1	other
1i79	1i7b	Yes	1.38307	7.0669	0.603774	O[C@H]1[C@@H](OCC1)[n]1c[n]c2c(N)[n]c[n]c12	16	262	AMD1	other
3dz4	3h0w		1.23576	6.85967	0.916667	Nc1[n]c[n]c2[n](c([n]c12)C)[C@@H]1O[C@H](C[NH+](C)C)[C@H]([C@H]1O)O	22	262	AMD1	other
1i72	3h0v	Yes	1.90074	7.06473	0.711111	O[C@H]1[C@@H](OCC1)[n]1c[n]c2c(N)[n]c[n]c12	16	262	AMD1	other
3h0v	1i7b	Yes	0.929505		0.653061	O[C@H]1[C@@H](OCC1)[n]1c[n]c2c(N)[n]c[n]c12	16	262	AMD1	other
1i7b	3h0v		1.31181	2.4118	0.653061	O[C@H]1[C@@H](OCC1)[n]1c[n]c2c(N)[n]c[n]c12	16	262	AMD1	other
1i72	1i7b	Yes	0.554329	6.84616	0.615385	O[C@H]1[C@@H](OCC1)[n]1c[n]c2c(N)[n]c[n]c12	16	262	AMD1	other
1i79	3h0v	Yes	1.46743	7.08797	0.695652	O[C@H]1[C@@H](OCC1)[n]1c[n]c2c(N)[n]c[n]c12	16	262	AMD1	other
1i72	1i79	Yes	1.79255	7.1152	0.408163	C[NH2+]C[C@H]1OC[C@@H]([C@@H]1O)O	10	262	AMD1	other
1i79	3ep7	Yes	1.29966	7.84203	0.603774	O[C@H]1[C@@H](OCC1)[n]1c[n]c2c(N)[n]c[n]c12	16	262	AMD1	other
1i79	3ep8	Yes	1.51796	7.8342	0.603774	O[C@H]1[C@@H](OCC1)[n]1c[n]c2c(N)[n]c[n]c12	16	262	AMD1	other
2ax6	3b68		0.865641	0.296188	0.509804	O=[N+]([O-])c1c(C(F)(F)F)cccc1	13	367	AR	NHR
2ax6	3rll		0.00930591	0.456052	0.384615	FC(c1ccccc1)(F)F	10	367	AR	NHR
3b67	2ax9		1.8582		0.490566	O=[N+]([O-])c1c(C(F)(F)F)cccc1	13	367	AR	NHR
2ax9	3b67		0.0061062	0.360163	0.490566	O=[N+]([O-])c1c(C(F)(F)F)cccc1	13	367	AR	NHR
2ax8	3v49		0.552334	0.886628	0.357143	FC(c1ccccc1)(F)F	10	367	AR	NHR
3v49	2ax8	Yes	0.850237	0.748501	0.357143	FC(c1ccccc1)(F)F	10	367	AR	NHR
3b5r	3v49	Yes	1.4718	0.938964	0.357143	FC(c1ccccc1)(F)F	10	367	AR	NHR
3v49	3b5r	Yes	0.390566	0.595051	0.357143	FC(c1ccccc1)(F)F	10	367	AR	NHR
3b5r	2ax9	Yes	3.04046		0.408163	FC(c1ccccc1)(F)F	10	367	AR	NHR
2ax9	3b5r		0.0121968	0.379567	0.408163	FC(c1ccccc1)(F)F	10	367	AR	NHR
3b68	3rlj		1.17682	2.24743	0.338983	FC(c1ccccc1)(F)F	10	367	AR	NHR
3rlj	3b68	Yes	0.61321	0.875083	0.338983	FC(c1ccccc1)(F)F	10	367	AR	NHR
3b65	2ax7		0.00296648	0.294051	0.490566	O[C@@](COc1ccccc1)(C=O)C	13	367	AR	NHR
2ax7	3b65		0.269976	0.684622	0.490566	O[C@@](COc1ccccc1)(C=O)C	13	367	AR	NHR
2ax6	3b5r		0.0101242	0.558698	0.416667	FC(c1ccccc1)(F)F	10	367	AR	NHR
1z95	3v49	Yes	1.35787	1.53714	0.350877	FC(c1ccccc1)(F)F	10	367	AR	NHR
3v49	1z95	Yes	0.754618	1.01006	0.350877	FC(c1ccccc1)(F)F	10	367	AR	NHR
1t5z	2pnu	Yes	0.0127765	0.339885	0.754717	O[C@@H]1[C@@H]2[C@H]([C@H]3[C@@H]([C@@]4(C)CCC(=O)C[C@@H]4CC3)CC2)CC1	20	367	AR	NHR
3b5r	3rll	Yes	1.24457	1.34903	0.633333	O=C(Nc1ccc(C#N)c(C(F)F)c1)[C@@](CO)(C)O	19	367	AR	NHR
3rll	3b5r		1.98489	7.54347	0.633333	O=C(Nc1ccc(C#N)c(C(F)F)c1)[C@@](CO)(C)O	19	367	AR	NHR
2axa	3rlj		0.0354864	0.495256	0.357143	FC(c1ccccc1)(F)F	10	367	AR	NHR
3rlj	2axa	Yes	0.114607	0.458567	0.357143	FC(c1ccccc1)(F)F	10	367	AR	NHR
3b65	3b68		0.00998599	0.352817	0.464286	O[C@@](COc1ccccc1)(C=O)C	13	367	AR	NHR
3b68	3b65		0.189329	0.988661	0.464286	O[C@@](COc1ccccc1)(C=O)C	13	367	AR	NHR
3rlj	3b66	Yes	0.0680011	0.313231	0.350877	FC(c1ccccc1)(F)F	10	367	AR	NHR
2axa	4ojb		0.029288	0.774961	0.350877	FC(c1ccccc1)(F)F	10	367	AR	NHR
4ojb	2axa	Yes	0.849405	0.892196	0.350877	FC(c1ccccc1)(F)F	10	367	AR	NHR
2axa	3b67		0.00478838	0.441839	0.433333	O=[N+]([O-])c1c(C(F)(F)F)cccc1	13	367	AR	NHR
3b67	2axa		0.00439815	0.712882	0.433333	O=[N+]([O-])c1c(C(F)(F)F)cccc1	13	367	AR	NHR
3rlj	4ojb	Yes	0.211578	0.412238	0.350877	FC(c1ccccc1)(F)F	10	367	AR	NHR
2amb	1e3g	Yes	0.496101	0.523704	0.954545	O[C@@]1([C@@]2([C@H]([C@H]3C(=C4C(=CC(=O)CC4)CC3)C=C2)CC1)C)C	21	367	AR	NHR
1e3g	2amb	Yes	0.00894427	0.242068	0.954545	O[C@@]1([C@@]2([C@H]([C@H]3C(=C4C(=CC(=O)CC4)CC3)C=C2)CC1)C)C	21	367	AR	NHR
2ax8	3rlj		0.035826	0.496509	0.357143	FC(c1ccccc1)(F)F	10	367	AR	NHR
3rlj	2ax8	Yes	0.285486	0.641058	0.357143	FC(c1ccccc1)(F)F	10	367	AR	NHR
3v49	4ojb	Yes	0.818476	0.871357	0.350877	FC(c1ccccc1)(F)F	10	367	AR	NHR
4ojb	3v49	Yes	1.34997	1.58298	0.350877	FC(c1ccccc1)(F)F	10	367	AR	NHR
2ax6	2ax9		0.00363318	0.393592	0.634146	O=[N+]([O-])c1c(C(F)(F)F)cccc1	13	367	AR	NHR
2ax9	2ax6		0.725288	0.995386	0.634146	O=[N+]([O-])c1c(C(F)(F)F)cccc1	13	367	AR	NHR
3b67	3v49		2.57381	2.47557	0.333333	FC(c1ccccc1)(F)F	10	367	AR	NHR
3v49	3b67	Yes	1.70367	1.18247	0.333333	FC(c1ccccc1)(F)F	10	367	AR	NHR
3l3z	2pnu	Yes	0.0143078	0.340028	0.754717	O[C@@H]1[C@@H]2[C@H]([C@H]3[C@@H]([C@@]4(C)CCC(=O)C[C@@H]4CC3)CC2)CC1	20	367	AR	NHR
3b67	4ojb		0.217326	0.644977	0.327869	FC(c1ccccc1)(F)F	10	367	AR	NHR
4ojb	3b67	Yes	0.968756	1.06206	0.327869	FC(c1ccccc1)(F)F	10	367	AR	NHR
2ax8	3b68		3.5473	0.742931	0.542373	O[C@](C(=O)Nc1ccc([N+](=O)[O-])cc1)(C)C	16	367	AR	NHR
1z95	2ax8	Yes	0.917211	0.665547	0.350877	FC(c1ccccc1)(F)F	10	367	AR	NHR
2ax8	1z95		0.00428869	0.809764	0.350877	FC(c1ccccc1)(F)F	10	367	AR	NHR
3rlj	2ax9	Yes	2.03564		0.408163	FC(c1ccccc1)(F)F	10	367	AR	NHR
2ax9	3rlj		0.251574	0.304344	0.408163	FC(c1ccccc1)(F)F	10	367	AR	NHR
1z95	2ax7	Yes	0.808002	0.806966	0.350877	FC(c1ccccc1)(F)F	10	367	AR	NHR
2ax7	1z95		0.0167918	0.816888	0.350877	FC(c1ccccc1)(F)F	10	367	AR	NHR
2ao6	2amb	Yes	0.0116721	0.246253	0.909091	O[C@@H]1[C@@]2(C)C=CC3=C4C(=CC(=O)CC4)CC[C@H]3[C@@H]2CC1	20	367	AR	NHR
2amb	2ao6	Yes	0.332206	0.382593	0.909091	O[C@@H]1[C@@]2(C)C=CC3=C4C(=CC(=O)CC4)CC[C@H]3[C@@H]2CC1	20	367	AR	NHR
2pix	2pnu	Yes	0.0197737	0.341796	0.792453	O[C@@H]1[C@@]2([C@H]([C@H]3[C@@H]([C@]4(CCC(=O)C[C@@H]4CC3)C)CC2)CC1)C	21	367	AR	NHR
2ax7	3b67		0.00581562	0.441922	0.433333	O=[N+]([O-])c1c(C(F)(F)F)cccc1	13	367	AR	NHR
3b67	2ax7		0.464096	0.506639	0.433333	O=[N+]([O-])c1c(C(F)(F)F)cccc1	13	367	AR	NHR
1z95	3rlj	Yes	0.891932	0.925507	0.350877	FC(c1ccccc1)(F)F	10	367	AR	NHR
3rlj	1z95	Yes	0.608337	0.239354	0.350877	FC(c1ccccc1)(F)F	10	367	AR	NHR
3rll	3b68		2.76268	8.02144	0.31746	FC(c1ccccc1)(F)F	10	367	AR	NHR
2ax7	3b68		3.5414	0.751093	0.542373	O[C@](C(=O)Nc1ccc([N+](=O)[O-])cc1)(C)C	16	367	AR	NHR
2axa	3b5r		0.0152304	0.735029	0.357143	FC(c1ccccc1)(F)F	10	367	AR	NHR
3b5r	2axa	Yes	1.25784	1.33016	0.357143	FC(c1ccccc1)(F)F	10	367	AR	NHR
3b68	4ojb		1.19103	2.30214	0.333333	FC(c1ccccc1)(F)F	10	367	AR	NHR
4ojb	3b68	Yes	0.855276	0.827818	0.333333	FC(c1ccccc1)(F)F	10	367	AR	NHR
2ax8	2ax9		3.31468	1.58345	0.653061	O[C@](C(=O)Nc1ccc([N+](=O)[O-])cc1)(C)C	16	367	AR	NHR
2ax9	2ax8		1.35188	0.564015	0.653061	O[C@](C(=O)Nc1ccc([N+](=O)[O-])cc1)(C)C	16	367	AR	NHR
3l3x	2pnu	Yes	0.0167076	0.33893	0.754717	O[C@@H]1[C@@H]2[C@H]([C@H]3[C@@H]([C@@]4(C)CCC(=O)C[C@@H]4CC3)CC2)CC1	20	367	AR	NHR
1z95	3b68	Yes	0.853883	0.826993	0.333333	FC(c1ccccc1)(F)F	10	367	AR	NHR
2ax6	3v49		1.54567	1.4532	0.416667	FC(c1ccccc1)(F)F	10	367	AR	NHR
3rlj	2ax7	Yes	0.175106	0.281804	0.357143	FC(c1ccccc1)(F)F	10	367	AR	NHR
2ax7	3rlj		0.0357846	0.495332	0.357143	FC(c1ccccc1)(F)F	10	367	AR	NHR
3b5r	2ax7	Yes	1.29237	1.32577	0.357143	FC(c1ccccc1)(F)F	10	367	AR	NHR
2ax7	3b5r		0.411302	0.715467	0.357143	FC(c1ccccc1)(F)F	10	367	AR	NHR
3b65	2ax8		0.00456946	0.449651	0.490566	O[C@@](COc1ccccc1)(C=O)C	13	367	AR	NHR
2ax8	3b65		0.265524	0.678302	0.490566	O[C@@](COc1ccccc1)(C=O)C	13	367	AR	NHR
2ax6	4ojb		0.0603999	0.345014	0.408163	FC(c1ccccc1)(F)F	10	367	AR	NHR
2ax8	4ojb		0.0131529	0.774385	0.350877	FC(c1ccccc1)(F)F	10	367	AR	NHR
4ojb	2ax8	Yes	0.914566	0.666034	0.350877	FC(c1ccccc1)(F)F	10	367	AR	NHR
2piq	2pnu	Yes	0.014739	0.335477	0.754717	O[C@@H]1[C@@H]2[C@H]([C@H]3[C@@H]([C@@]4(C)CCC(=O)C[C@@H]4CC3)CC2)CC1	20	367	AR	NHR
3b5r	2ax8	Yes	1.29765	0.62778	0.357143	FC(c1ccccc1)(F)F	10	367	AR	NHR
2ax8	3b5r		0.0119134	0.733869	0.357143	FC(c1ccccc1)(F)F	10	367	AR	NHR
2pip	2pnu	Yes	0.00932483	0.337715	0.792453	O[C@@H]1[C@@]2([C@H]([C@H]3[C@@H]([C@]4(CCC(=O)C[C@@H]4CC3)C)CC2)CC1)C	21	367	AR	NHR
2ax7	3rll		0.0891413	0.549687	0.333333	FC(c1ccccc1)(F)F	10	367	AR	NHR
3rll	2ax7		2.02503	7.49614	0.333333	FC(c1ccccc1)(F)F	10	367	AR	NHR
3b5r	3b65	Yes	1.49469	0.487087	0.415094	O=CNc1ccc(C#N)cc1	11	367	AR	NHR
3b65	3b5r		1.10017	0.261106	0.415094	O=CNc1ccc(C#N)cc1	11	367	AR	NHR
2ax8	2ax6		3.47741		0.541667	O=[N+]([O-])c1c(C(F)(F)F)cccc1	13	367	AR	NHR
2ax6	2ax8		0.00686294	0.295523	0.541667	O=[N+]([O-])c1c(C(F)(F)F)cccc1	13	367	AR	NHR
1z95	3b5r	Yes	1.28062	0.925213	0.526316	O[C@](C(=O)Nc1ccc(C#N)cc1)(C)C	15	367	AR	NHR
2ax7	3v49		1.31224	1.30868	0.357143	FC(c1ccccc1)(F)F	10	367	AR	NHR
3v49	2ax7	Yes	0.177851	0.47914	0.357143	FC(c1ccccc1)(F)F	10	367	AR	NHR
2ax7	4ojb		0.0203891	0.771317	0.350877	FC(c1ccccc1)(F)F	10	367	AR	NHR
4ojb	2ax7	Yes	0.813233	0.803698	0.350877	FC(c1ccccc1)(F)F	10	367	AR	NHR
3v49	2ax9	Yes	1.61365		0.408163	FC(c1ccccc1)(F)F	10	367	AR	NHR
1z95	2axa	Yes	0.0113881	0.372352	0.350877	FC(c1ccccc1)(F)F	10	367	AR	NHR
2axa	1z95		0.0123578	0.817758	0.350877	FC(c1ccccc1)(F)F	10	367	AR	NHR
3rll	3b66		2.10961	7.06143	0.327869	FC(c1ccccc1)(F)F	10	367	AR	NHR
2pit	2pnu	Yes	0.019805	0.342446	0.754717	O[C@@H]1[C@@H]2[C@H]([C@H]3[C@@H]([C@@]4(C)CCC(=O)C[C@@H]4CC3)CC2)CC1	20	367	AR	NHR
3b5r	3b68	Yes	2.13678	1.56675	0.338983	FC(c1ccccc1)(F)F	10	367	AR	NHR
2amb	1xow	Yes	0.358862	0.570256	0.909091	O[C@@H]1[C@@]2(C)C=CC3=C4C(=CC(=O)CC4)CC[C@H]3[C@@H]2CC1	20	367	AR	NHR
1xow	2amb	Yes	0.010184	0.243381	0.909091	O[C@@H]1[C@@]2(C)C=CC3=C4C(=CC(=O)CC4)CC[C@H]3[C@@H]2CC1	20	367	AR	NHR
3b67	2ax6		2.93116		0.5	O=[N+]([O-])c1c(C(F)(F)F)cccc1	13	367	AR	NHR
2ax6	3b67		0.00763872	0.376446	0.5	O=[N+]([O-])c1c(C(F)(F)F)cccc1	13	367	AR	NHR
1t65	2pnu	Yes	0.0158415	0.339458	0.754717	O[C@@H]1[C@@H]2[C@H]([C@H]3[C@@H]([C@@]4(C)CCC(=O)C[C@@H]4CC3)CC2)CC1	20	367	AR	NHR
2axa	2ax6		3.47613		0.541667	O=[N+]([O-])c1c(C(F)(F)F)cccc1	13	367	AR	NHR
2ax6	2axa		0.00526783	0.364968	0.541667	O=[N+]([O-])c1c(C(F)(F)F)cccc1	13	367	AR	NHR
3rlj	3v49	Yes	1.61815	1.41647	0.357143	FC(c1ccccc1)(F)F	10	367	AR	NHR
3v49	3rlj	Yes	0.341956	0.627043	0.357143	FC(c1ccccc1)(F)F	10	367	AR	NHR
4k7a	2pnu	Yes	0.00941377	0.338204	0.754717	O[C@@H]1[C@@H]2[C@H]([C@H]3[C@@H]([C@@]4(C)CCC(=O)C[C@@H]4CC3)CC2)CC1	20	367	AR	NHR
2piv	2pnu	Yes	0.0210034	0.341417	0.754717	O[C@@H]1[C@@H]2[C@H]([C@H]3[C@@H]([C@@]4(C)CCC(=O)C[C@@H]4CC3)CC2)CC1	20	367	AR	NHR
2axa	2ax9		3.3151	1.51316	0.653061	O[C@](C(=O)Nc1ccc([N+](=O)[O-])cc1)(C)C	16	367	AR	NHR
2ax9	2axa		1.33791	0.536478	0.653061	O[C@](C(=O)Nc1ccc([N+](=O)[O-])cc1)(C)C	16	367	AR	NHR
2axa	3rll		0.0925882	0.550753	0.333333	FC(c1ccccc1)(F)F	10	367	AR	NHR
3rll	2axa		2.07552	7.33565	0.333333	FC(c1ccccc1)(F)F	10	367	AR	NHR
4ojb	3b66	Yes	0.877713	0.937443	0.344828	FC(c1ccccc1)(F)F	10	367	AR	NHR
3b5r	3b67	Yes	1.37027	1.29949	0.333333	FC(c1ccccc1)(F)F	10	367	AR	NHR
3b67	3b5r		0.717952	0.762472	0.333333	FC(c1ccccc1)(F)F	10	367	AR	NHR
1z95	3b67	Yes	0.967797	1.06106	0.327869	FC(c1ccccc1)(F)F	10	367	AR	NHR
3b67	1z95		1.7232	0.446434	0.327869	FC(c1ccccc1)(F)F	10	367	AR	NHR
2pio	2pnu	Yes	0.0142528	0.33867	0.754717	O[C@@H]1[C@@H]2[C@H]([C@H]3[C@@H]([C@@]4(C)CCC(=O)C[C@@H]4CC3)CC2)CC1	20	367	AR	NHR
3b5r	3rlj	Yes	1.25612	0.339901	0.678571	O=C(Nc1ccc(C#N)c(C(F)F)c1)[C@@](CO)(C)O	19	367	AR	NHR
3rlj	3b5r	Yes	0.380116	0.323317	0.678571	O=C(Nc1ccc(C#N)c(C(F)F)c1)[C@@](CO)(C)O	19	367	AR	NHR
1xq3	2amb	Yes	0.0113641	0.239598	0.909091	O[C@@H]1[C@@]2(C)C=CC3=C4C(=CC(=O)CC4)CC[C@H]3[C@@H]2CC1	20	367	AR	NHR
2amb	1xq3	Yes	0.422139	0.353458	0.909091	O[C@@H]1[C@@]2(C)C=CC3=C4C(=CC(=O)CC4)CC[C@H]3[C@@H]2CC1	20	367	AR	NHR
3b5r	4ojb	Yes	1.40644	1.08719	0.526316	O[C@](C(=O)Nc1ccc(C#N)cc1)(C)C	15	367	AR	NHR
4ojb	3b5r	Yes	0.991396	0.470814	0.526316	O[C@](C(=O)Nc1ccc(C#N)cc1)(C)C	15	367	AR	NHR
2ax6	1z95		0.728031	1.1735	0.408163	FC(c1ccccc1)(F)F	10	367	AR	NHR
2ax7	2ax6		3.47675		0.541667	O=[N+]([O-])c1c(C(F)(F)F)cccc1	13	367	AR	NHR
2ax6	2ax7		0.00516236	0.280818	0.541667	O=[N+]([O-])c1c(C(F)(F)F)cccc1	13	367	AR	NHR
3v49	3b66	Yes	0.338789	0.63514	0.350877	FC(c1ccccc1)(F)F	10	367	AR	NHR
3b65	4ojb		0.850971	0.412296	0.407407	O=CNc1ccc(C#N)cc1	11	367	AR	NHR
4ojb	3b65	Yes	2.38679	1.13601	0.407407	O=CNc1ccc(C#N)cc1	11	367	AR	NHR
2ax6	3rlj		0.0411345	0.272423	0.416667	FC(c1ccccc1)(F)F	10	367	AR	NHR
2axa	3v49		0.526839	0.909975	0.357143	FC(c1ccccc1)(F)F	10	367	AR	NHR
3v49	2axa	Yes	0.438198	0.713336	0.357143	FC(c1ccccc1)(F)F	10	367	AR	NHR
4oea	2pnu	Yes	0.0135154	0.340141	0.754717	O[C@@H]1[C@@H]2[C@H]([C@H]3[C@@H]([C@@]4(C)CCC(=O)C[C@@H]4CC3)CC2)CC1	20	367	AR	NHR
1z95	3b65	Yes	2.32857	0.939413	0.407407	O=CNc1ccc(C#N)cc1	11	367	AR	NHR
3b65	1z95		1.49802	0.279818	0.407407	O=CNc1ccc(C#N)cc1	11	367	AR	NHR
1z95	2ax9	Yes	2.94971		0.4	FC(c1ccccc1)(F)F	10	367	AR	NHR
2ax9	1z95		0.365659	0.244953	0.4	FC(c1ccccc1)(F)F	10	367	AR	NHR
2axa	3b65		0.264839	0.679035	0.490566	O[C@@](COc1ccccc1)(C=O)C	13	367	AR	NHR
3b65	2axa		0.00389358	0.222918	0.490566	O[C@@](COc1ccccc1)(C=O)C	13	367	AR	NHR
2ax9	3rll		0.0981508	1.00893	0.377358	FC(c1ccccc1)(F)F	10	367	AR	NHR
1z95	3rll	Yes	0.867709	1.30886	0.327869	FC(c1ccccc1)(F)F	10	367	AR	NHR
3rll	1z95		2.33774	6.98102	0.327869	FC(c1ccccc1)(F)F	10	367	AR	NHR
2ax9	4ojb		0.0509407	0.205213	0.4	FC(c1ccccc1)(F)F	10	367	AR	NHR
4ojb	2ax9	Yes	2.94946		0.4	FC(c1ccccc1)(F)F	10	367	AR	NHR
2piu	2pnu	Yes	0.0172585	0.339838	0.754717	O[C@@H]1[C@@H]2[C@H]([C@H]3[C@@H]([C@@]4(C)CCC(=O)C[C@@H]4CC3)CC2)CC1	20	367	AR	NHR
2ax7	2ax9		3.31995	1.59986	0.653061	O[C@](C(=O)Nc1ccc([N+](=O)[O-])cc1)(C)C	16	367	AR	NHR
2ax9	2ax7		1.23816	0.261588	0.653061	O[C@](C(=O)Nc1ccc([N+](=O)[O-])cc1)(C)C	16	367	AR	NHR
1z95	3b66	Yes	0.876091	0.936334	0.344828	FC(c1ccccc1)(F)F	10	367	AR	NHR
2axa	3b68		3.54667	0.737978	0.542373	O[C@](C(=O)Nc1ccc([N+](=O)[O-])cc1)(C)C	16	367	AR	NHR
1t63	2pnu	Yes	0.0140712	0.337578	0.754717	O[C@@H]1[C@@H]2[C@H]([C@H]3[C@@H]([C@@]4(C)CCC(=O)C[C@@H]4CC3)CC2)CC1	20	367	AR	NHR
3rll	4ojb		2.50674	6.87722	0.327869	FC(c1ccccc1)(F)F	10	367	AR	NHR
4ojb	3rll	Yes	0.86954	1.30895	0.327869	FC(c1ccccc1)(F)F	10	367	AR	NHR
3b68	3v49		2.04047		0.338983	FC(c1ccccc1)(F)F	10	367	AR	NHR
3v49	3b68	Yes	0.513325	0.844668	0.338983	FC(c1ccccc1)(F)F	10	367	AR	NHR
2ax8	3rll		0.0920687	0.549501	0.333333	FC(c1ccccc1)(F)F	10	367	AR	NHR
3rll	2ax8		2.71603	7.34049	0.333333	FC(c1ccccc1)(F)F	10	367	AR	NHR
2pir	2pnu	Yes	0.0157918	0.341974	0.754717	O[C@@H]1[C@@H]2[C@H]([C@H]3[C@@H]([C@@]4(C)CCC(=O)C[C@@H]4CC3)CC2)CC1	20	367	AR	NHR
3b68	3b67		1.37943	1.00431	0.412698	O=[N+]([O-])c1c(C(F)(F)F)cccc1	13	367	AR	NHR
3b67	3b68		0.150074	0.638301	0.412698	O=[N+]([O-])c1c(C(F)(F)F)cccc1	13	367	AR	NHR
2ama	2pnu	Yes	0.0223052	0.342046	0.754717	O[C@@H]1[C@@H]2[C@H]([C@H]3[C@@H]([C@@]4(C)CCC(=O)C[C@@H]4CC3)CC2)CC1	20	367	AR	NHR
3v49	3rll	Yes	1.63089	7.32181	0.333333	FC(c1ccccc1)(F)F	10	367	AR	NHR
3rll	3v49		2.96409		0.333333	FC(c1ccccc1)(F)F	10	367	AR	NHR
2ax9	3b68		1.34166	0.572564	0.615385	O[C@](C(=O)Nc1ccc([N+](=O)[O-])cc1)(C)C	16	367	AR	NHR
3b5r	3b66	Yes	1.25206	1.25074	0.350877	FC(c1ccccc1)(F)F	10	367	AR	NHR
2ax8	3b67		0.00880341	0.434255	0.433333	O=[N+]([O-])c1c(C(F)(F)F)cccc1	13	367	AR	NHR
3b67	2ax8		0.0122398	0.531232	0.433333	O=[N+]([O-])c1c(C(F)(F)F)cccc1	13	367	AR	NHR
2iyz	2iyr		0.976222	5.03789	0.714286	O[C@@H]1CC(=CCC1)C(=O)[O-]	10	887434	aroK	kinase
2iyr	2iyz	Yes	0.006733	0.415199	0.714286	O[C@@H]1CC(=CCC1)C(=O)[O-]	10	887434	aroK	kinase
2g1k	2iyz	Yes	0.00391578	0.414047	0.714286	O[C@@H]1CC(=CCC1)C(=O)[O-]	10	887434	aroK	kinase
2iyq	2iyz	Yes	0.00342783	0.414385	0.714286	O[C@@H]1CC(=CCC1)C(=O)[O-]	10	887434	aroK	kinase
2iyx	2iyy	Yes	0.00753879	0.720174	0.714286	O[C@@H]1CC(=CCC1)C(=O)[O-]	10	887434	aroK	kinase
2dfn	2iyz	Yes	0.86017	1.16529	0.714286	O[C@@H]1CC(=CCC1)C(=O)[O-]	10	887434	aroK	kinase
2iyz	1u8a		1.21497	0.517464	0.857143	O=C([O-])C1=C[C@H]([C@H]([C@@H](C1)O)O)O	12	887434	aroK	kinase
1u8a	2iyz	Yes	0.00620484	0.41227	0.857143	O=C([O-])C1=C[C@H]([C@H]([C@@H](C1)O)O)O	12	887434	aroK	kinase
1u8a	2iyy	Yes	0.721014	0.722254	0.714286	O[C@@H]1CC(=CCC1)C(=O)[O-]	10	887434	aroK	kinase
2iyy	1u8a		1.21633	4.76486	0.714286	O[C@@H]1CC(=CCC1)C(=O)[O-]	10	887434	aroK	kinase
2g1k	2iyy	Yes	0.00290115	0.718999	0.714286	O[C@@H]1CC(=CCC1)C(=O)[O-]	10	887434	aroK	kinase
2dfn	2iyy	Yes	1.06257	1.15657	0.714286	O[C@@H]1CC(=CCC1)C(=O)[O-]	10	887434	aroK	kinase
2iyr	2iyy	Yes	0.00560506	0.720636	0.714286	O[C@@H]1CC(=CCC1)C(=O)[O-]	10	887434	aroK	kinase
2iyy	2iyr		0.619938	5.22513	0.714286	O[C@@H]1CC(=CCC1)C(=O)[O-]	10	887434	aroK	kinase
2iyx	2iyz	Yes	0.00364005	0.412723	0.714286	O[C@@H]1CC(=CCC1)C(=O)[O-]	10	887434	aroK	kinase
3baf	2iyz	Yes	0.678146	1.16374	0.714286	O[C@@H]1CC(=CCC1)C(=O)[O-]	10	887434	aroK	kinase
2iyz	3baf		4.01021	1.83494	0.714286	O[C@@H]1CC(=CCC1)C(=O)[O-]	10	887434	aroK	kinase
2iyq	2iyy	Yes	0.759026	0.725732	0.714286	O[C@@H]1CC(=CCC1)C(=O)[O-]	10	887434	aroK	kinase
3baf	2iyy	Yes	1.06187	1.15545	0.714286	O[C@@H]1CC(=CCC1)C(=O)[O-]	10	887434	aroK	kinase
2iyy	3baf		4.00899	1.83156	0.714286	O[C@@H]1CC(=CCC1)C(=O)[O-]	10	887434	aroK	kinase
2y77	4b6q		9.07864	1.26251	0.346154	s1c2c(cc1)cccc2	9	888397	aroQ	other enzyme
4b6q	2y77	Yes	8.16766	0.553527	0.346154	s1c2c(cc1)cccc2	9	888397	aroQ	other enzyme
1h0r	2y71	Yes	0.382064	0.192145	0.611111	O=C[C@]1(C[C@H]([C@@H](C=C1)O)O)O	11	888397	aroQ	other enzyme
4b6q	4b6p	Yes	2.97864	6.72386	0.5	O[C@@]1(C=O)CC(=O)[C@H]([C@@H](C1)O)O	12	888397	aroQ	other enzyme
4b6p	4b6q		0.0174894	0.654062	0.5	O[C@@]1(C=O)CC(=O)[C@H]([C@@H](C1)O)O	12	888397	aroQ	other enzyme
4b6o	4b6q	Yes	0.714103	0.945121	0.533333	O[C@@]1(C=O)CC(=O)[C@H]([C@@H](C1)O)O	12	888397	aroQ	other enzyme
4b6q	4b6o	Yes	0.00566837	0.453754	0.533333	O[C@@]1(C=O)CC(=O)[C@H]([C@@H](C1)O)O	12	888397	aroQ	other enzyme
2xb8	4b6p	Yes	0.00553912	0.414749	0.510638	O[C@@]1(C=O)CC(=O)[C@H]([C@@H](C1)O)O	12	888397	aroQ	other enzyme
4b6p	2xb8		0.00493153	0.469422	0.510638	O[C@@]1(C=O)CC(=O)[C@H]([C@@H](C1)O)O	12	888397	aroQ	other enzyme
4ciw	2y71	Yes	0.00306594	1.03126	0.564103	O=C[C@]1(C[C@H]([C@@H](C=C1)O)O)O	11	888397	aroQ	other enzyme
4b6o	4b6p	Yes	0.00442102	1.91126	0.553191	[O-]C(=O)[C@H]1C[C@H]([C@@H](C(=O)[C@H]1C)O)O	13	888397	aroQ	other enzyme
4b6p	4b6o		0.275019	0.715471	0.553191	[O-]C(=O)[C@H]1C[C@H]([C@@H](C(=O)[C@H]1C)O)O	13	888397	aroQ	other enzyme
4b6q	2xb8	Yes	1.44427	0.509322	0.533333	O[C@@]1(C=O)CC(=O)[C@H]([C@@H](C1)O)O	12	888397	aroQ	other enzyme
2xb8	4b6q	Yes	0.238034	0.294437	0.533333	O[C@@]1(C=O)CC(=O)[C@H]([C@@H](C1)O)O	12	888397	aroQ	other enzyme
2y76	2y71		2.06199	1.87669	0.45614	O=C([O-])[C@]1(C[C@H]([C@@H](C(=C1)O)O)O)O	13	888397	aroQ	other enzyme
2y77	4ciy		2.53422	8.78625	0.48	O=C([O-])[C@]1(C[C@H]([C@@H](C=C1)O)O)O	12	888397	aroQ	other enzyme
4ciy	2y77	Yes	0.887846	1.82245	0.48	O=C([O-])[C@]1(C[C@H]([C@@H](C=C1)O)O)O	12	888397	aroQ	other enzyme
2y77	2y71		2.23993	9.80724	0.490566	O=C([O-])[C@]1(C[C@H]([C@@H](C(=C1)O)O)O)O	13	888397	aroQ	other enzyme
2y76	4ciw		0.185169	1.64104	0.5	O=C([O-])[C@]1(C[C@H]([C@@H](C=C1)O)O)O	12	888397	aroQ	other enzyme
4ciw	2y76	Yes	0.709058	1.11803	0.5	O=C([O-])[C@]1(C[C@H]([C@@H](C=C1)O)O)O	12	888397	aroQ	other enzyme
2y77	2y76		0.526568	1.26903	0.451613	O=C([O-])[C@]1(C[C@H]([C@@H](C(=C1C)O)O)O)O	14	888397	aroQ	other enzyme
2y76	2y77		1.75087	3.369	0.451613	O=C([O-])[C@]1(C[C@H]([C@@H](C(=C1C)O)O)O)O	14	888397	aroQ	other enzyme
4ciy	4ciw	Yes	0.0106055	0.473729	0.611111	O=C[C@]1(C[C@H]([C@@H](C=C1)O)O)O	11	888397	aroQ	other enzyme
4ciw	4ciy	Yes	1.27887	0.331331	0.611111	O=C[C@]1(C[C@H]([C@@H](C=C1)O)O)O	11	888397	aroQ	other enzyme
2y77	4ciw		4.02223	7.32034	0.545455	O=C([O-])[C@]1(C[C@H]([C@@H](C=C1)O)O)O	12	888397	aroQ	other enzyme
4ciw	2y77	Yes	0.490291	1.22033	0.545455	O=C([O-])[C@]1(C[C@H]([C@@H](C=C1)O)O)O	12	888397	aroQ	other enzyme
4ciw	1h0r	Yes	0.482782	0.907499	0.888889	O=C([O-])[C@]1(C[C@H]([C@@H](C=C1)O)O)O	12	888397	aroQ	other enzyme
1h0r	4ciw	Yes	0.00572276	0.463073	0.888889	O=C([O-])[C@]1(C[C@H]([C@@H](C=C1)O)O)O	12	888397	aroQ	other enzyme
4ciy	2y71	Yes	0.92025	0.494555	0.488889	O=C[C@]1(C[C@H]([C@@H](C=C1)O)O)O	11	888397	aroQ	other enzyme
2y76	4ciy		1.2314	6.3267	0.444444	O=C([O-])[C@]1(C[C@H]([C@@H](C=C1)O)O)O	12	888397	aroQ	other enzyme
4ciy	2y76	Yes	0.283219	1.69486	0.444444	O=C([O-])[C@]1(C[C@H]([C@@H](C=C1)O)O)O	12	888397	aroQ	other enzyme
4ciy	1h0r	Yes	3.51414	1.56474	0.727273	O=C([O-])[C@]1(C[C@H]([C@@H](C=C1)O)O)O	12	888397	aroQ	other enzyme
1h0r	4ciy	Yes	0.00410284	0.339783	0.727273	O=C([O-])[C@]1(C[C@H]([C@@H](C=C1)O)O)O	12	888397	aroQ	other enzyme
4b6q	2y76	Yes	0.370905	0.291876	0.357143	Cc1ccc2sccc2c1	10	888397	aroQ	other enzyme
2y77	1h0r		5.43417	7.14395	0.585366	O=C([O-])[C@]1(C[C@H]([C@@H](C=C1)O)O)O	12	888397	aroQ	other enzyme
3w2c	3w18	Yes	1.67855	1.93898	0.545455	[nH]1[n]c(c2c1cccc2)c1[nH]c2c([n]1)cccc2	18	6790	AURKA	kinase
3w18	3w2c	Yes	1.79156	1.92343	0.545455	[nH]1[n]c(c2c1cccc2)c1[nH]c2c([n]1)cccc2	18	6790	AURKA	kinase
2c6d	2wqe		1.41115	1.59279	0.814815	O=P(OC[C@H]1O[C@@H]([n]2c[n]c3c(N)[n]c[n]c23)C[C@@H]1O)([O-])O	22	6790	AURKA	kinase
2wqe	2c6d		1.04927	1.32818	0.814815	O=P(OC[C@H]1O[C@@H]([n]2c[n]c3c(N)[n]c[n]c23)C[C@@H]1O)([O-])O	22	6790	AURKA	kinase
2dwb	4dee		1.1058	8.19036	0.758621	O=P(OC[C@H]1O[C@@H]([n]2c[n]c3c(N)[n]c[n]c23)C[C@@H]1O)([O-])O	22	6790	AURKA	kinase
4dee	2dwb		0.0802362	8.51038	0.758621	O=P(OC[C@H]1O[C@@H]([n]2c[n]c3c(N)[n]c[n]c23)C[C@@H]1O)([O-])O	22	6790	AURKA	kinase
2dwb	1ol5		0.846673	7.56604	0.758621	O=P(OC[C@H]1O[C@@H]([n]2c[n]c3c(N)[n]c[n]c23)C[C@@H]1O)([O-])O	22	6790	AURKA	kinase
1ol5	2dwb		0.0795387	8.51105	0.758621	O=P(OC[C@H]1O[C@@H]([n]2c[n]c3c(N)[n]c[n]c23)C[C@@H]1O)([O-])O	22	6790	AURKA	kinase
2dwb	1mq4		1.12835	7.99792	0.758621	O=P(OC[C@H]1O[C@@H]([n]2c[n]c3c(N)[n]c[n]c23)C[C@@H]1O)([O-])O	22	6790	AURKA	kinase
1mq4	2dwb		0.0793016	8.51161	0.758621	O=P(OC[C@H]1O[C@@H]([n]2c[n]c3c(N)[n]c[n]c23)C[C@@H]1O)([O-])O	22	6790	AURKA	kinase
3uod	2np8	Yes	1.63182	0.915887	0.350877	FC(c1ccccc1)(F)F	10	6790	AURKA	kinase
2dwb	2wqe		2.02665	4.73318	0.758621	O=P(OC[C@H]1O[C@@H]([n]2c[n]c3c(N)[n]c[n]c23)C[C@@H]1O)([O-])O	22	6790	AURKA	kinase
2wqe	2dwb		1.47125	8.06576	0.758621	O=P(OC[C@H]1O[C@@H]([n]2c[n]c3c(N)[n]c[n]c23)C[C@@H]1O)([O-])O	22	6790	AURKA	kinase
1tw5	1nmm	Yes	1.52994	3.65197	0.545455	N[C@H]1[C@@H](O[C@H](CO)[C@H]([C@@H]1O)O)O	12	281781	B4GALT1	other
1nwg	4krv	Yes	0.731114	6.13613	0.666667	N[C@H]1[C@@H](O[C@H](CO)[C@H]([C@@H]1O)O)O	12	281781	B4GALT1	other
4krv	1nwg	Yes	0.883533	1.83699	0.666667	N[C@H]1[C@@H](O[C@H](CO)[C@H]([C@@H]1O)O)O	12	281781	B4GALT1	other
1nwg	1pzy	Yes	1.17018	6.51901	0.9375	O=C(N[C@H]1[C@@H](O[C@H](CO)[C@H]([C@@H]1O)O)O)C	15	281781	B4GALT1	other
1pzy	1nwg	Yes	0.520861	0.475284	0.9375	O=C(N[C@H]1[C@@H](O[C@H](CO)[C@H]([C@@H]1O)O)O)C	15	281781	B4GALT1	other
4krv	1nqi	Yes	0.00297357	2.0432	0.882353	O=C(N[C@H]1[C@@H](O[C@H](CO)[C@H]([C@@H]1O)O)O)C	15	281781	B4GALT1	other
1nqi	4krv	Yes	0.461461	0.990413	0.882353	O=C(N[C@H]1[C@@H](O[C@H](CO)[C@H]([C@@H]1O)O)O)C	15	281781	B4GALT1	other
2fyd	1nqi	Yes	0.00417333	6.76295	0.740741	OC[C@H]1O[C@H](C[C@@H](O)C1)O	10	281781	B4GALT1	other
1nqi	2fyd	Yes	1.58854	0.812804	0.740741	OC[C@H]1O[C@H](C[C@@H](O)C1)O	10	281781	B4GALT1	other
1tw5	1nqi	Yes	1.98212	4.2701	0.545455	N[C@H]1[C@@H](O[C@H](CO)[C@H]([C@@H]1O)O)O	12	281781	B4GALT1	other
2fyd	1nwg	Yes	0.358086	6.61198	0.689655	OC[C@H]1O[C@H](C[C@@H](O)C1)O	10	281781	B4GALT1	other
1nwg	2fyd	Yes	1.44791	2.09379	0.689655	OC[C@H]1O[C@H](C[C@@H](O)C1)O	10	281781	B4GALT1	other
1pzy	1nf5	Yes	0.00262043	2.71088	0.740741	OC[C@H]1O[C@H](C[C@@H](O)C1)O	10	281781	B4GALT1	other
1nf5	1pzy	Yes	0.563147	5.32051	0.740741	OC[C@H]1O[C@H](C[C@@H](O)C1)O	10	281781	B4GALT1	other
2fyd	1nmm	Yes	0.00525198	6.96372	0.740741	OC[C@H]1O[C@H](C[C@@H](O)C1)O	10	281781	B4GALT1	other
1nmm	2fyd	Yes	1.60005	0.793698	0.740741	OC[C@H]1O[C@H](C[C@@H](O)C1)O	10	281781	B4GALT1	other
1nwg	1nqi	Yes	0.57066	7.14819	0.75	N[C@H]1[C@@H](O[C@H](CO)[C@H]([C@@H]1O)O)O	12	281781	B4GALT1	other
1nqi	1nwg	Yes	0.513348	0.473672	0.75	N[C@H]1[C@@H](O[C@H](CO)[C@H]([C@@H]1O)O)O	12	281781	B4GALT1	other
1nmm	1nf5	Yes	0.00364234	2.71115	0.740741	OC[C@H]1O[C@H](C[C@@H](O)C1)O	10	281781	B4GALT1	other
1nf5	1nmm	Yes	0.013537	6.96603	0.740741	OC[C@H]1O[C@H](C[C@@H](O)C1)O	10	281781	B4GALT1	other
4krv	1nmm	Yes	0.335801	1.98402	0.705882	N[C@H]1[C@@H](O[C@H](CO)[C@H]([C@@H]1O)O)O	12	281781	B4GALT1	other
1nmm	4krv	Yes	0.274312	0.994945	0.705882	N[C@H]1[C@@H](O[C@H](CO)[C@H]([C@@H]1O)O)O	12	281781	B4GALT1	other
4krv	1nf5	Yes	1.18139	4.26687	0.580645	O[C@@H]1OC[C@H]([C@@H](C1)O)O	9	281781	B4GALT1	other
1nf5	4krv	Yes	0.517496	5.82596	0.580645	O[C@@H]1OC[C@H]([C@@H](C1)O)O	9	281781	B4GALT1	other
1tw5	4krv	Yes	1.73375	1.41676	0.5	N[C@H]1[C@@H](O[C@H](CO)[C@H]([C@@H]1O)O)O	12	281781	B4GALT1	other
1nwg	1nmm	Yes	0.511264	1.52432	0.75	N[C@H]1[C@@H](O[C@H](CO)[C@H]([C@@H]1O)O)O	12	281781	B4GALT1	other
1nmm	1nwg	Yes	0.518408	0.475081	0.75	N[C@H]1[C@@H](O[C@H](CO)[C@H]([C@@H]1O)O)O	12	281781	B4GALT1	other
1tw5	1pzy	Yes	1.91377	6.15147	0.545455	N[C@H]1[C@@H](O[C@H](CO)[C@H]([C@@H]1O)O)O	12	281781	B4GALT1	other
1nqi	1nf5	Yes	0.0051251	2.71076	0.740741	OC[C@H]1O[C@H](C[C@@H](O)C1)O	10	281781	B4GALT1	other
1nf5	1nqi	Yes	0.00436845	6.7615	0.740741	OC[C@H]1O[C@H](C[C@@H](O)C1)O	10	281781	B4GALT1	other
1pzy	4krv	Yes	0.525221	0.88417	0.705882	N[C@H]1[C@@H](O[C@H](CO)[C@H]([C@@H]1O)O)O	12	281781	B4GALT1	other
4krv	1pzy	Yes	1.32208	5.61373	0.705882	N[C@H]1[C@@H](O[C@H](CO)[C@H]([C@@H]1O)O)O	12	281781	B4GALT1	other
1pzy	2fyd	Yes	1.59202	0.803746	0.740741	OC[C@H]1O[C@H](C[C@@H](O)C1)O	10	281781	B4GALT1	other
2fyd	1pzy	Yes	0.00549242	5.48324	0.740741	OC[C@H]1O[C@H](C[C@@H](O)C1)O	10	281781	B4GALT1	other
2fyd	4krv	Yes	0.514677	5.82069	0.580645	O[C@@H]1OC[C@H]([C@@H](C1)O)O	9	281781	B4GALT1	other
4krv	2fyd	Yes	1.5716	1.89056	0.580645	O[C@@H]1OC[C@H]([C@@H](C1)O)O	9	281781	B4GALT1	other
1tw5	1nwg	Yes	2.51847	3.96178	0.521739	N[C@H]1[C@@H](O[C@H](CO)[C@H]([C@@H]1O)O)O	12	281781	B4GALT1	other
1nwg	1nf5	Yes	0.936791	2.50471	0.689655	OC[C@H]1O[C@H](C[C@@H](O)C1)O	10	281781	B4GALT1	other
1nf5	1nwg	Yes	0.355022	6.60793	0.689655	OC[C@H]1O[C@H](C[C@@H](O)C1)O	10	281781	B4GALT1	other
3ahv	3sco	Yes	0.00219504	0.358895	0.869565	OC[C@H]1OCC[C@H]([C@@H]1O)O	10	4333841	BGLU7	other enzyme
3ahv	3scs	Yes	0.0201697	0.518436	0.869565	OC[C@H]1OCC[C@H]([C@@H]1O)O	10	4333841	BGLU7	other enzyme
2rgm	3scs	Yes	0.00785088	0.517563	0.869565	OC[C@H]1OCC[C@H]([C@@H]1O)O	10	4333841	BGLU7	other enzyme
3scs	2rgm	Yes	0.605238	3.39117	0.869565	OC[C@H]1OCC[C@H]([C@@H]1O)O	10	4333841	BGLU7	other enzyme
3f5l	3sco	Yes	1.03258	6.17185	0.514286	O[C@@H]1[C@@H](O)COC[C@H]1O	9	4333841	BGLU7	other enzyme
3ahv	3scq	Yes	0.429072	0.353985	0.869565	OC[C@H]1OCC[C@H]([C@@H]1O)O	10	4333841	BGLU7	other enzyme
3sco	2rgm	Yes	0.555457	3.41209	0.869565	OC[C@H]1OCC[C@H]([C@@H]1O)O	10	4333841	BGLU7	other enzyme
2rgm	3scq	Yes	0.428638	0.352453	0.869565	OC[C@H]1OCC[C@H]([C@@H]1O)O	10	4333841	BGLU7	other enzyme
3scq	2rgm	Yes	0.584901	3.39309	0.869565	OC[C@H]1OCC[C@H]([C@@H]1O)O	10	4333841	BGLU7	other enzyme
3f5l	3scq	Yes	0.998612	6.05095	0.514286	O[C@@H]1[C@@H](O)COC[C@H]1O	9	4333841	BGLU7	other enzyme
3ahv	3f5l	Yes	0.605361	3.91219	0.588235	OC[C@H]1OCC[C@H]([C@@H]1O)O	10	4333841	BGLU7	other enzyme
2rgm	3f5l	Yes	0.608892	3.91297	0.588235	OC[C@H]1OCC[C@H]([C@@H]1O)O	10	4333841	BGLU7	other enzyme
3f5l	3scs	Yes	2.16007	6.16801	0.514286	O[C@@H]1[C@@H](O)COC[C@H]1O	9	4333841	BGLU7	other enzyme
4eyb	4ram		3.73731	8.55112	0.384615	O=C([O-])[C@@H]1[NH2+]CSC1(C)C	10	11934636	blaNDM-1	other enzyme
4ram	4eyb		2.666	6.57888	0.384615	O=C([O-])[C@@H]1[NH2+]CSC1(C)C	10	11934636	blaNDM-1	other enzyme
4hl2	4eyb		0.611311	7.28774	0.592593	[O-]C(=O)[C@@H](NC=O)[C@H]1SC([C@@H]([NH2+]1)C=O)(C)C	16	11934636	blaNDM-1	other enzyme
4eyb	4hl2		0.871897	8.50402	0.592593	[O-]C(=O)[C@@H](NC=O)[C@H]1SC([C@@H]([NH2+]1)C=O)(C)C	16	11934636	blaNDM-1	other enzyme
4h0d	4ey2		1.74878	10.7937	0.615385	[O-]C(=O)[C@@H](NC=O)[C@H]1SC([C@@H]([NH2+]1)C=O)(C)C	16	11934636	blaNDM-1	other enzyme
4hl1	4eyb		2.41946	7.163	0.392157	O=C([O-])[C@@H]1[NH2+]CSC1(C)C	10	11934636	blaNDM-1	other enzyme
4eyb	4hl1		3.73898	9.59178	0.392157	O=C([O-])[C@@H]1[NH2+]CSC1(C)C	10	11934636	blaNDM-1	other enzyme
4ey2	4hl2		0.783646	8.50074	0.615385	[O-]C(=O)[C@@H](NC=O)[C@H]1SC([C@@H]([NH2+]1)C=O)(C)C	16	11934636	blaNDM-1	other enzyme
4hl2	4ey2		0.705715	10.5851	0.615385	[O-]C(=O)[C@@H](NC=O)[C@H]1SC([C@@H]([NH2+]1)C=O)(C)C	16	11934636	blaNDM-1	other enzyme
4eyb	3q6x		1.38417	8.57468	0.592593	[O-]C(=O)[C@@H](NC=O)[C@H]1SC([C@@H]([NH2+]1)C=O)(C)C	16	11934636	blaNDM-1	other enzyme
3q6x	4eyb		0.600877	7.22994	0.592593	[O-]C(=O)[C@@H](NC=O)[C@H]1SC([C@@H]([NH2+]1)C=O)(C)C	16	11934636	blaNDM-1	other enzyme
4hl1	4ram		2.81639	10.0583	0.8	O=C(NC[C@H]1SC(C[NH2+]1)(C)C)Cc1ccccc1	18	11934636	blaNDM-1	other enzyme
4eyf	4eyb		0.662625	8.33755	0.603774	[O-]C(=O)[C@@H](NC=O)[C@H]1SC([C@@H]([NH2+]1)C=O)(C)C	16	11934636	blaNDM-1	other enzyme
4eyb	4eyf		1.1837	9.30883	0.603774	[O-]C(=O)[C@@H](NC=O)[C@H]1SC([C@@H]([NH2+]1)C=O)(C)C	16	11934636	blaNDM-1	other enzyme
4eyf	4ey2		2.44177	6.08379	0.627451	[O-]C(=O)[C@@H](NC=O)[C@H]1SC([C@@H]([NH2+]1)C=O)(C)C	16	11934636	blaNDM-1	other enzyme
4ey2	4eyf		0.0416004	8.78273	0.627451	[O-]C(=O)[C@@H](NC=O)[C@H]1SC([C@@H]([NH2+]1)C=O)(C)C	16	11934636	blaNDM-1	other enzyme
4ey2	4ram		2.38972	8.70502	0.4	O=C([O-])[C@@H]1[NH2+]CSC1(C)C	10	11934636	blaNDM-1	other enzyme
4ram	4ey2		3.11303	6.27089	0.4	O=C([O-])[C@@H]1[NH2+]CSC1(C)C	10	11934636	blaNDM-1	other enzyme
4h0d	4eyf		1.12674	9.6416	0.938776	[O-]C(=O)[C@@H]1[NH2+][C@H](SC1(C)C)[C@H](NC(=O)Cc1ccccc1)C=O	23	11934636	blaNDM-1	other enzyme
4hl1	4ey2		0.272288	6.23149	0.408163	O=C([O-])[C@@H]1[NH2+]CSC1(C)C	10	11934636	blaNDM-1	other enzyme
4ey2	4hl1		3.23971	9.64827	0.408163	O=C([O-])[C@@H]1[NH2+]CSC1(C)C	10	11934636	blaNDM-1	other enzyme
4h0d	4ram		0.608645	8.89557	0.958333	[O-]C(=O)[C@@H]1[NH2+][C@H](SC1(C)C)[C@H](NC(=O)Cc1ccccc1)C=O	23	11934636	blaNDM-1	other enzyme
4ram	4h0d		1.21493	8.61797	0.958333	[O-]C(=O)[C@@H]1[NH2+][C@H](SC1(C)C)[C@H](NC(=O)Cc1ccccc1)C=O	23	11934636	blaNDM-1	other enzyme
4ey2	3q6x		0.886303	9.11547	0.615385	[O-]C(=O)[C@@H](NC=O)[C@H]1SC([C@@H]([NH2+]1)C=O)(C)C	16	11934636	blaNDM-1	other enzyme
3q6x	4ey2		0.258269	10.5769	0.615385	[O-]C(=O)[C@@H](NC=O)[C@H]1SC([C@@H]([NH2+]1)C=O)(C)C	16	11934636	blaNDM-1	other enzyme
4ey2	4eyb		0.739262	8.76752	0.571429	[O-]C(=O)[C@@H](NC=O)[C@H]1SC([C@@H]([NH2+]1)C=O)(C)C	16	11934636	blaNDM-1	other enzyme
4eyb	4ey2		1.88376	9.09706	0.571429	[O-]C(=O)[C@@H](NC=O)[C@H]1SC([C@@H]([NH2+]1)C=O)(C)C	16	11934636	blaNDM-1	other enzyme
4eyf	3q6x		1.09346	6.38751	0.938776	[O-]C(=O)[C@@H]1[NH2+][C@H](SC1(C)C)[C@H](NC(=O)Cc1ccccc1)C=O	23	11934636	blaNDM-1	other enzyme
3q6x	4eyf		1.16417	9.6606	0.938776	[O-]C(=O)[C@@H]1[NH2+][C@H](SC1(C)C)[C@H](NC(=O)Cc1ccccc1)C=O	23	11934636	blaNDM-1	other enzyme
4hl1	4eyf		2.82127	9.66308	0.782609	O=C(NC[C@H]1SC(C[NH2+]1)(C)C)Cc1ccccc1	18	11934636	blaNDM-1	other enzyme
4hl2	4ram		0.6119	8.91706	0.958333	[O-]C(=O)[C@@H]1[NH2+][C@H](SC1(C)C)[C@H](NC(=O)Cc1ccccc1)C=O	23	11934636	blaNDM-1	other enzyme
4ram	4hl2		0.924183	8.31497	0.958333	[O-]C(=O)[C@@H]1[NH2+][C@H](SC1(C)C)[C@H](NC(=O)Cc1ccccc1)C=O	23	11934636	blaNDM-1	other enzyme
4h0d	4eyb		0.629913	7.16006	0.592593	[O-]C(=O)[C@@H](NC=O)[C@H]1SC([C@@H]([NH2+]1)C=O)(C)C	16	11934636	blaNDM-1	other enzyme
3q6x	4ram		0.614014	8.89478	0.958333	[O-]C(=O)[C@@H]1[NH2+][C@H](SC1(C)C)[C@H](NC(=O)Cc1ccccc1)C=O	23	11934636	blaNDM-1	other enzyme
4ram	3q6x		1.13631	8.3762	0.958333	[O-]C(=O)[C@@H]1[NH2+][C@H](SC1(C)C)[C@H](NC(=O)Cc1ccccc1)C=O	23	11934636	blaNDM-1	other enzyme
4a9m	4alh	Yes	0.854654	2.0103	0.722222	Cc1o[n]c(c1c1ccccc1)C	13	6046	BRD2	other
4alh	4a9m	Yes	0.822307	2.47509	0.722222	Cc1o[n]c(c1c1ccccc1)C	13	6046	BRD2	other
4uyg	4a9h	Yes	1.04956	7.88821	0.622222	O=C(N1[C@H](CCc2c1cccc2)C)C	14	6046	BRD2	other
4a9h	4uyg	Yes	0.0213508	4.19825	0.622222	O=C(N1[C@H](CCc2c1cccc2)C)C	14	6046	BRD2	other
4a9o	4a9m	Yes	0.152193	2.94869	0.702703	Cc1o[n]c(c1c1ccccc1)C	13	6046	BRD2	other
4a9n	4a9o	Yes	4.79452	5.55373	0.742857	Cc1o[n]c(c1c1ccccc1)C	13	6046	BRD2	other
4a9o	4a9n	Yes	0.0533151	2.97957	0.742857	Cc1o[n]c(c1c1ccccc1)C	13	6046	BRD2	other
4uyh	4a9h		0.859709	9.24	0.583333	O=C(N1[C@H](CCc2c1cccc2)C)C	14	6046	BRD2	other
4a9h	4uyh	Yes	0.00762046	0.685286	0.583333	O=C(N1[C@H](CCc2c1cccc2)C)C	14	6046	BRD2	other
4uyf	4a9h	Yes	0.0373216	7.85344	0.622222	O=C(N1[C@H](CCc2c1cccc2)C)C	14	6046	BRD2	other
4a9h	4uyf	Yes	0.045399	5.06932	0.622222	O=C(N1[C@H](CCc2c1cccc2)C)C	14	6046	BRD2	other
4a9o	4alh	Yes	0.00645866	2.9427	0.888889	Cc1o[n]cc1c1ccccc1	12	6046	BRD2	other
4alh	4a9o	Yes	0.0184808	2.3769	0.888889	Cc1o[n]cc1c1ccccc1	12	6046	BRD2	other
4a9m	4a9n	Yes	2.07957	1.07753	0.454545	Cc1c(S(=O)=O)cccc1	10	6046	BRD2	other
4a9n	4a9m	Yes	1.78202	2.15019	0.454545	Cc1c(S(=O)=O)cccc1	10	6046	BRD2	other
4a9n	4alh	Yes	0.925619	1.99794	0.764706	Cc1o[n]c(c1c1ccccc1)C	13	6046	BRD2	other
4alh	4a9n	Yes	0.00728539	2.41589	0.764706	Cc1o[n]c(c1c1ccccc1)C	13	6046	BRD2	other
4hxs	4hxn	Yes	8.01683	7.77279	0.666667	O=c1scc([nH]1)c1ccccc1	12	23476	BRD4	other
4hxn	4hxs	Yes	0.0149743	6.38802	0.666667	O=c1scc([nH]1)c1ccccc1	12	23476	BRD4	other
4hbv	4e96	Yes	0.0177915	2.62824	0.594595	O=C1NCc2c(N1)cccc2	11	23476	BRD4	other
4e96	4hbv	Yes	4.10046	3.02231	0.594595	O=C1NCc2c(N1)cccc2	11	23476	BRD4	other
4hxm	4hxn	Yes	3.94338	2.03085	0.6	O=c1scc([nH]1)c1ccccc1	12	23476	BRD4	other
4hxn	4hxm	Yes	0.0106987	6.41547	0.6	O=c1scc([nH]1)c1ccccc1	12	23476	BRD4	other
4a9l	4e96	Yes	0.739319	6.5626	0.521739	O=C1N(Cc2c(N1)cccc2)C	12	23476	BRD4	other
4e96	4a9l	Yes	1.93468	1.69282	0.521739	O=C1N(Cc2c(N1)cccc2)C	12	23476	BRD4	other
4e96	4nud	Yes	7.86632	2.3005	0.392157	NS(=O)(=O)c1ccccc1	10	23476	BRD4	other
4nud	4e96		8.79589	5.05852	0.392157	NS(=O)(=O)c1ccccc1	10	23476	BRD4	other
4hbx	4a9l	Yes	0.0122311	2.18259	0.714286	CN1C(=O)Nc2c(C1)cc(S(=O)=O)cc2	15	23476	BRD4	other
4a9l	4hbx	Yes	0.0128435	4.66343	0.714286	CN1C(=O)Nc2c(C1)cc(S(=O)=O)cc2	15	23476	BRD4	other
4nue	4nud		3.54348	3.4886	0.654545	N=Nc1ccc(S(=O)(=O)Nc2[n]cccc2)cc1	18	23476	BRD4	other
4nud	4nue		3.22429	5.1243	0.654545	N=Nc1ccc(S(=O)(=O)Nc2[n]cccc2)cc1	18	23476	BRD4	other
4hbx	4hbv	Yes	2.49188	2.64331	0.666667	O=C1NCc2c(N1)cccc2	11	23476	BRD4	other
4hbv	4hbx	Yes	0.0115192	2.90455	0.666667	O=C1NCc2c(N1)cccc2	11	23476	BRD4	other
4hbx	4e96	Yes	0.993914	2.67323	0.5	O=C1NCc2c(N1)cccc2	11	23476	BRD4	other
4e96	4hbx	Yes	0.0316787	3.62051	0.5	O=C1NCc2c(N1)cccc2	11	23476	BRD4	other
4hxs	4hxm	Yes	6.5216	7.55432	0.64	O=c1scc([nH]1)c1cc(NS(=O)=O)ccc1	16	23476	BRD4	other
4hxm	4hxs	Yes	6.84588	1.56286	0.64	O=c1scc([nH]1)c1cc(NS(=O)=O)ccc1	16	23476	BRD4	other
4j0r	4j0s	Yes	1.75536	0.407617	0.636364	Oc1cc(Cc2ccccc2)ccc1	14	23476	BRD4	other
4j0s	4j0r	Yes	1.73175	1.75401	0.636364	Oc1cc(Cc2ccccc2)ccc1	14	23476	BRD4	other
4o7f	4o7b	Yes	1.57694	1.69546	0.333333	[NH2+]1CCC([n]2c[n]cc2)CC1	11	23476	BRD4	other
4o7b	4o7f	Yes	0.0284184	0.518497	0.333333	[NH2+]1CCC([n]2c[n]cc2)CC1	11	23476	BRD4	other
2yel	3u5j	Yes	2.69118	3.85287	0.555556	Cc1[n]2c3c(C=NCc2[n][n]1)cccc3	15	23476	BRD4	other
3u5j	2yel	Yes	0.0386099	1.01189	0.555556	Cc1[n]2c3c(C=NCc2[n][n]1)cccc3	15	23476	BRD4	other
4a9l	4hbv	Yes	3.40036	6.64582	0.685714	O=C1N(Cc2c(N1)cccc2)C	12	23476	BRD4	other
4hbv	4a9l	Yes	0.0140658	2.80023	0.685714	O=C1N(Cc2c(N1)cccc2)C	12	23476	BRD4	other
3ieo	3ibl	Yes	1.72459	5.75967	0.947368	O=C([O-])c1ccccc1	9	760	CA2	other
2q1b	3ibl	Yes	1.42318	6.7157	0.947368	O=C([O-])c1ccccc1	9	760	CA2	other
3ffp	2aw1	Yes	0.0458972	6.05479	0.947368	O=C([O-])c1ccccc1	9	760	CA2	other
3m2y	3ibu	Yes	0.199635	5.945	0.947368	O=C([O-])c1ccccc1	9	760	CA2	other
3m2y	2aw1	Yes	0.0432666	6.13186	0.947368	O=C([O-])c1ccccc1	9	760	CA2	other
2q38	3v5g	Yes	0.152926	6.60079	0.947368	O=C([O-])c1ccccc1	9	760	CA2	other
3ffp	2hd6	Yes	0.045913	5.43606	0.947368	O=C([O-])c1ccccc1	9	760	CA2	other
3f8e	3v5g	Yes	0.282395	6.69272	0.947368	O=C([O-])c1ccccc1	9	760	CA2	other
2q1b	3ibu	Yes	0.308937	5.95112	0.947368	O=C([O-])c1ccccc1	9	760	CA2	other
3ffp	2f14	Yes	0.261982	5.74549	0.947368	O=C([O-])c1ccccc1	9	760	CA2	other
3m2y	3ibl	Yes	0.0156773	5.59214	0.947368	O=C([O-])c1ccccc1	9	760	CA2	other
3f8e	3ibu	Yes	0.960459	5.17899	0.947368	O=C([O-])c1ccccc1	9	760	CA2	other
3f8e	2hl4	Yes	0.129308	7.01884	0.947368	O=C([O-])c1ccccc1	9	760	CA2	other
3f8e	3t5z	Yes	0.00977525	5.52403	0.947368	O=C([O-])c1ccccc1	9	760	CA2	other
2q1b	2qo8	Yes	0.158593	4.92805	0.947368	O=C([O-])c1ccccc1	9	760	CA2	other
2q38	2qp6	Yes	1.33139	5.34878	0.947368	O=C([O-])c1ccccc1	9	760	CA2	other
3ffp	3t5u	Yes	0.0650607	5.85883	0.947368	O=C([O-])c1ccccc1	9	760	CA2	other
3f8e	2hoc	Yes	0.01363	6.13888	0.947368	O=C([O-])c1ccccc1	9	760	CA2	other
3m2y	2hnc	Yes	0.0633754	6.35218	0.947368	O=C([O-])c1ccccc1	9	760	CA2	other
3m2y	3caj	Yes	0.08005	5.5735	0.947368	O=C([O-])c1ccccc1	9	760	CA2	other
3ieo	2hnc	Yes	0.889319	9.77737	0.947368	O=C([O-])c1ccccc1	9	760	CA2	other
2q1b	3v5g	Yes	0.290007	6.60016	0.947368	O=C([O-])c1ccccc1	9	760	CA2	other
3ieo	3caj	Yes	0.854206	5.69233	0.947368	O=C([O-])c1ccccc1	9	760	CA2	other
3f8e	3caj	Yes	0.018806	5.55655	0.947368	O=C([O-])c1ccccc1	9	760	CA2	other
2q38	3ibl	Yes	0.115966	5.70927	0.947368	O=C([O-])c1ccccc1	9	760	CA2	other
2q38	2f14	Yes	0.134386	5.6851	0.947368	O=C([O-])c1ccccc1	9	760	CA2	other
3ffp	2qp6	Yes	0.830734	5.40353	0.842105	O=Cc1ccccc1	8	760	CA2	other
3ffp	3t5z	Yes	0.0126754	5.5226	0.947368	O=C([O-])c1ccccc1	9	760	CA2	other
3ieo	3ibi	Yes	0.91229	6.16352	0.947368	O=C([O-])c1ccccc1	9	760	CA2	other
2q1b	2hl4	Yes	0.0798492	6.98553	0.947368	O=C([O-])c1ccccc1	9	760	CA2	other
2q1b	2aw1	Yes	0.131688	6.02831	0.947368	O=C([O-])c1ccccc1	9	760	CA2	other
3ffp	3c7p	Yes	0.107168	5.30875	0.947368	O=C([O-])c1ccccc1	9	760	CA2	other
3m2y	2hd6	Yes	0.0978849	5.39017	0.947368	O=C([O-])c1ccccc1	9	760	CA2	other
3m2y	3ibi	Yes	0.117955	5.76241	0.842105	O=Cc1ccccc1	8	760	CA2	other
2q38	3ibu	Yes	0.160802	5.88752	0.947368	O=C([O-])c1ccccc1	9	760	CA2	other
2q38	2qoa	Yes	1.82388	9.92767	0.947368	O=C([O-])c1ccccc1	9	760	CA2	other
3f8e	2hnc	Yes	0.0083666	9.83941	0.947368	O=C([O-])c1ccccc1	9	760	CA2	other
3ieo	2hl4	Yes	1.84305	6.2495	0.947368	O=C([O-])c1ccccc1	9	760	CA2	other
3ieo	2qo8	Yes	1.93369	4.95642	0.842105	O=Cc1ccccc1	8	760	CA2	other
3m2y	3t5u	Yes	0.0842714	5.86435	0.947368	O=C([O-])c1ccccc1	9	760	CA2	other
3ffp	2hl4	Yes	0.044932	7.0112	0.947368	O=C([O-])c1ccccc1	9	760	CA2	other
3ieo	3t5u	Yes	1.52388	5.72854	0.947368	O=C([O-])c1ccccc1	9	760	CA2	other
2q38	2aw1	Yes	0.085505	6.05109	0.947368	O=C([O-])c1ccccc1	9	760	CA2	other
3m2y	3t5z	Yes	0.0130128	5.52319	0.947368	O=C([O-])c1ccccc1	9	760	CA2	other
3ffp	3v5g	Yes	0.116791	6.62239	0.947368	O=C([O-])c1ccccc1	9	760	CA2	other
3ffp	3mnu	Yes	0.0708927	6.12657	0.947368	O=C([O-])c1ccccc1	9	760	CA2	other
2q38	2hl4	Yes	0.0824581	7.02307	0.947368	O=C([O-])c1ccccc1	9	760	CA2	other
3ffp	2hnc	Yes	0.025865	9.83482	0.947368	O=C([O-])c1ccccc1	9	760	CA2	other
2q1b	2qp6	Yes	2.24056	5.33919	0.842105	O=Cc1ccccc1	8	760	CA2	other
3ffp	3ibu	Yes	0.192833	5.93472	0.947368	O=C([O-])c1ccccc1	9	760	CA2	other
3f8e	3t5u	Yes	0.463735	5.91277	0.947368	O=C([O-])c1ccccc1	9	760	CA2	other
3ieo	2aw1	Yes	0.940231	6.35974	0.842105	O=Cc1ccccc1	8	760	CA2	other
3ieo	2hoc	Yes	0.330758	5.99319	0.947368	O=C([O-])c1ccccc1	9	760	CA2	other
3f8e	2f14	Yes	0.396919	5.39013	0.947368	O=C([O-])c1ccccc1	9	760	CA2	other
3f8e	2qoa	Yes	0.0352688	9.43642	0.947368	O=C([O-])c1ccccc1	9	760	CA2	other
3ffp	2hoc	Yes	0.010651	6.13782	0.947368	O=C([O-])c1ccccc1	9	760	CA2	other
3f8e	3ibl	Yes	0.147886	5.71878	0.947368	O=C([O-])c1ccccc1	9	760	CA2	other
2q1b	2f14	Yes	0.64154	5.85146	0.842105	O=Cc1ccccc1	8	760	CA2	other
3f8e	2qo8	Yes	0.126358	4.89603	0.947368	O=C([O-])c1ccccc1	9	760	CA2	other
3f8e	2hd6	Yes	0.47836	5.60039	0.947368	O=C([O-])c1ccccc1	9	760	CA2	other
2q1b	3t5u	Yes	0.188248	5.88391	0.947368	O=C([O-])c1ccccc1	9	760	CA2	other
3m2y	2hoc	Yes	0.00653197	6.1356	0.947368	O=C([O-])c1ccccc1	9	760	CA2	other
3m2y	2qo8	Yes	0.0584513	4.87945	0.947368	O=C([O-])c1ccccc1	9	760	CA2	other
3ieo	3mnu	Yes	1.53023	6.20856	0.947368	O=C([O-])c1ccccc1	9	760	CA2	other
2q1b	2hnc	Yes	1.76097	10.0657	0.947368	O=C([O-])c1ccccc1	9	760	CA2	other
3ieo	2f14	Yes	2.32371	5.25898	0.947368	O=C([O-])c1ccccc1	9	760	CA2	other
3ffp	2qo8	Yes	0.130458	4.78342	0.947368	O=C([O-])c1ccccc1	9	760	CA2	other
2q38	3t5z	Yes	0.0118837	5.52592	0.947368	O=C([O-])c1ccccc1	9	760	CA2	other
3f8e	3c7p	Yes	0.0678036	5.30157	0.842105	O=Cc1ccccc1	8	760	CA2	other
3ieo	2hd6	Yes	1.86196	5.60128	0.947368	O=C([O-])c1ccccc1	9	760	CA2	other
2q38	2hoc	Yes	0.0120784	6.13228	0.842105	O=Cc1ccccc1	8	760	CA2	other
3ieo	3c7p	Yes	1.02547	5.2318	0.947368	O=C([O-])c1ccccc1	9	760	CA2	other
2q1b	3ibi	Yes	0.192689	6.21864	0.947368	O=C([O-])c1ccccc1	9	760	CA2	other
2q1b	3mnu	Yes	0.207226	6.25737	0.947368	O=C([O-])c1ccccc1	9	760	CA2	other
3ieo	3ibu	Yes	2.48005	5.05611	0.842105	O=Cc1ccccc1	8	760	CA2	other
3f8e	3mnu	Yes	0.201003	6.05237	0.947368	O=C([O-])c1ccccc1	9	760	CA2	other
2q1b	2qoa	Yes	1.92719	10.148	0.947368	O=C([O-])c1ccccc1	9	760	CA2	other
2q38	3ibi	Yes	0.194668	6.21694	0.947368	O=C([O-])c1ccccc1	9	760	CA2	other
2q38	2hd6	Yes	0.0471852	5.45129	0.947368	O=C([O-])c1ccccc1	9	760	CA2	other
2q38	3c7p	Yes	0.249749	5.37409	0.842105	O=Cc1ccccc1	8	760	CA2	other
2q38	3mnu	Yes	0.216514	6.25735	0.947368	O=C([O-])c1ccccc1	9	760	CA2	other
2q38	2hnc	Yes	1.55441	9.91481	0.947368	O=C([O-])c1ccccc1	9	760	CA2	other
3ieo	2qp6	Yes	0.0269279	5.32821	0.947368	O=C([O-])c1ccccc1	9	760	CA2	other
3ffp	2qoa	Yes	0.10997	9.46214	0.947368	O=C([O-])c1ccccc1	9	760	CA2	other
3m2y	3c7p	Yes	0.162406	5.34071	0.842105	O=Cc1ccccc1	8	760	CA2	other
2q1b	2hoc	Yes	0.0255734	6.14573	0.947368	O=C([O-])c1ccccc1	9	760	CA2	other
2q38	3caj	Yes	1.41721	5.46693	0.842105	O=Cc1ccccc1	8	760	CA2	other
2q1b	2hd6	Yes	0.144916	5.38079	0.947368	O=C([O-])c1ccccc1	9	760	CA2	other
3m2y	2f14	Yes	0.300579	5.77701	0.947368	O=C([O-])c1ccccc1	9	760	CA2	other
3m2y	2qp6	Yes	0.919847	5.47601	0.842105	O=Cc1ccccc1	8	760	CA2	other
3f8e	2qp6	Yes	0.752902	5.31342	0.947368	O=C([O-])c1ccccc1	9	760	CA2	other
2q38	3t5u	Yes	0.20861	5.85472	0.947368	O=C([O-])c1ccccc1	9	760	CA2	other
2q38	2qo8	Yes	0.232502	4.73936	0.842105	O=Cc1ccccc1	8	760	CA2	other
3ffp	3ibi	Yes	0.106224	6.17526	0.947368	O=C([O-])c1ccccc1	9	760	CA2	other
3f8e	2aw1	Yes	0.170826	6.07635	0.947368	O=C([O-])c1ccccc1	9	760	CA2	other
3m2y	2qoa	Yes	0.126346	9.47706	0.842105	O=Cc1ccccc1	8	760	CA2	other
3m2y	3mnu	Yes	0.124758	6.46949	0.947368	O=C([O-])c1ccccc1	9	760	CA2	other
3f8e	3ibi	Yes	0.0362445	6.12718	0.947368	O=C([O-])c1ccccc1	9	760	CA2	other
2q1b	3t5z	Yes	0.820498	5.29611	0.947368	O=C([O-])c1ccccc1	9	760	CA2	other
3ffp	3ibl	Yes	0.0654718	5.72071	0.947368	O=C([O-])c1ccccc1	9	760	CA2	other
2q1b	3caj	Yes	1.54433	5.3514	0.842105	O=Cc1ccccc1	8	760	CA2	other
3ieo	3v5g	Yes	1.69501	5.82521	0.842105	O=Cc1ccccc1	8	760	CA2	other
3ieo	3t5z	Yes	1.55518	5.47649	0.842105	O=Cc1ccccc1	8	760	CA2	other
3ffp	3caj	Yes	0.0392287	5.56512	0.842105	O=Cc1ccccc1	8	760	CA2	other
3m2y	3v5g	Yes	0.291012	6.62969	0.842105	O=Cc1ccccc1	8	760	CA2	other
2q1b	3c7p	Yes	0.240211	5.37262	0.842105	O=Cc1ccccc1	8	760	CA2	other
3m2y	2hl4	Yes	0.0271907	5.04841	0.842105	O=Cc1ccccc1	8	760	CA2	other
3ieo	2qoa	Yes	0.819651	8.80183	0.842105	O=Cc1ccccc1	8	760	CA2	other
3c0h	3mfr	Yes	5.27634	8.6458	0.857143	Nc1[n]c[n]c2[n](c[n]c12)[C@@H]1O[C@@H](C[C@H]1O)CO	18	8573	CASK	kinase
3mfr	3c0h	Yes	5.70976	1.75982	0.857143	Nc1[n]c[n]c2[n](c[n]c12)[C@@H]1O[C@@H](C[C@H]1O)CO	18	8573	CASK	kinase
3c0i	3mfs	Yes	4.03761	2.97711	0.666667	Nc1[n]c[n]c2[n](c[n]c12)[C@@H]1O[C@@H](C[C@H]1O)CO	18	8573	CASK	kinase
3c0g	3mfu	Yes	4.08595	3.64504	0.666667	Nc1[n]c[n]c2[n](c[n]c12)[C@@H]1O[C@@H](C[C@H]1O)CO	18	8573	CASK	kinase
3mfu	3c0g		5.42338	4.04471	0.666667	Nc1[n]c[n]c2[n](c[n]c12)[C@@H]1O[C@@H](C[C@H]1O)CO	18	8573	CASK	kinase
3c0h	3c0g	Yes	4.19524	4.82669	0.782609	Nc1[n]c[n]c2[n](c[n]c12)[C@@H]1O[C@@H](C[C@H]1O)CO	18	8573	CASK	kinase
3c0g	3c0h	Yes	6.29633	1.44439	0.782609	Nc1[n]c[n]c2[n](c[n]c12)[C@@H]1O[C@@H](C[C@H]1O)CO	18	8573	CASK	kinase
3c0g	3mfs	Yes	4.01455	2.44974	0.666667	Nc1[n]c[n]c2[n](c[n]c12)[C@@H]1O[C@@H](C[C@H]1O)CO	18	8573	CASK	kinase
3c0h	3mfu	Yes	0.647861	2.32056	0.666667	Nc1[n]c[n]c2[n](c[n]c12)[C@@H]1O[C@@H](C[C@H]1O)CO	18	8573	CASK	kinase
3mfu	3c0h		2.5986	3.84346	0.666667	Nc1[n]c[n]c2[n](c[n]c12)[C@@H]1O[C@@H](C[C@H]1O)CO	18	8573	CASK	kinase
3c0i	3mfu	Yes	4.15808	3.82172	0.666667	Nc1[n]c[n]c2[n](c[n]c12)[C@@H]1O[C@@H](C[C@H]1O)CO	18	8573	CASK	kinase
3c0h	3c0i	Yes	4.11733	4.79714	0.782609	Nc1[n]c[n]c2[n](c[n]c12)[C@@H]1O[C@@H](C[C@H]1O)CO	18	8573	CASK	kinase
3c0i	3c0h	Yes	5.49528	1.20271	0.782609	Nc1[n]c[n]c2[n](c[n]c12)[C@@H]1O[C@@H](C[C@H]1O)CO	18	8573	CASK	kinase
3c0i	3mfr	Yes	2.72228	6.8105	0.857143	Nc1[n]c[n]c2[n](c[n]c12)[C@@H]1O[C@@H](C[C@H]1O)CO	18	8573	CASK	kinase
3mfr	3c0i	Yes	2.76139	2.96311	0.857143	Nc1[n]c[n]c2[n](c[n]c12)[C@@H]1O[C@@H](C[C@H]1O)CO	18	8573	CASK	kinase
3c0h	3mfs	Yes	2.03664	0.651701	0.666667	Nc1[n]c[n]c2[n](c[n]c12)[C@@H]1O[C@@H](C[C@H]1O)CO	18	8573	CASK	kinase
3mfs	3c0h		2.52919	4.23913	0.666667	Nc1[n]c[n]c2[n](c[n]c12)[C@@H]1O[C@@H](C[C@H]1O)CO	18	8573	CASK	kinase
3c0g	3mfr	Yes	2.50434	6.9351	0.857143	Nc1[n]c[n]c2[n](c[n]c12)[C@@H]1O[C@@H](C[C@H]1O)CO	18	8573	CASK	kinase
3mfr	3c0g	Yes	2.7392	6.52592	0.857143	Nc1[n]c[n]c2[n](c[n]c12)[C@@H]1O[C@@H](C[C@H]1O)CO	18	8573	CASK	kinase
3p5e	3p7h	Yes	0.451137	8.11197	0.628571	OC[C@H]1O[C@@H](C[C@H]([C@@H]1O)O)O	11	50489	CD207	other
4n36	4n38	Yes	0.473253	0.972227	0.933333	O=C(N[C@H]1CO[C@H](CO)[C@H]([C@@H]1O)O)C	14	50489	CD207	other
4n38	4n36	Yes	0.965961	8.37309	0.933333	O=C(N[C@H]1CO[C@H](CO)[C@H]([C@@H]1O)O)C	14	50489	CD207	other
4n38	4n34	Yes	0.758412	8.79978	0.866667	O=CN[C@H]1CO[C@H](CO)[C@H]([C@@H]1O)O	13	50489	CD207	other
4n34	4n38	Yes	0.485192	0.988519	0.866667	O=CN[C@H]1CO[C@H](CO)[C@H]([C@@H]1O)O	13	50489	CD207	other
4n35	4n36	Yes	0.649353	8.28868	0.866667	O=CN[C@H]1CO[C@H](CO)[C@H]([C@@H]1O)O	13	50489	CD207	other
4n36	4n35	Yes	0.46466	3.13685	0.866667	O=CN[C@H]1CO[C@H](CO)[C@H]([C@@H]1O)O	13	50489	CD207	other
3p5h	4n32	Yes	4.40831	8.73268	0.714286	OC[C@H]1OCC[C@H]([C@@H]1O)O	10	50489	CD207	other
4n32	3p5h	Yes	5.3811		0.714286	OC[C@H]1OCC[C@H]([C@@H]1O)O	10	50489	CD207	other
3p7g	3p7h	Yes	0.450118	8.11203	0.628571	OC[C@H]1O[C@@H](C[C@H]([C@@H]1O)O)O	11	50489	CD207	other
3p5d	3p7h	Yes	0.155095	7.06403	0.588235	OC[C@H]1OCC[C@H]([C@@H]1O)O	10	50489	CD207	other
4n37	3p5h	Yes	4.02396	6.72168	0.8	OC[C@H]1OCC[C@H]([C@@H]1O)O	10	50489	CD207	other
3p5h	4n37	Yes	4.05806	8.16862	0.8	OC[C@H]1OCC[C@H]([C@@H]1O)O	10	50489	CD207	other
3p5d	4n36	Yes	0.638251	7.16759	0.740741	OC[C@H]1OCC[C@H]([C@@H]1O)O	10	50489	CD207	other
4n36	3p5d	Yes	1.37577		0.740741	OC[C@H]1OCC[C@H]([C@@H]1O)O	10	50489	CD207	other
3p7g	4n33	Yes	0.0924671	1.02311	0.769231	OC[C@H]1OCC[C@H]([C@@H]1O)O	10	50489	CD207	other
4n33	3p7g	Yes	0.988884	7.80638	0.769231	OC[C@H]1OCC[C@H]([C@@H]1O)O	10	50489	CD207	other
4n36	4n33	Yes	0.493524	5.70613	0.933333	O=C(N[C@H]1CO[C@H](CO)[C@H]([C@@H]1O)O)C	14	50489	CD207	other
4n33	4n36	Yes	0.659794	8.29031	0.933333	O=C(N[C@H]1CO[C@H](CO)[C@H]([C@@H]1O)O)C	14	50489	CD207	other
4n33	4n34	Yes	0.471911	8.75001	0.866667	O=CN[C@H]1CO[C@H](CO)[C@H]([C@@H]1O)O	13	50489	CD207	other
4n34	4n33	Yes	0.49171	5.6929	0.866667	O=CN[C@H]1CO[C@H](CO)[C@H]([C@@H]1O)O	13	50489	CD207	other
4n37	3p7g	Yes	0.0756561	7.17401	0.96	OC[C@H]1O[C@H](O)[C@H]([C@H]([C@@H]1O)O)O	12	50489	CD207	other
3p7g	4n37	Yes	0.0545329	7.65788	0.96	OC[C@H]1O[C@H](O)[C@H]([C@H]([C@@H]1O)O)O	12	50489	CD207	other
3p5g	3p5f	Yes	2.80994	7.1109	0.818182	O[C@@H]1[C@H](O)COC[C@H]1O	9	50489	CD207	other
3p5e	3p5h	Yes	3.98595	8.0205	0.833333	OC[C@H]1OCC[C@H]([C@@H]1O)O	10	50489	CD207	other
3p5h	3p5e	Yes	4.30174	8.52957	0.833333	OC[C@H]1OCC[C@H]([C@@H]1O)O	10	50489	CD207	other
4n38	3p5e	Yes	1.66447	7.352	0.769231	OC[C@H]1OCC[C@H]([C@@H]1O)O	10	50489	CD207	other
3p5e	4n38	Yes	0.989324	3.79488	0.769231	OC[C@H]1OCC[C@H]([C@@H]1O)O	10	50489	CD207	other
3p5g	4n37	Yes	2.91856	5.12432	0.782609	O[C@@H]1[C@H](O)COC[C@H]1O	9	50489	CD207	other
4n33	4n32	Yes	0.423684	6.63271	0.866667	O=CN[C@H]1CO[C@H](CO)[C@H]([C@@H]1O)O	13	50489	CD207	other
4n32	4n33	Yes	0.490059	5.70684	0.866667	O=CN[C@H]1CO[C@H](CO)[C@H]([C@@H]1O)O	13	50489	CD207	other
3p5h	4n35	Yes	4.04786	3.04827	0.769231	OC[C@H]1OCC[C@H]([C@@H]1O)O	10	50489	CD207	other
4n35	3p5h	Yes	5.23609		0.769231	OC[C@H]1OCC[C@H]([C@@H]1O)O	10	50489	CD207	other
4n34	3p5f	Yes	1.57317		0.785714	OC[C@H]1O[C@@H](C[C@H]([C@@H]1O)O)O	11	50489	CD207	other
3p5f	4n34	Yes	0.731564	6.08833	0.785714	OC[C@H]1O[C@@H](C[C@H]([C@@H]1O)O)O	11	50489	CD207	other
4n37	4n34	Yes	0.540431	8.19741	0.689655	CO[C@H]1OC[C@H]([C@@H](C1)O)O	10	50489	CD207	other
4n34	4n37	Yes	0.566022		0.689655	CO[C@H]1OC[C@H]([C@@H](C1)O)O	10	50489	CD207	other
3p5f	3p7h	Yes	0.42237	8.09523	0.628571	OC[C@H]1O[C@@H](C[C@H]([C@@H]1O)O)O	11	50489	CD207	other
4n37	4n32	Yes	0.617896	7.50088	0.689655	CO[C@H]1OC[C@H]([C@@H](C1)O)O	10	50489	CD207	other
4n32	4n37	Yes	0.569807		0.689655	CO[C@H]1OC[C@H]([C@@H](C1)O)O	10	50489	CD207	other
3p7g	4n35	Yes	0.634954	3.39329	0.769231	OC[C@H]1OCC[C@H]([C@@H]1O)O	10	50489	CD207	other
4n35	3p7g	Yes	0.988308	7.80615	0.769231	OC[C@H]1OCC[C@H]([C@@H]1O)O	10	50489	CD207	other
3p5f	4n32	Yes	0.557368	7.98227	0.785714	OC[C@H]1O[C@@H](C[C@H]([C@@H]1O)O)O	11	50489	CD207	other
4n32	3p5f	Yes	1.57869		0.785714	OC[C@H]1O[C@@H](C[C@H]([C@@H]1O)O)O	11	50489	CD207	other
3p7g	4n34	Yes	0.732946	6.09099	0.785714	OC[C@H]1O[C@@H](C[C@H]([C@@H]1O)O)O	11	50489	CD207	other
4n34	3p7g	Yes	0.881519		0.785714	OC[C@H]1O[C@@H](C[C@H]([C@@H]1O)O)O	11	50489	CD207	other
3p7g	4n36	Yes	1.47911	7.41493	0.785714	OC[C@H]1O[C@@H](C[C@H]([C@@H]1O)O)O	11	50489	CD207	other
4n36	3p7g	Yes	0.882619		0.785714	OC[C@H]1O[C@@H](C[C@H]([C@@H]1O)O)O	11	50489	CD207	other
4n37	3p7h	Yes	1.09106	7.81434	0.611111	OC[C@H]1O[C@@H](C[C@H]([C@@H]1O)O)O	11	50489	CD207	other
4n34	4n35	Yes	0.466169	3.1462	0.866667	O=CN[C@H]1CO[C@H](CO)[C@H]([C@@H]1O)O	13	50489	CD207	other
4n35	4n34	Yes	0.00959166	8.75332	0.866667	O=CN[C@H]1CO[C@H](CO)[C@H]([C@@H]1O)O	13	50489	CD207	other
3p5h	4n36	Yes	4.31685	5.76097	0.714286	OC[C@H]1OCC[C@H]([C@@H]1O)O	10	50489	CD207	other
4n36	3p5h	Yes	5.37934		0.714286	OC[C@H]1OCC[C@H]([C@@H]1O)O	10	50489	CD207	other
3p5e	4n36	Yes	1.47511	7.41695	0.785714	OC[C@H]1O[C@@H](C[C@H]([C@@H]1O)O)O	11	50489	CD207	other
4n36	3p5e	Yes	1.46804		0.785714	OC[C@H]1O[C@@H](C[C@H]([C@@H]1O)O)O	11	50489	CD207	other
3p5d	4n32	Yes	0.604675	7.92234	0.740741	OC[C@H]1OCC[C@H]([C@@H]1O)O	10	50489	CD207	other
4n32	3p5d	Yes	1.37331		0.740741	OC[C@H]1OCC[C@H]([C@@H]1O)O	10	50489	CD207	other
4n32	4n38	Yes	0.493826	1.0116	0.933333	O=C(N[C@H]1CO[C@H](CO)[C@H]([C@@H]1O)O)C	14	50489	CD207	other
4n38	4n32	Yes	0.970683	6.72095	0.933333	O=C(N[C@H]1CO[C@H](CO)[C@H]([C@@H]1O)O)C	14	50489	CD207	other
4n32	3p7h	Yes	0.0785959	6.4395	0.564103	OC[C@H]1O[C@@H](C[C@H]([C@@H]1O)O)O	11	50489	CD207	other
4n37	3p5e	Yes	1.08852	6.89548	0.88	OC[C@H]1O[C@@H](C[C@H]([C@@H]1O)O)O	11	50489	CD207	other
3p5e	4n37	Yes	0.05867	7.65982	0.88	OC[C@H]1O[C@@H](C[C@H]([C@@H]1O)O)O	11	50489	CD207	other
4n34	3p7h	Yes	0.439787	6.444	0.564103	OC[C@H]1O[C@@H](C[C@H]([C@@H]1O)O)O	11	50489	CD207	other
4n38	3p5f	Yes	0.674498	8.00166	0.769231	OC[C@H]1OCC[C@H]([C@@H]1O)O	10	50489	CD207	other
3p5f	4n38	Yes	0.988633	3.7977	0.769231	OC[C@H]1OCC[C@H]([C@@H]1O)O	10	50489	CD207	other
3p5f	3p5h	Yes	3.98472	8.01747	0.833333	OC[C@H]1OCC[C@H]([C@@H]1O)O	10	50489	CD207	other
3p5h	3p5f	Yes	4.33966	9.38908	0.833333	OC[C@H]1OCC[C@H]([C@@H]1O)O	10	50489	CD207	other
4n37	3p5f	Yes	0.697301	6.84564	0.88	OC[C@H]1O[C@@H](C[C@H]([C@@H]1O)O)O	11	50489	CD207	other
3p5f	4n37	Yes	0.0539529	7.64977	0.88	OC[C@H]1O[C@@H](C[C@H]([C@@H]1O)O)O	11	50489	CD207	other
4n37	4n33	Yes	0.0284551	3.71638	0.740741	OC[C@H]1OCC[C@H]([C@@H]1O)O	10	50489	CD207	other
4n33	4n37	Yes	0.0596687		0.740741	OC[C@H]1OCC[C@H]([C@@H]1O)O	10	50489	CD207	other
3p5e	4n32	Yes	0.556979	7.98284	0.785714	OC[C@H]1O[C@@H](C[C@H]([C@@H]1O)O)O	11	50489	CD207	other
4n32	3p5e	Yes	1.46969		0.785714	OC[C@H]1O[C@@H](C[C@H]([C@@H]1O)O)O	11	50489	CD207	other
3p5i	3p5h	Yes	3.13894	6.15713	0.740741	OC[C@H]1OC[C@@H]([C@H](C1)O)O	10	50489	CD207	other
3p5h	3p5i	Yes	2.92199	4.47416	0.740741	OC[C@H]1OC[C@@H]([C@H](C1)O)O	10	50489	CD207	other
4n33	3p5e	Yes	1.80505	7.30096	0.769231	OC[C@H]1OCC[C@H]([C@@H]1O)O	10	50489	CD207	other
3p5e	4n33	Yes	0.0994749	1.02495	0.769231	OC[C@H]1OCC[C@H]([C@@H]1O)O	10	50489	CD207	other
4n36	3p7h	Yes	0.0869084	6.45599	0.564103	OC[C@H]1O[C@@H](C[C@H]([C@@H]1O)O)O	11	50489	CD207	other
4n38	3p5h	Yes	5.20711		0.769231	OC[C@H]1OCC[C@H]([C@@H]1O)O	10	50489	CD207	other
3p5h	4n38	Yes	4.01303	4.24891	0.769231	OC[C@H]1OCC[C@H]([C@@H]1O)O	10	50489	CD207	other
4n34	3p5h	Yes	5.38407		0.714286	OC[C@H]1OCC[C@H]([C@@H]1O)O	10	50489	CD207	other
3p5h	4n34	Yes	4.25725	5.65588	0.714286	OC[C@H]1OCC[C@H]([C@@H]1O)O	10	50489	CD207	other
4n38	4n37	Yes	0.783234		0.740741	OC[C@H]1OCC[C@H]([C@@H]1O)O	10	50489	CD207	other
4n37	4n38	Yes	0.981505	1.07616	0.740741	OC[C@H]1OCC[C@H]([C@@H]1O)O	10	50489	CD207	other
4n38	3p7h	Yes	0.629942	7.24528	0.540541	OC[C@H]1OCC[C@H]([C@@H]1O)O	10	50489	CD207	other
4n37	3p5d	Yes	0.295571	6.5917	0.916667	OC[C@H]1OC[C@@H](O)[C@H]([C@@H]1O)O	11	50489	CD207	other
3p5d	4n37	Yes	0.965843	7.88814	0.916667	OC[C@H]1OC[C@@H](O)[C@H]([C@@H]1O)O	11	50489	CD207	other
4n35	3p7h	Yes	0.475054	7.5057	0.540541	OC[C@H]1OCC[C@H]([C@@H]1O)O	10	50489	CD207	other
3p5d	4n35	Yes	0.314582	5.6414	0.72	OC[C@H]1OCCC[C@@H]1O	9	50489	CD207	other
4n35	3p5d	Yes	0.395919	8.73438	0.72	OC[C@H]1OCCC[C@@H]1O	9	50489	CD207	other
3p5g	3p7g	Yes	2.85292	5.01372	0.818182	O[C@@H]1[C@H](O)COC[C@H]1O	9	50489	CD207	other
3p5d	4n38	Yes	0.616013	3.47563	0.72	OC[C@H]1OCCC[C@@H]1O	9	50489	CD207	other
4n38	3p5d	Yes	1.12119	9.30888	0.72	OC[C@H]1OCCC[C@@H]1O	9	50489	CD207	other
4n33	3p5h	Yes	5.23832		0.769231	OC[C@H]1OCC[C@H]([C@@H]1O)O	10	50489	CD207	other
3p5h	4n33	Yes	4.27657	4.65075	0.769231	OC[C@H]1OCC[C@H]([C@@H]1O)O	10	50489	CD207	other
4n34	3p5e	Yes	1.46986		0.785714	OC[C@H]1O[C@@H](C[C@H]([C@@H]1O)O)O	11	50489	CD207	other
3p5e	4n34	Yes	0.733503	6.08926	0.785714	OC[C@H]1O[C@@H](C[C@H]([C@@H]1O)O)O	11	50489	CD207	other
4n33	3p5f	Yes	0.0944518	7.88711	0.769231	OC[C@H]1OCC[C@H]([C@@H]1O)O	10	50489	CD207	other
3p5f	4n33	Yes	0.078475	1.02213	0.769231	OC[C@H]1OCC[C@H]([C@@H]1O)O	10	50489	CD207	other
3p5d	4n33	Yes	0.00726761	5.40133	0.72	OC[C@H]1OCCC[C@@H]1O	9	50489	CD207	other
4n33	3p5d	Yes	0.395078	8.71748	0.72	OC[C@H]1OCCC[C@@H]1O	9	50489	CD207	other
3p5g	3p5e	Yes	2.81286	7.6196	0.818182	O[C@@H]1[C@H](O)COC[C@H]1O	9	50489	CD207	other
3p7g	4n38	Yes	1.09195	3.71436	0.769231	OC[C@H]1OCC[C@H]([C@@H]1O)O	10	50489	CD207	other
4n38	3p7g	Yes	1.17507	7.95676	0.769231	OC[C@H]1OCC[C@H]([C@@H]1O)O	10	50489	CD207	other
3p7g	3p5h	Yes	3.9464	8.02527	0.833333	OC[C@H]1OCC[C@H]([C@@H]1O)O	10	50489	CD207	other
3p5h	3p7g	Yes	4.26737	8.09995	0.833333	OC[C@H]1OCC[C@H]([C@@H]1O)O	10	50489	CD207	other
4n35	4n32	Yes	0.413311	6.63249	0.866667	O=CN[C@H]1CO[C@H](CO)[C@H]([C@@H]1O)O	13	50489	CD207	other
4n32	4n35	Yes	0.465467	3.14354	0.866667	O=CN[C@H]1CO[C@H](CO)[C@H]([C@@H]1O)O	13	50489	CD207	other
4n37	4n36	Yes	0.656674	7.76416	0.689655	CO[C@H]1OC[C@H]([C@@H](C1)O)O	10	50489	CD207	other
4n36	4n37	Yes	0.564344		0.689655	CO[C@H]1OC[C@H]([C@@H](C1)O)O	10	50489	CD207	other
3p5d	4n34	Yes	1.04537	6.8684	0.740741	OC[C@H]1OCC[C@H]([C@@H]1O)O	10	50489	CD207	other
4n34	3p5d	Yes	1.38908		0.740741	OC[C@H]1OCC[C@H]([C@@H]1O)O	10	50489	CD207	other
3p7g	4n32	Yes	0.560254	7.98764	0.785714	OC[C@H]1O[C@@H](C[C@H]([C@@H]1O)O)O	11	50489	CD207	other
4n32	3p7g	Yes	0.882868		0.785714	OC[C@H]1O[C@@H](C[C@H]([C@@H]1O)O)O	11	50489	CD207	other
3p5f	4n35	Yes	0.64378	3.4051	0.769231	OC[C@H]1OCC[C@H]([C@@H]1O)O	10	50489	CD207	other
4n35	3p5f	Yes	0.0859634	7.8773	0.769231	OC[C@H]1OCC[C@H]([C@@H]1O)O	10	50489	CD207	other
4n33	3p7h	Yes	0.43297	7.48567	0.540541	OC[C@H]1OCC[C@H]([C@@H]1O)O	10	50489	CD207	other
3p5e	4n35	Yes	0.646579	3.41378	0.769231	OC[C@H]1OCC[C@H]([C@@H]1O)O	10	50489	CD207	other
4n35	3p5e	Yes	1.80793	7.29912	0.769231	OC[C@H]1OCC[C@H]([C@@H]1O)O	10	50489	CD207	other
3p5d	3p5h	Yes	3.85482	8.0991	0.869565	OC[C@H]1OCC[C@H]([C@@H]1O)O	10	50489	CD207	other
3p5h	3p5d	Yes	4.416	8.53636	0.869565	OC[C@H]1OCC[C@H]([C@@H]1O)O	10	50489	CD207	other
3p5f	4n36	Yes	1.46711	7.42289	0.785714	OC[C@H]1O[C@@H](C[C@H]([C@@H]1O)O)O	11	50489	CD207	other
4n36	3p5f	Yes	1.58044		0.785714	OC[C@H]1O[C@@H](C[C@H]([C@@H]1O)O)O	11	50489	CD207	other
4n37	4n35	Yes	0.285475	5.21756	0.740741	OC[C@H]1OCC[C@H]([C@@H]1O)O	10	50489	CD207	other
4n35	4n37	Yes	0.0380704		0.740741	OC[C@H]1OCC[C@H]([C@@H]1O)O	10	50489	CD207	other
1e36	1e34		1.26031		0.636364	[O-]C(=O)[C@@H]([C@@H](C=O)CC)CNS(=O)=O	14	396766	CELA1	protease
1e34	1e36		0.798785		0.636364	[O-]C(=O)[C@@H]([C@@H](C=O)CC)CNS(=O)=O	14	396766	CELA1	protease
9est	8est		4.08148		0.8	CCOC(=O)Cc1c(C=O)cccc1	14	396766	CELA1	protease
1eas	1eat	Yes	5.80216		0.363636	O[C@@H]([C@@H](NC=O)C(C)C)C(F)F	12	396766	CELA1	protease
1eat	1eas		5.74878		0.363636	O[C@@H]([C@@H](NC=O)C(C)C)C(F)F	12	396766	CELA1	protease
1ele	1ela	Yes	0.393662	0.475678	0.327869	O=C(NCCC)C(F)(F)F	10	396766	CELA1	protease
1ela	1ele	Yes	0.530367	1.38163	0.327869	O=C(NCCC)C(F)(F)F	10	396766	CELA1	protease
1e38	1e34		1.28314		0.636364	[O-]C(=O)[C@@H]([C@@H](C=O)CC)CNS(=O)=O	14	396766	CELA1	protease
1e34	1e38		1.16618		0.636364	[O-]C(=O)[C@@H]([C@@H](C=O)CC)CNS(=O)=O	14	396766	CELA1	protease
1ele	1elb	Yes	4.71865	0.990325	0.419355	NC(=O)[C@@H](NC(=O)C(F)(F)F)CC	13	396766	CELA1	protease
1elb	1ele	Yes	5.06578	9.03681	0.419355	NC(=O)[C@@H](NC(=O)C(F)(F)F)CC	13	396766	CELA1	protease
1qgf	1e37		0.858425		0.636364	[O-]C(=O)[C@@H]([C@@H](C=O)CC)CNS(=O)=O	14	396766	CELA1	protease
1btu	1qgf		7.39011		0.487805	Cc1ccc(S(=O)=O)cc1	10	396766	CELA1	protease
1qgf	1btu		7.16855		0.487805	Cc1ccc(S(=O)=O)cc1	10	396766	CELA1	protease
9est	1jim		3.63418		0.588235	O=Cc1c(C)ccc(N)c1	10	396766	CELA1	protease
1jim	9est		1.95321		0.588235	O=Cc1c(C)ccc(N)c1	10	396766	CELA1	protease
1e35	1e38		1.3186		0.636364	[O-]C(=O)[C@@H]([C@@H](C=O)CC)CNS(=O)=O	14	396766	CELA1	protease
1e38	1e35		1.12956		0.636364	[O-]C(=O)[C@@H]([C@@H](C=O)CC)CNS(=O)=O	14	396766	CELA1	protease
1e35	1e36		1.29739		0.636364	[O-]C(=O)[C@@H]([C@@H](C=O)CC)CNS(=O)=O	14	396766	CELA1	protease
1e36	1e35		1.11937		0.636364	[O-]C(=O)[C@@H]([C@@H](C=O)CC)CNS(=O)=O	14	396766	CELA1	protease
1e37	1e34		1.28587		0.636364	[O-]C(=O)[C@@H]([C@@H](C=O)CC)CNS(=O)=O	14	396766	CELA1	protease
1e34	1e37		0.071615		0.636364	[O-]C(=O)[C@@H]([C@@H](C=O)CC)CNS(=O)=O	14	396766	CELA1	protease
1e35	1e37		1.19563		0.636364	[O-]C(=O)[C@@H]([C@@H](C=O)CC)CNS(=O)=O	14	396766	CELA1	protease
1e37	1e35		1.115		0.636364	[O-]C(=O)[C@@H]([C@@H](C=O)CC)CNS(=O)=O	14	396766	CELA1	protease
2est	7est		0.626778		0.688525	N[C@H](C(=O)N[C@H](C(=O)Nc1ccc(C(F)(F)F)cc1)C)C	21	396766	CELA1	protease
7est	2est	Yes	0.58905		0.688525	N[C@H](C(=O)N[C@H](C(=O)Nc1ccc(C(F)(F)F)cc1)C)C	21	396766	CELA1	protease
1qgf	1e36		0.615978		0.636364	[O-]C(=O)[C@@H]([C@@H](C=O)CC)CNS(=O)=O	14	396766	CELA1	protease
1qgf	1e38		1.47157		0.636364	[O-]C(=O)[C@@H]([C@@H](C=O)CC)CNS(=O)=O	14	396766	CELA1	protease
1btu	1e34		5.36952		0.487805	Cc1ccc(S(=O)=O)cc1	10	396766	CELA1	protease
1e34	1btu		6.88642		0.487805	Cc1ccc(S(=O)=O)cc1	10	396766	CELA1	protease
1eld	1elb		3.63117	0.876742	0.333333	C[C@H](NC(=O)C(F)(F)F)C=O	11	396766	CELA1	protease
1elb	1ela	Yes	4.93914	5.52389	0.338462	C[C@H](NC(=O)C(F)(F)F)C=O	11	396766	CELA1	protease
1ela	1elb	Yes	4.23934	2.92781	0.338462	C[C@H](NC(=O)C(F)(F)F)C=O	11	396766	CELA1	protease
1eld	1ela		2.11558	1.99742	0.338462	C[C@H](NC(=O)C(F)(F)F)C=O	11	396766	CELA1	protease
4ft9	4ftc	Yes	1.81667	8.89521	0.444444	O=C(Nc1[n]cc[n]c1)N	10	1111	CHEK1	kinase
4ftc	4ft9	Yes	0.0166603	9.17584	0.444444	O=C(Nc1[n]cc[n]c1)N	10	1111	CHEK1	kinase
4ft5	4ftc	Yes	1.06051	1.28287	0.416667	O=C(Nc1[n]cc[n]c1)N	10	1111	CHEK1	kinase
4ftc	4ft5	Yes	1.3713	9.14782	0.416667	O=C(Nc1[n]cc[n]c1)N	10	1111	CHEK1	kinase
4ftr	4fsy		1.98427	11.035	0.551724	O=C1Nc2c(Nc3c1cccc3)cccc2	16	1111	CHEK1	kinase
4fsy	4ftr	Yes	2.23752	3.96444	0.551724	O=C1Nc2c(Nc3c1cccc3)cccc2	16	1111	CHEK1	kinase
4fsn	4ft0	Yes	3.77634	1.89873	0.315789	O=C([O-])c1ccccc1	9	1111	CHEK1	kinase
4ft0	4fsn	Yes	2.859	3.18715	0.315789	O=C([O-])c1ccccc1	9	1111	CHEK1	kinase
2yex	2x8i	Yes	6.06823	0.754456	0.714286	O=c1[n]2c([n][nH]1)cc(C)c1c2cccc1	15	1111	CHEK1	kinase
2x8i	2yex	Yes	5.68556	1.43233	0.714286	O=c1[n]2c([n][nH]1)cc(C)c1c2cccc1	15	1111	CHEK1	kinase
4fsy	4ft0	Yes	2.00905	4.66309	0.846154	O=C1Nc2c(Nc3c1ccc(c3)c1ccccc1)cccc2	22	1111	CHEK1	kinase
4ft0	4fsy	Yes	1.82842	3.70985	0.846154	O=C1Nc2c(Nc3c1ccc(c3)c1ccccc1)cccc2	22	1111	CHEK1	kinase
2brh	2brb	Yes	0.555821	0.769219	0.823529	o1c2c(c(c1c1ccccc1)c1ccccc1)c[n]c[n]2	21	1111	CHEK1	kinase
2brb	2brh	Yes	0.849022	0.630488	0.823529	o1c2c(c(c1c1ccccc1)c1ccccc1)c[n]c[n]2	21	1111	CHEK1	kinase
2xf0	2xez	Yes	1.04572	1.09271	0.717949	[nH]1[n]cc(c2[n]cc3[n](c2)cc[n]3)c1	14	1111	CHEK1	kinase
2xez	2xf0	Yes	1.48711	1.4927	0.717949	[nH]1[n]cc(c2[n]cc3[n](c2)cc[n]3)c1	14	1111	CHEK1	kinase
2ym4	2ym3	Yes	2.43199	6.49581	0.538462	O=C(OCC)c1c[n]c2[nH][n]cc2c1	14	1111	CHEK1	kinase
2ym3	2ym4	Yes	2.20378	1.738	0.538462	O=C(OCC)c1c[n]c2[nH][n]cc2c1	14	1111	CHEK1	kinase
4ftt	4fsy	Yes	2.24094	9.61705	0.615385	O=C1Nc2c(Nc3c1cccc3)cccc2	16	1111	CHEK1	kinase
4fsy	4ftt	Yes	2.14352	4.48582	0.615385	O=C1Nc2c(Nc3c1cccc3)cccc2	16	1111	CHEK1	kinase
2e9o	2e9n	Yes	2.87289	1.36868	0.369231	[nH]1[n]cc2Cc3c(c12)cccc3	12	1111	CHEK1	kinase
2e9n	2e9o	Yes	2.16829	2.4103	0.369231	[nH]1[n]cc2Cc3c(c12)cccc3	12	1111	CHEK1	kinase
2hxq	2hxl	Yes	0.74661	1.42607	0.586207	CC1CC[NH+](Cc2cc3c([nH]cc3)cc2)CC1	17	1111	CHEK1	kinase
2hxl	2hxq	Yes	0.906494	3.20532	0.586207	CC1CC[NH+](Cc2cc3c([nH]cc3)cc2)CC1	17	1111	CHEK1	kinase
4fsy	4fsw	Yes	1.00974	3.99666	0.761905	O=C1Nc2c(Nc3c1cccc3)cccc2	16	1111	CHEK1	kinase
4fsw	4fsy	Yes	0.0127533	5.74148	0.761905	O=C1Nc2c(Nc3c1cccc3)cccc2	16	1111	CHEK1	kinase
4fti	4ftk		1.15872	2.87867	0.428571	N1=C2c3c(C=C2C=N1)cccc3	12	1111	CHEK1	kinase
4ftk	4fti	Yes	0.334497	0.503949	0.428571	N1=C2c3c(C=C2C=N1)cccc3	12	1111	CHEK1	kinase
4ft9	2ym8	Yes	2.25646		0.408163	[n]1cc2c(cc1)cccc2	10	1111	CHEK1	kinase
2ym8	4ft9		2.32247	1.50061	0.408163	[n]1cc2c(cc1)cccc2	10	1111	CHEK1	kinase
4ftu	4ft0	Yes	0.0296666	9.48433	0.581818	O=C1Nc2c(Nc3c1cccc3)cccc2	16	1111	CHEK1	kinase
4ft0	4ftu	Yes	0.00683943	3.49282	0.581818	O=C1Nc2c(Nc3c1cccc3)cccc2	16	1111	CHEK1	kinase
4fsq	4ftk	Yes	0.685367	0.686302	0.436364	c1ccc(c2ccccc2)cc1	12	1111	CHEK1	kinase
4ftk	4fsq	Yes	0.183072	0.590191	0.436364	c1ccc(c2ccccc2)cc1	12	1111	CHEK1	kinase
4fti	4fsn		1.97845	2.92259	0.4	N1=C2c3c(C=C2C=N1)cccc3	12	1111	CHEK1	kinase
4fsn	4fti	Yes	2.24807	1.56517	0.4	N1=C2c3c(C=C2C=N1)cccc3	12	1111	CHEK1	kinase
4ftt	4ftu	Yes	2.16344	9.40285	0.763636	COC(=O)Cc1ccc2Nc3c(C(=O)Nc2c1)cccc3	21	1111	CHEK1	kinase
4ftu	4ftt	Yes	2.45827	3.78914	0.763636	COC(=O)Cc1ccc2Nc3c(C(=O)Nc2c1)cccc3	21	1111	CHEK1	kinase
2wmx	2ym3	Yes	1.1116	1.50998	0.755556	[NH3+]C[C@@H]1OCCN(c2c3c[n][nH]c3[n]cc2)C1	17	1111	CHEK1	kinase
2ym3	2wmx	Yes	1.1885	1.48492	0.755556	[NH3+]C[C@@H]1OCCN(c2c3c[n][nH]c3[n]cc2)C1	17	1111	CHEK1	kinase
4ftt	4ft0	Yes	2.31454	10.2647	0.592593	O=C1Nc2c(Nc3c1cccc3)cccc2	16	1111	CHEK1	kinase
4ft0	4ftt	Yes	0.52526	3.14955	0.592593	O=C1Nc2c(Nc3c1cccc3)cccc2	16	1111	CHEK1	kinase
4ftk	2e9n	Yes	0.485859	0.339115	0.393443	c1ccc(c2ccccc2)cc1	12	1111	CHEK1	kinase
2cgx	2wmv	Yes	3.14258	5.05698	0.5625	[nH]1c[n]c2c1c[n]c[n]2	9	1111	CHEK1	kinase
2wmv	2cgx	Yes	4.10448	0.868465	0.5625	[nH]1c[n]c2c1c[n]c[n]2	9	1111	CHEK1	kinase
2wmw	2ym3	Yes	1.30131	2.93871	0.85	[NH3+]C[C@@H]1OCCN(c2c3c[n][nH]c3[n]cc2)C1	17	1111	CHEK1	kinase
2ym3	2wmw	Yes	1.17812	4.55262	0.85	[NH3+]C[C@@H]1OCCN(c2c3c[n][nH]c3[n]cc2)C1	17	1111	CHEK1	kinase
4ft0	4fsw	Yes	2.18747	3.25081	0.727273	O=C1Nc2c(Nc3c1cccc3)cccc2	16	1111	CHEK1	kinase
4fsw	4ft0	Yes	0.0208552	5.28571	0.727273	O=C1Nc2c(Nc3c1cccc3)cccc2	16	1111	CHEK1	kinase
2e9o	4ft0	Yes	2.84172	3.13807	0.315789	O=C([O-])c1ccccc1	9	1111	CHEK1	kinase
4ft0	2e9o	Yes	2.68439	3.04995	0.315789	O=C([O-])c1ccccc1	9	1111	CHEK1	kinase
2yex	2x8e	Yes	0.0157702	0.350876	0.731707	O=c1[n]2c([n][nH]1)cc(C)c1c2cccc1	15	1111	CHEK1	kinase
2x8e	2yex	Yes	0.0124288	0.543733	0.731707	O=c1[n]2c([n][nH]1)cc(C)c1c2cccc1	15	1111	CHEK1	kinase
4ftu	4fsw	Yes	1.22958	2.50212	0.711111	O=C1Nc2c(Nc3c1cccc3)cccc2	16	1111	CHEK1	kinase
4fsw	4ftu	Yes	0.0238476	3.13202	0.711111	O=C1Nc2c(Nc3c1cccc3)cccc2	16	1111	CHEK1	kinase
2wmx	2wmw	Yes	0.855698	4.75463	0.829268	[NH3+]C[C@@H]1OCCN(c2c3c[n][nH]c3[n]cc2)C1	17	1111	CHEK1	kinase
2wmw	2wmx	Yes	0.510563	0.530052	0.829268	[NH3+]C[C@@H]1OCCN(c2c3c[n][nH]c3[n]cc2)C1	17	1111	CHEK1	kinase
2bro	2brm	Yes	0.484272	1.53098	0.846154	Nc1c2c([nH]c(c2c2ccccc2)c2ccccc2)[n]c[n]1	22	1111	CHEK1	kinase
2brm	2bro	Yes	0.0102039	0.677045	0.846154	Nc1c2c([nH]c(c2c2ccccc2)c2ccccc2)[n]c[n]1	22	1111	CHEK1	kinase
4ft9	4ft5	Yes	1.39564		0.425532	O=C(Nc1[n]cc[n]c1)N	10	1111	CHEK1	kinase
4ft5	4ft9	Yes	1.50548	1.22672	0.425532	O=C(Nc1[n]cc[n]c1)N	10	1111	CHEK1	kinase
2e9v	2e9u	Yes	0.751028	1.38183	0.827586	Clc1cc2c(cc1)OCCCCCOc1[n]c(NC(=O)N2)c[n]c1	24	1111	CHEK1	kinase
4ftr	4ft0		1.14392	10.9995	0.8	O=C1Nc2c(Nc3c1ccc(c3)c1cc(OC)ccc1)cccc2	24	1111	CHEK1	kinase
4ft0	4ftr	Yes	0.00494413	3.61718	0.8	O=C1Nc2c(Nc3c1ccc(c3)c1cc(OC)ccc1)cccc2	24	1111	CHEK1	kinase
4fsy	4ftu	Yes	2.39112	4.17163	0.603774	O=C1Nc2c(Nc3c1cccc3)cccc2	16	1111	CHEK1	kinase
4ftu	4fsy	Yes	1.54083	8.64334	0.603774	O=C1Nc2c(Nc3c1cccc3)cccc2	16	1111	CHEK1	kinase
4ftm	4ftj	Yes	2.50382	3.87877	0.489796	[nH]1[n]c2c(Cc3c2cccc3)c1	12	1111	CHEK1	kinase
4ftj	4ftm	Yes	2.51161	3.18241	0.489796	[nH]1[n]c2c(Cc3c2cccc3)c1	12	1111	CHEK1	kinase
4ftr	4ftu		1.18331	10.8878	0.557377	O=C1Nc2c(Nc3c1cccc3)ccc(C)c2	17	1111	CHEK1	kinase
4ftu	4ftr	Yes	0.834081	9.50109	0.557377	O=C1Nc2c(Nc3c1cccc3)ccc(C)c2	17	1111	CHEK1	kinase
4fsu	4fto	Yes	0.895486	0.983817	0.666667	COc1cc2c3[nH][n]c(c4ccccc4)c3Cc2cc1	20	1111	CHEK1	kinase
4fto	4fsu	Yes	3.95296	8.45237	0.666667	COc1cc2c3[nH][n]c(c4ccccc4)c3Cc2cc1	20	1111	CHEK1	kinase
4ftr	4fsw		2.27404	10.6775	0.64	O=C1Nc2c(Nc3c1cccc3)cccc2	16	1111	CHEK1	kinase
4fsw	4ftr	Yes	0.0403383	2.82995	0.64	O=C1Nc2c(Nc3c1cccc3)cccc2	16	1111	CHEK1	kinase
4ftr	4ftt		1.34803	10.912	0.566667	O=C1Nc2c(Nc3c1cccc3)ccc(C)c2	17	1111	CHEK1	kinase
4ftt	4ftr	Yes	2.39282	8.97118	0.566667	O=C1Nc2c(Nc3c1cccc3)ccc(C)c2	17	1111	CHEK1	kinase
3ot3	3ot8	Yes	0.283704	0.516791	0.615385	Nc1[n]2c([n]cc1)c(c1c[n](C)[n]c1)c[n]2	16	1111	CHEK1	kinase
3ot8	3ot3	Yes	0.00581869	0.931677	0.615385	Nc1[n]2c([n]cc1)c(c1c[n](C)[n]c1)c[n]2	16	1111	CHEK1	kinase
2hxl	4hyi	Yes	6.76633	3.85947	0.310345	[nH]1[n]cc2c1cccc2	9	1111	CHEK1	kinase
4ftt	4fsw	Yes	1.76724	8.71821	0.727273	O=C1Nc2c(Nc3c1cccc3)cccc2	16	1111	CHEK1	kinase
4fsw	4ftt	Yes	0.0186674	2.48925	0.727273	O=C1Nc2c(Nc3c1cccc3)cccc2	16	1111	CHEK1	kinase
2x8e	2x8i	Yes	6.75892	6.63311	0.697674	O=c1[n]2c([n][nH]1)cc(C)c1c2cccc1	15	1111	CHEK1	kinase
2x8i	2x8e	Yes	5.57112	3.09525	0.697674	O=c1[n]2c([n][nH]1)cc(C)c1c2cccc1	15	1111	CHEK1	kinase
4fsq	2e9n	Yes	1.04922	0.989032	0.375	c1ccc(c2ccccc2)cc1	12	1111	CHEK1	kinase
4fsn	4ftk	Yes	1.24779	2.11371	0.428571	N1=C2c3c(C=C2C=N1)cccc3	12	1111	CHEK1	kinase
4ftk	4fsn	Yes	1.5345	0.22879	0.428571	N1=C2c3c(C=C2C=N1)cccc3	12	1111	CHEK1	kinase
2brh	2brg	Yes	0.0221837	0.668176	0.807692	o1c2c(c(c1c1ccccc1)c1ccccc1)c[n]c[n]2	21	1111	CHEK1	kinase
2brg	2brh	Yes	1.51688	1.49459	0.807692	o1c2c(c(c1c1ccccc1)c1ccccc1)c[n]c[n]2	21	1111	CHEK1	kinase
2ycs	2xk9		3.50126	0.821268	0.333333	[nH]1c2c(cc1)cccc2	9	11200	CHEK2	kinase
2yit	2w7x		1.36258	1.46253	0.315789	[nH]1c2c(cc1)cccc2	9	11200	CHEK2	kinase
2w7x	2yit		3.03707	2.28498	0.315789	[nH]1c2c(cc1)cccc2	9	11200	CHEK2	kinase
2ycr	2w0j		0.495404	1.91655	0.59375	O=C(Nc1ccccc1)Nc1ccc(C(=N)C)cc1	19	11200	CHEK2	kinase
2w0j	2ycq		1.80203	1.24584	0.3	N=C(c1ccccc1)C	9	11200	CHEK2	kinase
2ycq	2w0j		12.0821	2.17826	0.3	N=C(c1ccccc1)C	9	11200	CHEK2	kinase
2yit	2xk9		1.75256	1.91138	0.310345	[nH]1c2c(cc1)cccc2	9	11200	CHEK2	kinase
2yir	2xk9		0.648632	0.432128	0.440678	O=[NH+]c1c2[nH]c(cc2ccc1)C=O	13	11200	CHEK2	kinase
2xk9	2yir		2.76098	0.513574	0.440678	O=[NH+]c1c2[nH]c(cc2ccc1)C=O	13	11200	CHEK2	kinase
2ycq	2yir		0.170608	0.593728	0.433333	O=[NH+]c1c2[nH]c(cc2ccc1)C=O	13	11200	CHEK2	kinase
2yiq	2w7x		11.0618	1.38954	0.321429	[nH]1c2c(cc1)cccc2	9	11200	CHEK2	kinase
2yiq	2yit		11.4974	1.37325	0.315789	[nH]1c2c(cc1)cccc2	9	11200	CHEK2	kinase
2w0j	2xk9		1.59025	1.49626	0.305085	N=C(c1ccccc1)C	9	11200	CHEK2	kinase
2yit	2yir		1.39033	0.559661	0.305085	[nH]1c2c(cc1)cccc2	9	11200	CHEK2	kinase
2ycq	2xk9		0.32404	0.348616	0.813559	NN=C(C)c1ccc(NC(=O)c2[nH]c3c(c2)cccc3[NH+]=O)cc1	24	11200	CHEK2	kinase
2w7x	2ycq		0.00661708	0.324531	0.448276	O=[NH+]c1c2[nH]c(cc2ccc1)C=O	13	11200	CHEK2	kinase
2ycq	2w7x		0.205829	0.547997	0.448276	O=[NH+]c1c2[nH]c(cc2ccc1)C=O	13	11200	CHEK2	kinase
2yiq	2ycs		15.905	3.16283	0.339623	[nH]1c2c(cc1)cccc2	9	11200	CHEK2	kinase
2yit	2ycq		1.31148	0.36125	0.305085	[nH]1c2c(cc1)cccc2	9	11200	CHEK2	kinase
2ycq	2yit		2.24263	2.22299	0.305085	[nH]1c2c(cc1)cccc2	9	11200	CHEK2	kinase
2yiq	2yir		11.0994	1.38326	0.310345	[nH]1c2c(cc1)cccc2	9	11200	CHEK2	kinase
2w7x	2xk9		0.0115418	0.573868	0.45614	O=[NH+]c1c2[nH]c(cc2ccc1)C=O	13	11200	CHEK2	kinase
2ycr	2ycf		0.483669	2.29812	0.575758	O=C(Nc1ccccc1)Nc1ccc(C(=N)C)cc1	19	11200	CHEK2	kinase
2ycs	2w7x		3.51255	0.575857	0.339623	[nH]1c2c(cc1)cccc2	9	11200	CHEK2	kinase
2w7x	2ycs		3.69353	2.25033	0.339623	[nH]1c2c(cc1)cccc2	9	11200	CHEK2	kinase
2yiq	2xk9		10.8809	1.41893	0.315789	[nH]1c2c(cc1)cccc2	9	11200	CHEK2	kinase
2w0j	2ycf		0.287521	0.733015	0.612903	O=C(Nc1ccccc1)Nc1ccc(C(=N)C)cc1	19	11200	CHEK2	kinase
2yiq	2ycq		11.0329	1.35075	0.310345	[nH]1c2c(cc1)cccc2	9	11200	CHEK2	kinase
2w7x	2yir		0.0118999	1.54065	0.448276	O=[NH+]c1c2[nH]c(cc2ccc1)C=O	13	11200	CHEK2	kinase
2ycs	2ycq		5.46055	2.07049	0.327273	[nH]1c2c(cc1)cccc2	9	11200	CHEK2	kinase
2ycq	2ycs		3.57915	2.18582	0.327273	[nH]1c2c(cc1)cccc2	9	11200	CHEK2	kinase
2yit	2ycs		4.26971	0.667628	0.333333	[nH]1c2c(cc1)cccc2	9	11200	CHEK2	kinase
2ycs	2yir		4.56824	0.878518	0.327273	[nH]1c2c(cc1)cccc2	9	11200	CHEK2	kinase
1jhm	1l5f	Yes	2.47197	8.1743	0.947368	[nH]1c[n]c2c1cccc2	9	1253537	cobT	other enzyme
1d0v	1l5k	Yes	0.0494528	2.64033	0.956522	O=P(OC[C@H]1O[C@H]([n]2c[n]c3c2cccc3)[C@@H]([C@@H]1O)O)([O-])[O-]	22	1253537	cobT	other enzyme
1l5k	1d0v	Yes	0.0542867	0.404014	0.956522	O=P(OC[C@H]1O[C@H]([n]2c[n]c3c2cccc3)[C@@H]([C@@H]1O)O)([O-])[O-]	22	1253537	cobT	other enzyme
1jhp	1jhq	Yes	2.25826	6.75716	0.628571	COc1cc2[n]c[nH]c2cc1	11	1253537	cobT	other enzyme
1l4e	1jho	Yes	2.65973	2.3921	0.765957	Cc1cc2[n]c[n]([C@H]3O[C@H](C)[C@H]([C@H]3O)O)c2cc1	18	1253537	cobT	other enzyme
1jho	1l4e	Yes	2.8096	0.55547	0.765957	Cc1cc2[n]c[n]([C@H]3O[C@H](C)[C@H]([C@H]3O)O)c2cc1	18	1253537	cobT	other enzyme
4kqg	1jhq	Yes	1.01065	6.75083	0.514286	[nH]1c[n]c2c1cccc2	9	1253537	cobT	other enzyme
1d0s	1jho	Yes	0.0109959	5.53477	0.529412	[nH]1c[n]c2c1cccc2	9	1253537	cobT	other enzyme
1l5l	1l4e	Yes	0.0139365	5.89611	0.521739	O[C@H]1CO[C@H](COP(=O)([O-])[O-])C1	12	1253537	cobT	other enzyme
1l4e	1l5l	Yes	1.14114	1.96841	0.521739	O[C@H]1CO[C@H](COP(=O)([O-])[O-])C1	12	1253537	cobT	other enzyme
1jhp	1jhm	Yes	2.36119	3.90084	0.857143	[nH]1c[n]c2c1cccc2	9	1253537	cobT	other enzyme
1jhm	1jhp	Yes	0.0145671	5.97224	0.857143	[nH]1c[n]c2c1cccc2	9	1253537	cobT	other enzyme
1d0s	1jhp	Yes	0.0263594	6.96696	0.818182	[nH]1c[n]c2c1cccc2	9	1253537	cobT	other enzyme
1jhp	1d0s	Yes	0.057621	6.35081	0.818182	[nH]1c[n]c2c1cccc2	9	1253537	cobT	other enzyme
1jhq	1l4e	Yes	0.532571	0.779631	0.916667	O=P(OC[C@H]1O[C@H]([n]2c[n]c3c2cccc3)[C@@H]([C@@H]1O)O)([O-])[O-]	22	1253537	cobT	other enzyme
1l4e	1jhq	Yes	0.395369	0.46441	0.916667	O=P(OC[C@H]1O[C@H]([n]2c[n]c3c2cccc3)[C@@H]([C@@H]1O)O)([O-])[O-]	22	1253537	cobT	other enzyme
1jhp	1l5k	Yes	1.92577	9.30081	0.545455	[nH]1c[n]c2c1cccc2	9	1253537	cobT	other enzyme
1jhm	4kqg	Yes	2.4303	7.20482	0.857143	[nH]1c[n]c2c1cccc2	9	1253537	cobT	other enzyme
4kqg	1jhm	Yes	1.33213	8.44915	0.857143	[nH]1c[n]c2c1cccc2	9	1253537	cobT	other enzyme
1l5l	1l5k	Yes	1.01831	0.448825	0.545455	O[C@H]1CO[C@H](COP(=O)([O-])[O-])C1	12	1253537	cobT	other enzyme
1l5k	1l5l	Yes	0.177739	0.897484	0.545455	O[C@H]1CO[C@H](COP(=O)([O-])[O-])C1	12	1253537	cobT	other enzyme
1jhp	4kqg	Yes	2.49711	4.07579	0.818182	[nH]1c[n]c2c1cccc2	9	1253537	cobT	other enzyme
4kqg	1jhp	Yes	1.16872	6.89571	0.818182	[nH]1c[n]c2c1cccc2	9	1253537	cobT	other enzyme
4kqi	1l5k	Yes	1.30207	2.58067	0.956522	O=P(OC[C@H]1O[C@H]([n]2c[n]c3c2cccc3)[C@@H]([C@@H]1O)O)([O-])[O-]	22	1253537	cobT	other enzyme
1l5k	4kqi	Yes	0.0653637	0.674779	0.956522	O=P(OC[C@H]1O[C@H]([n]2c[n]c3c2cccc3)[C@@H]([C@@H]1O)O)([O-])[O-]	22	1253537	cobT	other enzyme
1l5k	1jhr	Yes	0.242015	0.465347	0.533333	O[C@H]1CO[C@H](COP(=O)([O-])[O-])C1	12	1253537	cobT	other enzyme
1jhr	1l5k	Yes	0.131709	0.568971	0.533333	O[C@H]1CO[C@H](COP(=O)([O-])[O-])C1	12	1253537	cobT	other enzyme
4kqg	1jho	Yes	0.977019	5.87615	0.529412	[nH]1c[n]c2c1cccc2	9	1253537	cobT	other enzyme
1jhm	1jho	Yes	0.0430836	5.51001	0.545455	[nH]1c[n]c2c1cccc2	9	1253537	cobT	other enzyme
1jha	1l4e	Yes	0.115694	1.98952	0.510638	O[C@H]1CO[C@H](COP(=O)([O-])[O-])C1	12	1253537	cobT	other enzyme
1l4e	1jha	Yes	0.244784	0.528227	0.510638	O[C@H]1CO[C@H](COP(=O)([O-])[O-])C1	12	1253537	cobT	other enzyme
1l4e	1l5k	Yes	1.33434	2.58944	0.956522	O=P(OC[C@H]1O[C@H]([n]2c[n]c3c2cccc3)[C@@H]([C@@H]1O)O)([O-])[O-]	22	1253537	cobT	other enzyme
1l5k	1l4e	Yes	0.00386123	5.31356	0.956522	O=P(OC[C@H]1O[C@H]([n]2c[n]c3c2cccc3)[C@@H]([C@@H]1O)O)([O-])[O-]	22	1253537	cobT	other enzyme
1d0s	1l5k	Yes	0.0321771	5.6069	0.545455	[nH]1c[n]c2c1cccc2	9	1253537	cobT	other enzyme
1d0s	1jhq	Yes	0.0245079	7.004	0.514286	[nH]1c[n]c2c1cccc2	9	1253537	cobT	other enzyme
1l5m	1l4e	Yes	0.00383349	0.633583	0.510638	O[C@H]1CO[C@H](COP(=O)([O-])[O-])C1	12	1253537	cobT	other enzyme
1l4e	1l5m	Yes	1.2472	1.51899	0.510638	O[C@H]1CO[C@H](COP(=O)([O-])[O-])C1	12	1253537	cobT	other enzyme
1jhm	1l5k	Yes	0.0434833	5.56796	0.5625	[nH]1c[n]c2c1cccc2	9	1253537	cobT	other enzyme
1l4e	1jhr	Yes	0.133958	1.9565	0.510638	O[C@H]1CO[C@H](COP(=O)([O-])[O-])C1	12	1253537	cobT	other enzyme
1jhr	1l4e	Yes	0.164412	6.09143	0.510638	O[C@H]1CO[C@H](COP(=O)([O-])[O-])C1	12	1253537	cobT	other enzyme
1d0s	1l5f	Yes	1.57265	8.38903	0.9	[nH]1c[n]c2c1cccc2	9	1253537	cobT	other enzyme
1l5m	1l5k	Yes	1.01473	0.440208	0.533333	O[C@H]1CO[C@H](COP(=O)([O-])[O-])C1	12	1253537	cobT	other enzyme
1l5k	1l5m	Yes	0.162288	0.950389	0.533333	O[C@H]1CO[C@H](COP(=O)([O-])[O-])C1	12	1253537	cobT	other enzyme
1jhm	1jhq	Yes	0.0287472	6.73126	0.529412	[nH]1c[n]c2c1cccc2	9	1253537	cobT	other enzyme
1jhp	1l5f	Yes	1.13032	7.15194	0.9	[nH]1c[n]c2c1cccc2	9	1253537	cobT	other enzyme
1jha	1l5k	Yes	0.144127	2.0275	0.533333	O[C@H]1CO[C@H](COP(=O)([O-])[O-])C1	12	1253537	cobT	other enzyme
1l5k	1jha	Yes	1.09281	0.588393	0.533333	O[C@H]1CO[C@H](COP(=O)([O-])[O-])C1	12	1253537	cobT	other enzyme
4kqg	1l5f	Yes	0.381438	7.51285	0.9	[nH]1c[n]c2c1cccc2	9	1253537	cobT	other enzyme
1jhp	1jho	Yes	2.39029	9.54525	0.529412	[nH]1c[n]c2c1cccc2	9	1253537	cobT	other enzyme
1d0s	1jhm	Yes	0.00785088	8.09923	0.857143	[nH]1c[n]c2c1cccc2	9	1253537	cobT	other enzyme
1jhm	1d0s	Yes	2.1377	8.50369	0.857143	[nH]1c[n]c2c1cccc2	9	1253537	cobT	other enzyme
4kqg	1l5k	Yes	1.0848	5.51737	0.545455	[nH]1c[n]c2c1cccc2	9	1253537	cobT	other enzyme
1jhq	1l5k	Yes	0.321099	0.60075	0.913043	O=P(OC[C@H]1O[C@H]([n]2c[n]c3c2cccc3)[C@@H]([C@@H]1O)O)[O-]	21	1253537	cobT	other enzyme
4pyn	4p7k	Yes	5.70088	0.505917	0.339623	[nH]1c[n]c2c1[n]c[n]c2	9	24267	Comt	other
4p7k	4pyn	Yes	5.61391	2.85031	0.339623	[nH]1c[n]c2c1[n]c[n]c2	9	24267	Comt	other
3u81	2zvj	Yes	7.73464	0.367666	0.339623	[nH]1c[n]c2c1[n]c[n]c2	9	24267	Comt	other
4pyo	2zvj	Yes	0.578894	0.376311	0.603774	O[C@@H]1CO[C@@H]([n]2c[n]c3c(N)[n]c[n]c23)C1	16	24267	Comt	other
4p7k	4pyo	Yes	7.78023	0.344091	0.339623	[nH]1c[n]c2c1[n]c[n]c2	9	24267	Comt	other
4pyo	4p7k	Yes	5.70155	1.45072	0.339623	[nH]1c[n]c2c1[n]c[n]c2	9	24267	Comt	other
4p7k	1h1d	Yes	7.67876	0.358338	0.333333	[nH]1c[n]c2c1[n]c[n]c2	9	24267	Comt	other
4p7k	2zvj	Yes	7.91601	0.349434	0.333333	[nH]1c[n]c2c1[n]c[n]c2	9	24267	Comt	other
3ozt	3ozs		0.712662	9.81038	0.375	Oc1cc([N+](=O)[O-])cc(C=O)c1	12	24267	Comt	other
3ozs	3ozt		0.751144	9.24955	0.375	Oc1cc([N+](=O)[O-])cc(C=O)c1	12	24267	Comt	other
3oe4	3oe5		0.879636	10.2156	0.375	Oc1cc([N+](=O)[O-])cc(C=O)c1	12	24267	Comt	other
3oe5	3oe4		0.916138	9.04305	0.375	Oc1cc([N+](=O)[O-])cc(C=O)c1	12	24267	Comt	other
3oe5	3ozs		3.56897	10.4092	0.375	Oc1cc([N+](=O)[O-])cc(C=O)c1	12	24267	Comt	other
3ozs	3oe5		0.846319	9.22796	0.375	Oc1cc([N+](=O)[O-])cc(C=O)c1	12	24267	Comt	other
3u81	1h1d	Yes	3.91045	0.331839	0.339623	[nH]1c[n]c2c1[n]c[n]c2	9	24267	Comt	other
3oe4	3ozs		4.56036	10.4154	0.363636	Oc1cc([N+](=O)[O-])cc(C=O)c1	12	24267	Comt	other
3ozs	3oe4		1.22552	8.76909	0.363636	Oc1cc([N+](=O)[O-])cc(C=O)c1	12	24267	Comt	other
1vid	3ozr		0.0286681	7.30404	0.578947	O=[N+]([O-])c1ccc(c(c1)O)O	11	24267	Comt	other
3ozr	1vid		6.54197	7.09003	0.578947	O=[N+]([O-])c1ccc(c(c1)O)O	11	24267	Comt	other
3ozt	3oe5		0.370023	9.25842	0.387097	Oc1cc([N+](=O)[O-])cc(C=O)c1	12	24267	Comt	other
3oe5	3ozt		0.844419	9.64921	0.387097	Oc1cc([N+](=O)[O-])cc(C=O)c1	12	24267	Comt	other
4p7k	2cl5	Yes	2.58911	0.362814	0.333333	[nH]1c[n]c2c1[n]c[n]c2	9	24267	Comt	other
4p7k	3u81	Yes	7.33805	0.486774	0.339623	[nH]1c[n]c2c1[n]c[n]c2	9	24267	Comt	other
3u81	4p7k	Yes	5.70224	0.506256	0.339623	[nH]1c[n]c2c1[n]c[n]c2	9	24267	Comt	other
4pyo	2cl5	Yes	3.75659	0.366326	0.603774	O[C@@H]1CO[C@@H]([n]2c[n]c3c(N)[n]c[n]c23)C1	16	24267	Comt	other
4pyn	2zvj	Yes	7.75545	0.367538	0.339623	[nH]1c[n]c2c1[n]c[n]c2	9	24267	Comt	other
3oe4	3ozt		0.842501	10.9809	0.375	Oc1cc([N+](=O)[O-])cc(C=O)c1	12	24267	Comt	other
3ozt	3oe4		0.980712	8.85702	0.375	Oc1cc([N+](=O)[O-])cc(C=O)c1	12	24267	Comt	other
3ozr	3s68		8.68403	8.68213	0.545455	Oc1cc([N+](=O)[O-])cc(C=O)c1	12	24267	Comt	other
3s68	3ozr		5.9994	9.36524	0.545455	Oc1cc([N+](=O)[O-])cc(C=O)c1	12	24267	Comt	other
3u81	2cl5	Yes	3.75596	0.365485	0.339623	[nH]1c[n]c2c1[n]c[n]c2	9	24267	Comt	other
3s68	4pyl		2.73792	7.97593	0.8	Oc1ccc(C(=O)c2ccc(C)cc2)cc1	16	24267	Comt	other
4pyn	1h1d	Yes	4.20254	0.332896	0.339623	[nH]1c[n]c2c1[n]c[n]c2	9	24267	Comt	other
4pyn	2cl5	Yes	3.75639	0.365617	0.339623	[nH]1c[n]c2c1[n]c[n]c2	9	24267	Comt	other
2rfh	3fx6	Yes	0.00447214		0.647059	O=C[C@H](Cc1ccccc1)C	11	286762	CPA1	protease
3fx6	2rfh		2.27242		0.647059	O=C[C@H](Cc1ccccc1)C	11	286762	CPA1	protease
3i1u	3fx6	Yes	0.764107	8.31666	0.666667	O=C([O-])CCc1ccccc1	11	286762	CPA1	protease
2rfh	8cpa	Yes	0.867212	11.2972	0.468085	O=C([O-])CCc1ccccc1	11	286762	CPA1	protease
3i1u	1cbx	Yes	0.292424		0.758621	O=C([O-])CCc1ccccc1	11	286762	CPA1	protease
1cbx	3i1u	Yes	1.0687		0.758621	O=C([O-])CCc1ccccc1	11	286762	CPA1	protease
1iy7	3fx6	Yes	0.993917	8.82585	0.628571	O=C([O-])CCc1ccccc1	11	286762	CPA1	protease
3fx6	1iy7		1.15504		0.628571	O=C([O-])CCc1ccccc1	11	286762	CPA1	protease
8cpa	1cbx		3.83891		0.468085	O=C([O-])CCc1ccccc1	11	286762	CPA1	protease
1cbx	8cpa	Yes	0.00618601	11.4242	0.468085	O=C([O-])CCc1ccccc1	11	286762	CPA1	protease
1bav	8cpa	Yes	0.235042	11.5646	0.5	O=C([O-])CCc1ccccc1	11	286762	CPA1	protease
8cpa	1bav		3.96143	8.41672	0.5	O=C([O-])CCc1ccccc1	11	286762	CPA1	protease
3fvl	3fx6	Yes	1.63515	8.10267	0.628571	O=C[C@H](Cc1ccccc1)C	11	286762	CPA1	protease
3fx6	3fvl		1.24392	9.57033	0.628571	O=C[C@H](Cc1ccccc1)C	11	286762	CPA1	protease
1bav	2rfh	Yes	0.70962		0.814815	O=C([O-])CCc1ccccc1	11	286762	CPA1	protease
2rfh	1bav	Yes	0.0866068	0.262698	0.814815	O=C([O-])CCc1ccccc1	11	286762	CPA1	protease
1cps	3fx6	Yes	1.08832	10.4904	0.628571	O=C[C@H](Cc1ccccc1)C	11	286762	CPA1	protease
3fx6	1cps		0.916425		0.628571	O=C[C@H](Cc1ccccc1)C	11	286762	CPA1	protease
1bav	1cbx	Yes	0.146382		0.814815	O=C([O-])CCc1ccccc1	11	286762	CPA1	protease
1cbx	1bav	Yes	1.89867	0.431899	0.814815	O=C([O-])CCc1ccccc1	11	286762	CPA1	protease
3i1u	1cps	Yes	0.00538516		0.733333	O=C([O-])CCc1ccccc1	11	286762	CPA1	protease
1cps	3i1u	Yes	1.02506		0.733333	O=C([O-])CCc1ccccc1	11	286762	CPA1	protease
2rfh	1cbx	Yes	0.0313868		0.733333	O=C[C@H](Cc1ccccc1)C	11	286762	CPA1	protease
1cbx	2rfh	Yes	2.17326		0.733333	O=C[C@H](Cc1ccccc1)C	11	286762	CPA1	protease
6cpa	1cbx		3.90376		0.458333	O=C([O-])CCc1ccccc1	11	286762	CPA1	protease
1cbx	6cpa	Yes	0.00546504	12.1428	0.458333	O=C([O-])CCc1ccccc1	11	286762	CPA1	protease
3i1u	3fvl	Yes	1.50062	7.37648	0.733333	O=C([O-])CCc1ccccc1	11	286762	CPA1	protease
3fvl	3i1u	Yes	1.2221		0.733333	O=C([O-])CCc1ccccc1	11	286762	CPA1	protease
3fvl	1cps	Yes	1.21878		0.6875	O=C[C@H](Cc1ccccc1)C	11	286762	CPA1	protease
1cps	3fvl	Yes	1.14294	7.48906	0.6875	O=C[C@H](Cc1ccccc1)C	11	286762	CPA1	protease
1cps	8cpa	Yes	0.273392	11.1887	0.458333	O=C([O-])CCc1ccccc1	11	286762	CPA1	protease
8cpa	1cps		4.15576		0.458333	O=C([O-])CCc1ccccc1	11	286762	CPA1	protease
1iy7	3fvl	Yes	1.3888	7.84294	0.6875	O=C([O-])CCc1ccccc1	11	286762	CPA1	protease
3fvl	1iy7	Yes	1.04213		0.6875	O=C([O-])CCc1ccccc1	11	286762	CPA1	protease
2rfh	3i1u	Yes	0.761241		0.758621	O=C([O-])CCc1ccccc1	11	286762	CPA1	protease
3i1u	2rfh	Yes	1.59136		0.758621	O=C([O-])CCc1ccccc1	11	286762	CPA1	protease
2rfh	3fvl	Yes	0.936705		0.709677	O=C[C@H](Cc1ccccc1)C	11	286762	CPA1	protease
3fvl	2rfh	Yes	2.41742		0.709677	O=C[C@H](Cc1ccccc1)C	11	286762	CPA1	protease
3fvl	1cbx	Yes	1.85796		0.903226	[O-]C(=O)[C@H](Cc1ccccc1)CC=O	14	286762	CPA1	protease
1cbx	3fvl	Yes	1.22162		0.903226	[O-]C(=O)[C@H](Cc1ccccc1)CC=O	14	286762	CPA1	protease
6cpa	3fx6		4.95152	8.00663	0.423077	O=C([O-])CCc1ccccc1	11	286762	CPA1	protease
3fx6	6cpa		1.43603	10.1593	0.423077	O=C([O-])CCc1ccccc1	11	286762	CPA1	protease
1bav	3fx6	Yes	1.56467	9.27886	0.709677	O=C([O-])CCc1ccccc1	11	286762	CPA1	protease
3fx6	1bav		1.72621	1.85893	0.709677	O=C([O-])CCc1ccccc1	11	286762	CPA1	protease
1iy7	6cpa	Yes	1.01888	10.0272	0.44898	O=C([O-])CCc1ccccc1	11	286762	CPA1	protease
6cpa	1iy7		4.06351		0.44898	O=C([O-])CCc1ccccc1	11	286762	CPA1	protease
1iy7	1cbx	Yes	0.895641		0.709677	O=C([O-])CCc1ccccc1	11	286762	CPA1	protease
1cbx	1iy7	Yes	0.007353		0.709677	O=C([O-])CCc1ccccc1	11	286762	CPA1	protease
6cpa	8cpa		0.746317	12.428	0.769231	OC(=O)N[C@@H](C)C(=O)NCP(=O)(O[C@@H](Cc1ccccc1)C(=O)[O-])[O-]	25	286762	CPA1	protease
8cpa	6cpa		0.419478	13.0118	0.769231	OC(=O)N[C@@H](C)C(=O)NCP(=O)(O[C@@H](Cc1ccccc1)C(=O)[O-])[O-]	25	286762	CPA1	protease
2rfh	1cps	Yes	0.763803		0.709677	O=C[C@H](Cc1ccccc1)C	11	286762	CPA1	protease
1cps	2rfh	Yes	2.29426		0.709677	O=C[C@H](Cc1ccccc1)C	11	286762	CPA1	protease
1bav	1iy7	Yes	0.0990122		0.785714	O=C([O-])CCc1ccccc1	11	286762	CPA1	protease
1iy7	1bav	Yes	0.99252	0.872691	0.785714	O=C([O-])CCc1ccccc1	11	286762	CPA1	protease
1iy7	2rfh	Yes	1.1291		0.709677	O=C([O-])CCc1ccccc1	11	286762	CPA1	protease
2rfh	1iy7	Yes	0.00685565		0.709677	O=C([O-])CCc1ccccc1	11	286762	CPA1	protease
3i1u	8cpa	Yes	1.03609	10.0628	0.478261	O=C([O-])CCc1ccccc1	11	286762	CPA1	protease
8cpa	3i1u		3.71386		0.478261	O=C([O-])CCc1ccccc1	11	286762	CPA1	protease
3fvl	8cpa	Yes	1.41339	11.2474	0.458333	O=C([O-])CCc1ccccc1	11	286762	CPA1	protease
8cpa	3fvl		4.92136	7.56759	0.458333	O=C([O-])CCc1ccccc1	11	286762	CPA1	protease
1bav	6cpa	Yes	0.470262	13.3023	0.488889	O=C([O-])CCc1ccccc1	11	286762	CPA1	protease
6cpa	1bav		2.9881		0.488889	O=C([O-])CCc1ccccc1	11	286762	CPA1	protease
1bav	3i1u	Yes	0.00676387		0.846154	O=C([O-])CCc1ccccc1	11	286762	CPA1	protease
3i1u	1bav	Yes	0.00691272	1.1235	0.846154	O=C([O-])CCc1ccccc1	11	286762	CPA1	protease
8cpa	1iy7		3.73434		0.458333	O=C([O-])CCc1ccccc1	11	286762	CPA1	protease
1cps	1cbx	Yes	0.955756		0.709677	O=C[C@H](Cc1ccccc1)C	11	286762	CPA1	protease
1cbx	1cps	Yes	0.89983		0.709677	O=C[C@H](Cc1ccccc1)C	11	286762	CPA1	protease
6cpa	3i1u		3.76577		0.468085	O=C([O-])CCc1ccccc1	11	286762	CPA1	protease
3i1u	6cpa	Yes	0.00767184	10.1342	0.468085	O=C([O-])CCc1ccccc1	11	286762	CPA1	protease
1bav	1cps	Yes	0.241247		0.785714	O=C([O-])CCc1ccccc1	11	286762	CPA1	protease
1cps	1bav	Yes	0.00878208	6.81613	0.785714	O=C([O-])CCc1ccccc1	11	286762	CPA1	protease
6cpa	3fvl		4.24231	7.43886	0.44898	O=C([O-])CCc1ccccc1	11	286762	CPA1	protease
3fvl	6cpa	Yes	1.39269	10.4204	0.44898	O=C([O-])CCc1ccccc1	11	286762	CPA1	protease
8cpa	3fx6		4.32272	9.06583	0.431373	O=C([O-])CCc1ccccc1	11	286762	CPA1	protease
3fx6	8cpa		1.09579	10.4169	0.431373	O=C([O-])CCc1ccccc1	11	286762	CPA1	protease
1iy7	3i1u	Yes	0.95551		0.733333	O=C([O-])CCc1ccccc1	11	286762	CPA1	protease
3i1u	1iy7	Yes	0.741326		0.733333	O=C([O-])CCc1ccccc1	11	286762	CPA1	protease
6cpa	1cps		4.90184		0.44898	O=C([O-])CCc1ccccc1	11	286762	CPA1	protease
1cps	6cpa	Yes	0.963744	10.1375	0.44898	O=C([O-])CCc1ccccc1	11	286762	CPA1	protease
1iy7	1cps	Yes	0.922789		0.6875	O=C([O-])CCc1ccccc1	11	286762	CPA1	protease
1cps	1iy7	Yes	1.41021		0.6875	O=C([O-])CCc1ccccc1	11	286762	CPA1	protease
1cbx	3fx6	Yes	1.14779		0.647059	O=C[C@H](Cc1ccccc1)C	11	286762	CPA1	protease
3fx6	1cbx		1.63223		0.647059	O=C[C@H](Cc1ccccc1)C	11	286762	CPA1	protease
6cpa	2rfh		3.71974		0.458333	O=C([O-])CCc1ccccc1	11	286762	CPA1	protease
2rfh	6cpa	Yes	0.128315	12.4431	0.458333	O=C([O-])CCc1ccccc1	11	286762	CPA1	protease
1bav	3fvl	Yes	1.26593		0.785714	O=C([O-])CCc1ccccc1	11	286762	CPA1	protease
3fvl	1bav	Yes	1.01972	1.06544	0.785714	O=C([O-])CCc1ccccc1	11	286762	CPA1	protease
3q9y	3bqc		0.728104	0.345465	0.9	Oc1cc2c(C(=O)c3c(cccc3C2=O)O)cc1	18	1457	CSNK2A1	kinase
3bqc	3q9y		0.842917	6.23428	0.9	Oc1cc2c(C(=O)c3c(cccc3C2=O)O)cc1	18	1457	CSNK2A1	kinase
3q9w	3q9z		0.00275681	1.53894	0.9	Oc1cc2c(C(=O)c3c(cccc3C2=O)O)cc1	18	1457	CSNK2A1	kinase
3q9z	3q9w		0.901818	0.579873	0.9	Oc1cc2c(C(=O)c3c(cccc3C2=O)O)cc1	18	1457	CSNK2A1	kinase
3q9y	3c13		1.1932	0.733749	0.9	Oc1cc2c(C(=O)c3c(cccc3C2=O)O)cc1	18	1457	CSNK2A1	kinase
3c13	3q9y		0.891939	6.22405	0.9	Oc1cc2c(C(=O)c3c(cccc3C2=O)O)cc1	18	1457	CSNK2A1	kinase
3bqc	3q9z		0.0196303	1.53347	0.9	Oc1cc2c(C(=O)c3c(cccc3C2=O)O)cc1	18	1457	CSNK2A1	kinase
3q9z	3bqc		1.07754	0.584968	0.9	Oc1cc2c(C(=O)c3c(cccc3C2=O)O)cc1	18	1457	CSNK2A1	kinase
3u4u	4gub	Yes	3.52757	7.81358	0.349206	N#Cc1c2[n]([n]c1)ccc[n]2	11	1457	CSNK2A1	kinase
4gub	3u4u	Yes	4.37789	1.05235	0.349206	N#Cc1c2[n]([n]c1)ccc[n]2	11	1457	CSNK2A1	kinase
3c13	3q9z		0.0057576	1.53544	0.9	Oc1cc2c(C(=O)c3c(cccc3C2=O)O)cc1	18	1457	CSNK2A1	kinase
3q9z	3c13		1.06643	0.579846	0.9	Oc1cc2c(C(=O)c3c(cccc3C2=O)O)cc1	18	1457	CSNK2A1	kinase
3q9w	3q9y		0.832249	6.22824	0.9	Oc1cc2c(C(=O)c3c(cccc3C2=O)O)cc1	18	1457	CSNK2A1	kinase
3q9y	3q9w		0.929086	0.676645	0.9	Oc1cc2c(C(=O)c3c(cccc3C2=O)O)cc1	18	1457	CSNK2A1	kinase
2dcb	2dcd	Yes	1.25912	1.39194	0.344828	CC[C@@H]([C@H](NC=O)C=O)C	10	281105	CTSB	protease
2dcd	2dcb	Yes	6.73599	1.13747	0.344828	CC[C@@H]([C@H](NC=O)C=O)C	10	281105	CTSB	protease
2dc7	2dcd	Yes	4.27947	1.17361	0.350877	CC[C@@H]([C@H](NC=O)C=O)C	10	281105	CTSB	protease
2dcd	2dc7	Yes	6.83758	1.84164	0.350877	CC[C@@H]([C@H](NC=O)C=O)C	10	281105	CTSB	protease
2dc7	2dcb	Yes	1.2039	1.10206	0.528302	[O-]C(=O)[C@@H](NC(=O)CCC)[C@H](CC)C	14	281105	CTSB	protease
2dcb	2dc7	Yes	1.41667	1.29364	0.528302	[O-]C(=O)[C@@H](NC(=O)CCC)[C@H](CC)C	14	281105	CTSB	protease
1qdq	2dc6	Yes	2.15915	2.28936	0.491803	O[C@H](C(=O)NCCC)CC(=O)NCCC	15	281105	CTSB	protease
2dc6	1qdq	Yes	4.45367	13.1516	0.491803	O[C@H](C(=O)NCCC)CC(=O)NCCC	15	281105	CTSB	protease
1qdq	2dca	Yes	0.987645	1.58791	0.392157	CC[C@@H]([C@H](NC=O)C=O)C	10	281105	CTSB	protease
2dca	1qdq		0.297355	1.12275	0.392157	CC[C@@H]([C@H](NC=O)C=O)C	10	281105	CTSB	protease
2dc8	2dc9	Yes	3.2756	1.392	0.425532	CC[C@@H]([C@H](NC=O)C=O)C	10	281105	CTSB	protease
2dc9	2dc8		1.59613	1.17716	0.425532	CC[C@@H]([C@H](NC=O)C=O)C	10	281105	CTSB	protease
2dcb	1qdq	Yes	0.982454	1.2582	0.37037	CC[C@@H]([C@H](NC=O)C=O)C	10	281105	CTSB	protease
1qdq	2dcb	Yes	5.46057	1.38672	0.37037	CC[C@@H]([C@H](NC=O)C=O)C	10	281105	CTSB	protease
1qdq	2dcd	Yes	1.55539	1.07639	0.37931	[O-]C(=O)[C@H]1N(C(=O)C)CCC1	11	281105	CTSB	protease
2dcd	1qdq	Yes	3.11671	1.44593	0.37931	[O-]C(=O)[C@H]1N(C(=O)C)CCC1	11	281105	CTSB	protease
2dc7	1qdq	Yes	5.29832	1.27066	0.377358	CC[C@@H]([C@H](NC=O)C=O)C	10	281105	CTSB	protease
1qdq	2dc7	Yes	5.43687	1.68272	0.377358	CC[C@@H]([C@H](NC=O)C=O)C	10	281105	CTSB	protease
2dc8	2dca	Yes	4.30307	1.60684	0.465116	CC[C@@H]([C@H](NC=O)C=O)C	10	281105	CTSB	protease
2dca	2dc8		1.62452	1.04133	0.465116	CC[C@@H]([C@H](NC=O)C=O)C	10	281105	CTSB	protease
2dc7	2dc9	Yes	5.60304	1.90089	0.37037	CC[C@@H]([C@H](NC=O)C=O)C	10	281105	CTSB	protease
2dc9	2dc7		4.37952	2.32444	0.37037	CC[C@@H]([C@H](NC=O)C=O)C	10	281105	CTSB	protease
2dc7	2dca	Yes	6.07394	1.51182	0.4	CC[C@@H]([C@H](NC=O)C=O)C	10	281105	CTSB	protease
2dca	2dc7		4.25449	1.30504	0.4	CC[C@@H]([C@H](NC=O)C=O)C	10	281105	CTSB	protease
2dc8	2dcb	Yes	0.762263	4.45157	0.782609	O[C@H](C(=O)OCC)CC(=O)N[C@H](C=O)[C@H](CC)C	18	281105	CTSB	protease
2dcb	2dc8	Yes	0.34876	1.51818	0.782609	O[C@H](C(=O)OCC)CC(=O)N[C@H](C=O)[C@H](CC)C	18	281105	CTSB	protease
2dc8	2dcd	Yes	0.691475	1.66091	0.4	CC[C@@H]([C@H](NC=O)C=O)C	10	281105	CTSB	protease
2dc9	1qdq		1.99032	1.55686	0.327273	O=C[C@H]1N(CCC1)C=O	9	281105	CTSB	protease
1qdq	2dc9	Yes	1.95349	1.09297	0.327273	O=C[C@H]1N(CCC1)C=O	9	281105	CTSB	protease
2dc8	1qdq	Yes	1.20073	1.72923	0.434783	CC[C@@H]([C@H](NC=O)C=O)C	10	281105	CTSB	protease
1qdq	2dc8	Yes	1.59977	4.39504	0.434783	CC[C@@H]([C@H](NC=O)C=O)C	10	281105	CTSB	protease
2dc9	2dcb		1.87472	2.3825	0.363636	CC[C@@H]([C@H](NC=O)C=O)C	10	281105	CTSB	protease
2dcb	2dc9	Yes	1.06315	1.45833	0.363636	CC[C@@H]([C@H](NC=O)C=O)C	10	281105	CTSB	protease
2dcb	2dca	Yes	3.62124	1.30793	0.588235	[O-]C(=O)CNC(=O)[C@@H](NC=O)[C@H](CC)C	15	281105	CTSB	protease
2dca	2dcb		0.865047	1.05804	0.588235	[O-]C(=O)CNC(=O)[C@@H](NC=O)[C@H](CC)C	15	281105	CTSB	protease
2dca	2dcd		1.04773	1.19163	0.363636	CC[C@@H]([C@H](NC=O)C=O)C	10	281105	CTSB	protease
2dc7	2dc8	Yes	5.64069	1.78398	0.444444	[O-]C(=O)[C@@H](NC=O)CCC	10	281105	CTSB	protease
2dc8	2dc7	Yes	5.52406	1.63008	0.444444	[O-]C(=O)[C@@H](NC=O)CCC	10	281105	CTSB	protease
1u9x	1u9w	Yes	3.84087	3.68441	0.644068	Oc1c(Nc2c3[n]c[nH]c3[n]c(C#N)[n]2)cccc1	19	1513	CTSK	protease
1u9w	1u9x	Yes	0.120181	7.82986	0.644068	Oc1c(Nc2c3[n]c[nH]c3[n]c(C#N)[n]2)cccc1	19	1513	CTSK	protease
2aux	2auz		0.678276	0.885297	0.4	OC(=O)NCCCCC	9	1513	CTSK	protease
2auz	2aux		0.736924	1.01133	0.4	OC(=O)NCCCCC	9	1513	CTSK	protease
3kwz	3kwb		2.70978	2.89411	0.357143	FC(c1ccccc1)(F)F	10	1513	CTSK	protease
3kwb	3o0u	Yes	3.29994	2.77069	0.363636	FC(c1ccccc1)(F)F	10	1513	CTSK	protease
1u9v	1u9w	Yes	2.26747	6.51275	0.423077	N#Cc1[n]c2[nH]c[n]c2c[n]1	11	1513	CTSK	protease
1u9w	1u9v	Yes	2.72968	7.78973	0.423077	N#Cc1[n]c2[nH]c[n]c2c[n]1	11	1513	CTSK	protease
4dmy	4dmx		0.400333	1.15673	0.474576	O=C[C@H]1[C@H](C(=O)NC2CC2)CCCC1	14	1513	CTSK	protease
4dmx	4dmy		1.58285	0.85197	0.474576	O=C[C@H]1[C@H](C(=O)NC2CC2)CCCC1	14	1513	CTSK	protease
3kwz	3o0u		9.78343	3.76011	0.377358	FC(c1ccccc1)(F)F	10	1513	CTSK	protease
1bgo	2aux	Yes	2.75114	5.43701	0.392857	CC(CCc1ccccc1)C	11	1513	CTSK	protease
2aux	1bgo		6.33814	1.29534	0.392857	CC(CCc1ccccc1)C	11	1513	CTSK	protease
1yk7	1snk		2.31152	6.97294	0.603774	O=C(OCc1ccccc1)NCCC(C)C	16	1513	CTSK	protease
1snk	1yk7	Yes	2.88637	6.16433	0.603774	O=C(OCc1ccccc1)NCCC(C)C	16	1513	CTSK	protease
3kx1	3kwz		2.13832	9.05011	0.627451	C=C1NC(=CC=N1)CCC[NH+]1CCCCC1	16	1513	CTSK	protease
3kwz	3kx1		2.68325	3.10178	0.627451	C=C1NC(=CC=N1)CCC[NH+]1CCCCC1	16	1513	CTSK	protease
2xu3	2yjc		0.599168	1.27689	0.666667	Clc1c(S(=O)(=O)[C@H]2CN[C@H](C(=O)NC3(C=N)CC3)C2)cccc1	23	1514	CTSL	protease
2yjc	2xu3		0.544698	0.600299	0.666667	Clc1c(S(=O)(=O)[C@H]2CN[C@H](C(=O)NC3(C=N)CC3)C2)cccc1	23	1514	CTSL	protease
2xu4	2yj2		0.843713	1.11288	0.657143	Clc1c(S(=O)(=O)[C@H]2CN[C@H](C(=O)NC3(C=N)CC3)C2)cccc1	23	1514	CTSL	protease
2yj2	2xu4		2.60524	0.534178	0.657143	Clc1c(S(=O)(=O)[C@H]2CN[C@H](C(=O)NC3(C=N)CC3)C2)cccc1	23	1514	CTSL	protease
2xu4	2xu5		0.748734	1.17342	0.657143	Clc1c(S(=O)(=O)[C@H]2CN[C@H](C(=O)NC3(C=N)CC3)C2)cccc1	23	1514	CTSL	protease
2xu5	2xu4		0.843107	0.970205	0.657143	Clc1c(S(=O)(=O)[C@H]2CN[C@H](C(=O)NC3(C=N)CC3)C2)cccc1	23	1514	CTSL	protease
2xu3	2yj8		0.73294	1.33286	0.666667	Clc1c(S(=O)(=O)[C@H]2CN[C@H](C(=O)NC3(C=N)CC3)C2)cccc1	23	1514	CTSL	protease
2yj8	2xu3		2.62426	0.666071	0.666667	Clc1c(S(=O)(=O)[C@H]2CN[C@H](C(=O)NC3(C=N)CC3)C2)cccc1	23	1514	CTSL	protease
2xu4	2xu1		1.14217	0.503888	0.657143	Clc1c(S(=O)(=O)[C@H]2CN[C@H](C(=O)NC3(C=N)CC3)C2)cccc1	23	1514	CTSL	protease
2xu1	2xu4		0.733098	0.505918	0.657143	Clc1c(S(=O)(=O)[C@H]2CN[C@H](C(=O)NC3(C=N)CC3)C2)cccc1	23	1514	CTSL	protease
2xu1	2yj8		0.644762	0.471689	0.657143	Clc1c(S(=O)(=O)[C@H]2CN[C@H](C(=O)NC3(C=N)CC3)C2)cccc1	23	1514	CTSL	protease
2yj8	2xu1		3.00392	0.548621	0.657143	Clc1c(S(=O)(=O)[C@H]2CN[C@H](C(=O)NC3(C=N)CC3)C2)cccc1	23	1514	CTSL	protease
2xu5	2xu3		0.659293	0.672823	0.666667	Clc1c(S(=O)(=O)[C@H]2CN[C@H](C(=O)NC3(C=N)CC3)C2)cccc1	23	1514	CTSL	protease
2xu3	2xu5		0.940453	0.920768	0.666667	Clc1c(S(=O)(=O)[C@H]2CN[C@H](C(=O)NC3(C=N)CC3)C2)cccc1	23	1514	CTSL	protease
2xu5	2yj2		0.656024	0.395117	0.657143	Clc1c(S(=O)(=O)[C@H]2CN[C@H](C(=O)NC3(C=N)CC3)C2)cccc1	23	1514	CTSL	protease
2yj2	2xu5		0.591283	0.57358	0.657143	Clc1c(S(=O)(=O)[C@H]2CN[C@H](C(=O)NC3(C=N)CC3)C2)cccc1	23	1514	CTSL	protease
2xu4	2xu3		0.703999	0.539208	0.666667	Clc1c(S(=O)(=O)[C@H]2CN[C@H](C(=O)NC3(C=N)CC3)C2)cccc1	23	1514	CTSL	protease
2xu3	2xu4		0.867469	0.880979	0.666667	Clc1c(S(=O)(=O)[C@H]2CN[C@H](C(=O)NC3(C=N)CC3)C2)cccc1	23	1514	CTSL	protease
2yjc	2yj2		0.609071	0.420825	0.657143	Clc1c(S(=O)(=O)[C@H]2CN[C@H](C(=O)NC3(C=N)CC3)C2)cccc1	23	1514	CTSL	protease
2yj2	2yjc		0.582967	0.420521	0.657143	Clc1c(S(=O)(=O)[C@H]2CN[C@H](C(=O)NC3(C=N)CC3)C2)cccc1	23	1514	CTSL	protease
2yjc	2yj8		0.720625	0.470084	0.657143	Clc1c(S(=O)(=O)[C@H]2CN[C@H](C(=O)NC3(C=N)CC3)C2)cccc1	23	1514	CTSL	protease
2yj8	2yjc		2.00624	0.511382	0.657143	Clc1c(S(=O)(=O)[C@H]2CN[C@H](C(=O)NC3(C=N)CC3)C2)cccc1	23	1514	CTSL	protease
2xu3	2xu1		0.737247	0.896738	0.666667	Clc1c(S(=O)(=O)[C@H]2CN[C@H](C(=O)NC3(C=N)CC3)C2)cccc1	23	1514	CTSL	protease
2xu1	2xu3		0.558324	0.624399	0.666667	Clc1c(S(=O)(=O)[C@H]2CN[C@H](C(=O)NC3(C=N)CC3)C2)cccc1	23	1514	CTSL	protease
2xu5	2yj8		0.680687	0.347847	0.657143	Clc1c(S(=O)(=O)[C@H]2CN[C@H](C(=O)NC3(C=N)CC3)C2)cccc1	23	1514	CTSL	protease
2yj8	2xu5		0.60738	0.676742	0.657143	Clc1c(S(=O)(=O)[C@H]2CN[C@H](C(=O)NC3(C=N)CC3)C2)cccc1	23	1514	CTSL	protease
2xu5	2xu1		0.71939	0.417496	0.657143	Clc1c(S(=O)(=O)[C@H]2CN[C@H](C(=O)NC3(C=N)CC3)C2)cccc1	23	1514	CTSL	protease
2xu1	2xu5		0.669265	0.549812	0.657143	Clc1c(S(=O)(=O)[C@H]2CN[C@H](C(=O)NC3(C=N)CC3)C2)cccc1	23	1514	CTSL	protease
2xu1	2yj2		0.665764	0.557338	0.657143	Clc1c(S(=O)(=O)[C@H]2CN[C@H](C(=O)NC3(C=N)CC3)C2)cccc1	23	1514	CTSL	protease
2yj2	2xu1		2.03119	0.584397	0.657143	Clc1c(S(=O)(=O)[C@H]2CN[C@H](C(=O)NC3(C=N)CC3)C2)cccc1	23	1514	CTSL	protease
2xu5	2yjc		0.588854	0.457634	0.657143	Clc1c(S(=O)(=O)[C@H]2CN[C@H](C(=O)NC3(C=N)CC3)C2)cccc1	23	1514	CTSL	protease
2yjc	2xu5		0.680856	0.548124	0.657143	Clc1c(S(=O)(=O)[C@H]2CN[C@H](C(=O)NC3(C=N)CC3)C2)cccc1	23	1514	CTSL	protease
2xu3	2yj2		1.08441	1.33253	0.666667	Clc1c(S(=O)(=O)[C@H]2CN[C@H](C(=O)NC3(C=N)CC3)C2)cccc1	23	1514	CTSL	protease
2yj2	2xu3		0.637908	0.640262	0.666667	Clc1c(S(=O)(=O)[C@H]2CN[C@H](C(=O)NC3(C=N)CC3)C2)cccc1	23	1514	CTSL	protease
2yj2	2yj8		0.662032	0.468389	0.657143	Clc1c(S(=O)(=O)[C@H]2CN[C@H](C(=O)NC3(C=N)CC3)C2)cccc1	23	1514	CTSL	protease
2yj8	2yj2		1.85662	0.40791	0.657143	Clc1c(S(=O)(=O)[C@H]2CN[C@H](C(=O)NC3(C=N)CC3)C2)cccc1	23	1514	CTSL	protease
2xu4	2yj8		0.739032	1.08265	0.657143	Clc1c(S(=O)(=O)[C@H]2CN[C@H](C(=O)NC3(C=N)CC3)C2)cccc1	23	1514	CTSL	protease
2yj8	2xu4		2.58011	0.9853	0.657143	Clc1c(S(=O)(=O)[C@H]2CN[C@H](C(=O)NC3(C=N)CC3)C2)cccc1	23	1514	CTSL	protease
2xu4	2yjc		0.607392	1.09372	0.657143	Clc1c(S(=O)(=O)[C@H]2CN[C@H](C(=O)NC3(C=N)CC3)C2)cccc1	23	1514	CTSL	protease
2yjc	2xu4		0.697741	0.425822	0.657143	Clc1c(S(=O)(=O)[C@H]2CN[C@H](C(=O)NC3(C=N)CC3)C2)cccc1	23	1514	CTSL	protease
3n3g	3n4c		2.03202	7.76745	0.472727	CCOc1c(C(F)(F)F)cccc1	13	1520	CTSS	protease
3n4c	3n3g		2.48696	10.5527	0.472727	CCOc1c(C(F)(F)F)cccc1	13	1520	CTSS	protease
3ovx	3n3g	Yes	4.29127	7.10567	0.487805	FC(c1ccccc1)(F)F	10	1520	CTSS	protease
2r9m	1nqc		1.09634	0.890566	0.459016	NC(=O)[C@@H](NC(=O)N1CCOCC1)C	14	1520	CTSS	protease
1nqc	2r9m		1.06897	6.79506	0.459016	NC(=O)[C@@H](NC(=O)N1CCOCC1)C	14	1520	CTSS	protease
2r9o	2r9n		0.618982	0.970127	0.38806	O=C[C@@H](NC=O)CC1CCCCC1	13	1520	CTSS	protease
2r9n	2r9o		2.15088	1.1167	0.38806	O=C[C@@H](NC=O)CC1CCCCC1	13	1520	CTSS	protease
2fra	2fq9		6.69667	1.29028	0.333333	FC(Cc1ccccc1)(F)F	11	1520	CTSS	protease
2fq9	2fra		0.97197	1.97655	0.333333	FC(Cc1ccccc1)(F)F	11	1520	CTSS	protease
2r9m	2r9o		0.0370763	2.54218	0.419355	O=C[C@@H](NC=O)CC1CCCCC1	13	1520	CTSS	protease
2r9o	2r9m		0.824056	1.44619	0.419355	O=C[C@@H](NC=O)CC1CCCCC1	13	1520	CTSS	protease
2ft2	2fq9		1.28387	1.28624	0.553846	O=C(N)[C@@H]([NH2+][C@H](C(F)(F)F)c1ccc(F)cc1)C	18	1520	CTSS	protease
2fq9	2ft2		2.25081		0.553846	O=C(N)[C@@H]([NH2+][C@H](C(F)(F)F)c1ccc(F)cc1)C	18	1520	CTSS	protease
2fud	2frq		2.9001		0.354839	O=CNC1CCS(=O)(=O)CC1	11	1520	CTSS	protease
2frq	2fud	Yes	4.08161	5.94196	0.354839	O=CNC1CCS(=O)(=O)CC1	11	1520	CTSS	protease
2fud	1ms6		2.19518	1.12968	0.491228	NC(=O)[C@@H](NC(=O)N1CCOCC1)C	14	1520	CTSS	protease
1ms6	2fud		0.63569	7.28854	0.491228	NC(=O)[C@@H](NC(=O)N1CCOCC1)C	14	1520	CTSS	protease
2r9o	2fud		3.50157	3.71624	0.459016	NC(=O)[C@@H](NC(=O)N1CCOCC1)C	14	1520	CTSS	protease
2fud	2r9o		1.93728	2.46659	0.459016	NC(=O)[C@@H](NC(=O)N1CCOCC1)C	14	1520	CTSS	protease
2r9m	2fud		2.31732	2.48677	0.491228	NC(=O)[C@@H](NC(=O)N1CCOCC1)C	14	1520	CTSS	protease
2fud	2r9m		0.00748809	7.74911	0.491228	NC(=O)[C@@H](NC(=O)N1CCOCC1)C	14	1520	CTSS	protease
2r9m	2r9n		0.0644868	2.51419	0.412698	O=C[C@@H](NC=O)CC1CCCCC1	13	1520	CTSS	protease
2r9n	2r9m		3.56602	5.40735	0.412698	O=C[C@@H](NC=O)CC1CCCCC1	13	1520	CTSS	protease
1ms6	1nqc		2.22464	2.63664	0.459016	NC(=O)[C@@H](NC(=O)N1CCOCC1)C	14	1520	CTSS	protease
1nqc	1ms6		2.71581	3.06335	0.459016	NC(=O)[C@@H](NC(=O)N1CCOCC1)C	14	1520	CTSS	protease
2r9o	1nqc		0.926078	2.39252	0.430769	NC(=O)[C@@H](NC(=O)N1CCOCC1)C	14	1520	CTSS	protease
1nqc	2r9o		3.25532	10.036	0.430769	NC(=O)[C@@H](NC(=O)N1CCOCC1)C	14	1520	CTSS	protease
2r9m	1ms6		2.17148	1.53874	0.482759	NC(=O)[C@@H](NC(=O)N1CCOCC1)C	14	1520	CTSS	protease
1ms6	2r9m		2.56017	9.27983	0.482759	NC(=O)[C@@H](NC(=O)N1CCOCC1)C	14	1520	CTSS	protease
2r9n	1nqc		3.00477	2.36656	0.424242	NC(=O)[C@@H](NC(=O)N1CCOCC1)C	14	1520	CTSS	protease
1nqc	2r9n		2.11599	1.77081	0.424242	NC(=O)[C@@H](NC(=O)N1CCOCC1)C	14	1520	CTSS	protease
2r9o	1ms6		0.763976	0.881705	0.806452	N#C[C@H](COCc1ccccc1)NC(=O)CNC(=O)N1CCOCC1	25	1520	CTSS	protease
1ms6	2r9o		0.606729	9.21316	0.806452	N#C[C@H](COCc1ccccc1)NC(=O)CNC(=O)N1CCOCC1	25	1520	CTSS	protease
2fud	2r9n		3.233	2.83533	0.451613	NC(=O)[C@@H](NC(=O)N1CCOCC1)C	14	1520	CTSS	protease
2r9n	2fud		2.56323	1.11728	0.451613	NC(=O)[C@@H](NC(=O)N1CCOCC1)C	14	1520	CTSS	protease
2fud	1nqc		0.450401	0.89665	0.466667	NC(=O)[C@@H](NC(=O)N1CCOCC1)C	14	1520	CTSS	protease
1nqc	2fud		2.92408	2.96622	0.466667	NC(=O)[C@@H](NC(=O)N1CCOCC1)C	14	1520	CTSS	protease
2fra	2ft2		1.18778		0.430769	O=C(NC1(C[NH3+])CC1)[C@H](CS(=O)=O)[NH3+]	14	1520	CTSS	protease
2ft2	2fra		0.23532	1.20441	0.430769	O=C(NC1(C[NH3+])CC1)[C@H](CS(=O)=O)[NH3+]	14	1520	CTSS	protease
1ms6	2r9n		0.63658	2.81849	0.444444	NC(=O)[C@@H](NC(=O)N1CCOCC1)C	14	1520	CTSS	protease
2r9n	1ms6		2.86368	0.780966	0.444444	NC(=O)[C@@H](NC(=O)N1CCOCC1)C	14	1520	CTSS	protease
3ovx	3n4c	Yes	5.16206	7.16749	0.384615	FC(c1ccccc1)(F)F	10	1520	CTSS	protease
1md2	3chb	Yes	7.19617		0.526316	OC[C@H]1OCC[C@H]([C@H]1O)O	10	2613962	ctxB	other
3chb	1md2	Yes	5.31122	5.26079	0.526316	OC[C@H]1OCC[C@H]([C@H]1O)O	10	2613962	ctxB	other
1rcv	1jr0	Yes	0.581967	2.88882	0.357143	O[C@H]1CO[C@H](O)[C@@H]([C@H]1O)O	10	2613962	ctxB	other
1jr0	1rcv		4.27912	6.17163	0.357143	O[C@H]1CO[C@H](O)[C@@H]([C@H]1O)O	10	2613962	ctxB	other
1g8z	1jr0	Yes	0.0627946	0.766574	0.454545	OC[C@H]1OCC[C@H]([C@H]1O)O	10	2613962	ctxB	other
1jr0	1g8z		2.46866	8.22527	0.454545	OC[C@H]1OCC[C@H]([C@H]1O)O	10	2613962	ctxB	other
2chb	1rcv	Yes	6.57507	6.6325	0.526316	OC[C@H]1OCC[C@H]([C@H]1O)O	10	2613962	ctxB	other
1rcv	2chb	Yes	5.53356	2.08017	0.526316	OC[C@H]1OCC[C@H]([C@H]1O)O	10	2613962	ctxB	other
1g8z	3chb	Yes	5.14989		0.769231	OC[C@H]1OCC[C@H]([C@H]1O)O	10	2613962	ctxB	other
3chb	1g8z	Yes	5.41319	5.5097	0.769231	OC[C@H]1OCC[C@H]([C@H]1O)O	10	2613962	ctxB	other
3chb	1jr0	Yes	5.63469	5.80534	0.434783	OC[C@H]1OCC[C@H]([C@H]1O)O	10	2613962	ctxB	other
1jr0	3chb		5.84347		0.434783	OC[C@H]1OCC[C@H]([C@H]1O)O	10	2613962	ctxB	other
3chb	1rcv	Yes	5.88152	5.9079	0.526316	OC[C@H]1OCC[C@H]([C@H]1O)O	10	2613962	ctxB	other
1rcv	3chb	Yes	5.95216		0.526316	OC[C@H]1OCC[C@H]([C@H]1O)O	10	2613962	ctxB	other
1g8z	1md2	Yes	0.91798	0.61158	0.555556	OC[C@H]1OCC[C@H]([C@H]1O)O	10	2613962	ctxB	other
1md2	1g8z	Yes	3.52384	8.03422	0.555556	OC[C@H]1OCC[C@H]([C@H]1O)O	10	2613962	ctxB	other
1g8z	1ct1	Yes	5.77037	2.87968	0.769231	OC[C@H]1OCC[C@H]([C@H]1O)O	10	2613962	ctxB	other
1ct1	1g8z	Yes	5.5428	5.80982	0.769231	OC[C@H]1OCC[C@H]([C@H]1O)O	10	2613962	ctxB	other
1g8z	1rcv	Yes	0.827012	0.509353	0.555556	OC[C@H]1OCC[C@H]([C@H]1O)O	10	2613962	ctxB	other
1rcv	1g8z	Yes	0.523476	6.99384	0.555556	OC[C@H]1OCC[C@H]([C@H]1O)O	10	2613962	ctxB	other
1md2	1jr0	Yes	4.14091	5.5716	0.357143	OC[C@H]1OCC[C@H]([C@H]1O)O	10	2613962	ctxB	other
1jr0	1md2		2.01308	6.05442	0.357143	OC[C@H]1OCC[C@H]([C@H]1O)O	10	2613962	ctxB	other
1md2	2chb	Yes	10.6726	6.54909	0.526316	OC[C@H]1OCC[C@H]([C@H]1O)O	10	2613962	ctxB	other
2chb	1md2	Yes	5.69125	5.65239	0.526316	OC[C@H]1OCC[C@H]([C@H]1O)O	10	2613962	ctxB	other
1md2	1rcv	Yes	3.81849	4.57201	0.416667	OC[C@H]1OCC[C@H]([C@H]1O)O	10	2613962	ctxB	other
1rcv	1md2	Yes	2.85755	2.75641	0.416667	OC[C@H]1OCC[C@H]([C@H]1O)O	10	2613962	ctxB	other
1g8z	2chb	Yes	5.93295	0.659695	0.769231	OC[C@H]1OCC[C@H]([C@H]1O)O	10	2613962	ctxB	other
2chb	1g8z	Yes	4.54567	4.73457	0.769231	OC[C@H]1OCC[C@H]([C@H]1O)O	10	2613962	ctxB	other
2chb	1jr0	Yes	5.38672	5.63795	0.434783	OC[C@H]1OCC[C@H]([C@H]1O)O	10	2613962	ctxB	other
1jr0	2chb		6.39227	6.18463	0.434783	OC[C@H]1OCC[C@H]([C@H]1O)O	10	2613962	ctxB	other
3f5g	3f5u		0.288665	11.0064	0.862069	O[C@H]1C[C@@H](O[C@@H]1COP(=O)(OP(=O)[O-])[O-])[n]1c[n]c2c(N)[n]c[n]c12	25	1612	DAPK1	kinase
3f5u	3f5g		0.548343	12.1524	0.862069	O[C@H]1C[C@@H](O[C@@H]1COP(=O)(OP(=O)[O-])[O-])[n]1c[n]c2c(N)[n]c[n]c12	25	1612	DAPK1	kinase
3gu4	3gu6		1.7025	2.688	0.862069	O[C@H]1C[C@@H](O[C@@H]1COP(=O)(OP(=O)[O-])[O-])[n]1c[n]c2c(N)[n]c[n]c12	25	1612	DAPK1	kinase
3gu6	3gu4		0.834017	0.833365	0.862069	O[C@H]1C[C@@H](O[C@@H]1COP(=O)(OP(=O)[O-])[O-])[n]1c[n]c2c(N)[n]c[n]c12	25	1612	DAPK1	kinase
3gu7	1jkl		0.89672	1.20603	0.862069	O[C@H]1C[C@@H](O[C@@H]1COP(=O)(OP(=O)[O-])[O-])[n]1c[n]c2c(N)[n]c[n]c12	25	1612	DAPK1	kinase
1jkl	3gu7		2.01296	10.9946	0.862069	O[C@H]1C[C@@H](O[C@@H]1COP(=O)(OP(=O)[O-])[O-])[n]1c[n]c2c(N)[n]c[n]c12	25	1612	DAPK1	kinase
3eh9	3gub		7.13936	6.71953	0.333333	[nH]1c[n]c2c1[n]c[n]c2	9	1612	DAPK1	kinase
1ig1	3f5g		1.77067	12.4477	0.862069	O[C@H]1C[C@@H](O[C@@H]1COP(=O)(OP(=O)[O-])[O-])[n]1c[n]c2c(N)[n]c[n]c12	25	1612	DAPK1	kinase
3f5g	1ig1		0.344523	10.4696	0.862069	O[C@H]1C[C@@H](O[C@@H]1COP(=O)(OP(=O)[O-])[O-])[n]1c[n]c2c(N)[n]c[n]c12	25	1612	DAPK1	kinase
3eh9	3dfc		0.00309121	0.992926	0.862069	O[C@H]1C[C@@H](O[C@@H]1COP(=O)(OP(=O)[O-])[O-])[n]1c[n]c2c(N)[n]c[n]c12	25	1612	DAPK1	kinase
3dfc	3eh9		1.89901	2.06792	0.862069	O[C@H]1C[C@@H](O[C@@H]1COP(=O)(OP(=O)[O-])[O-])[n]1c[n]c2c(N)[n]c[n]c12	25	1612	DAPK1	kinase
3gu4	3f5g		0.69205	12.1756	0.862069	O[C@H]1C[C@@H](O[C@@H]1COP(=O)(OP(=O)[O-])[O-])[n]1c[n]c2c(N)[n]c[n]c12	25	1612	DAPK1	kinase
3f5g	3gu4		0.634921	1.07231	0.862069	O[C@H]1C[C@@H](O[C@@H]1COP(=O)(OP(=O)[O-])[O-])[n]1c[n]c2c(N)[n]c[n]c12	25	1612	DAPK1	kinase
3gu4	3eh9		1.68328	2.10567	0.862069	O[C@H]1C[C@@H](O[C@@H]1COP(=O)(OP(=O)[O-])[O-])[n]1c[n]c2c(N)[n]c[n]c12	25	1612	DAPK1	kinase
3eh9	3gu4		0.653593	1.07773	0.862069	O[C@H]1C[C@@H](O[C@@H]1COP(=O)(OP(=O)[O-])[O-])[n]1c[n]c2c(N)[n]c[n]c12	25	1612	DAPK1	kinase
3gu7	3gub		7.14065	6.71855	0.333333	[nH]1c[n]c2c1[n]c[n]c2	9	1612	DAPK1	kinase
3gu4	2w4j		1.02215	10.2247	0.862069	O[C@H]1C[C@@H](O[C@@H]1COP(=O)(OP(=O)[O-])[O-])[n]1c[n]c2c(N)[n]c[n]c12	25	1612	DAPK1	kinase
2w4j	3gu4		0.878052	1.32293	0.862069	O[C@H]1C[C@@H](O[C@@H]1COP(=O)(OP(=O)[O-])[O-])[n]1c[n]c2c(N)[n]c[n]c12	25	1612	DAPK1	kinase
3gu6	1jkk		0.861338	8.37829	0.862069	O[C@H]1C[C@@H](O[C@@H]1COP(=O)(OP(=O)[O-])[O-])[n]1c[n]c2c(N)[n]c[n]c12	25	1612	DAPK1	kinase
1jkk	3gu6		1.71243	2.34984	0.862069	O[C@H]1C[C@@H](O[C@@H]1COP(=O)(OP(=O)[O-])[O-])[n]1c[n]c2c(N)[n]c[n]c12	25	1612	DAPK1	kinase
3gu7	3dfc		0.16615	0.989215	0.862069	O[C@H]1C[C@@H](O[C@@H]1COP(=O)(OP(=O)[O-])[O-])[n]1c[n]c2c(N)[n]c[n]c12	25	1612	DAPK1	kinase
3dfc	3gu7		0.617163	10.9847	0.862069	O[C@H]1C[C@@H](O[C@@H]1COP(=O)(OP(=O)[O-])[O-])[n]1c[n]c2c(N)[n]c[n]c12	25	1612	DAPK1	kinase
3gu7	1jkk		0.114468	8.36818	0.862069	O[C@H]1C[C@@H](O[C@@H]1COP(=O)(OP(=O)[O-])[O-])[n]1c[n]c2c(N)[n]c[n]c12	25	1612	DAPK1	kinase
1jkk	3gu7		1.49088	11.1845	0.862069	O[C@H]1C[C@@H](O[C@@H]1COP(=O)(OP(=O)[O-])[O-])[n]1c[n]c2c(N)[n]c[n]c12	25	1612	DAPK1	kinase
3eh9	1jkk		0.163429	8.40163	0.862069	O[C@H]1C[C@@H](O[C@@H]1COP(=O)(OP(=O)[O-])[O-])[n]1c[n]c2c(N)[n]c[n]c12	25	1612	DAPK1	kinase
1jkk	3eh9		1.31456	2.39831	0.862069	O[C@H]1C[C@@H](O[C@@H]1COP(=O)(OP(=O)[O-])[O-])[n]1c[n]c2c(N)[n]c[n]c12	25	1612	DAPK1	kinase
1ig1	2w4j		1.24599	10.5058	0.862069	O[C@H]1C[C@@H](O[C@@H]1COP(=O)(OP(=O)[O-])[O-])[n]1c[n]c2c(N)[n]c[n]c12	25	1612	DAPK1	kinase
2w4j	1ig1		0.195343	10.3803	0.862069	O[C@H]1C[C@@H](O[C@@H]1COP(=O)(OP(=O)[O-])[O-])[n]1c[n]c2c(N)[n]c[n]c12	25	1612	DAPK1	kinase
3gu7	1ig1		0.339615	10.4609	0.862069	O[C@H]1C[C@@H](O[C@@H]1COP(=O)(OP(=O)[O-])[O-])[n]1c[n]c2c(N)[n]c[n]c12	25	1612	DAPK1	kinase
1ig1	3gu7		1.51603	11.0998	0.862069	O[C@H]1C[C@@H](O[C@@H]1COP(=O)(OP(=O)[O-])[O-])[n]1c[n]c2c(N)[n]c[n]c12	25	1612	DAPK1	kinase
1ig1	3gu6		1.71297	2.34171	0.862069	O[C@H]1C[C@@H](O[C@@H]1COP(=O)(OP(=O)[O-])[O-])[n]1c[n]c2c(N)[n]c[n]c12	25	1612	DAPK1	kinase
3gu6	1ig1		0.983069	10.5941	0.862069	O[C@H]1C[C@@H](O[C@@H]1COP(=O)(OP(=O)[O-])[O-])[n]1c[n]c2c(N)[n]c[n]c12	25	1612	DAPK1	kinase
3eh9	1jkl		0.436676	0.898079	0.862069	O[C@H]1C[C@@H](O[C@@H]1COP(=O)(OP(=O)[O-])[O-])[n]1c[n]c2c(N)[n]c[n]c12	25	1612	DAPK1	kinase
1jkl	3eh9		1.78609	2.16249	0.862069	O[C@H]1C[C@@H](O[C@@H]1COP(=O)(OP(=O)[O-])[O-])[n]1c[n]c2c(N)[n]c[n]c12	25	1612	DAPK1	kinase
3gu8	3gub	Yes	0.761288	5.23965	0.352941	[nH]1c[n]c2c1[n]c[n]c2	9	1612	DAPK1	kinase
3gub	3gu8	Yes	0.719057	0.692522	0.352941	[nH]1c[n]c2c1[n]c[n]c2	9	1612	DAPK1	kinase
2w4j	1jkl		0.908872	1.20654	0.862069	O[C@H]1C[C@@H](O[C@@H]1COP(=O)(OP(=O)[O-])[O-])[n]1c[n]c2c(N)[n]c[n]c12	25	1612	DAPK1	kinase
1jkl	2w4j		1.20128	10.5093	0.862069	O[C@H]1C[C@@H](O[C@@H]1COP(=O)(OP(=O)[O-])[O-])[n]1c[n]c2c(N)[n]c[n]c12	25	1612	DAPK1	kinase
3eha	2w4j		1.12249	10.3165	0.862069	O[C@H]1C[C@@H](O[C@@H]1COP(=O)(OP(=O)[O-])[O-])[n]1c[n]c2c(N)[n]c[n]c12	25	1612	DAPK1	kinase
2w4j	3eha		0.267154	0.43517	0.862069	O[C@H]1C[C@@H](O[C@@H]1COP(=O)(OP(=O)[O-])[O-])[n]1c[n]c2c(N)[n]c[n]c12	25	1612	DAPK1	kinase
3eh9	3f5u		0.273175	11.0125	0.862069	O[C@H]1C[C@@H](O[C@@H]1COP(=O)(OP(=O)[O-])[O-])[n]1c[n]c2c(N)[n]c[n]c12	25	1612	DAPK1	kinase
3f5u	3eh9		1.97654	2.06799	0.862069	O[C@H]1C[C@@H](O[C@@H]1COP(=O)(OP(=O)[O-])[O-])[n]1c[n]c2c(N)[n]c[n]c12	25	1612	DAPK1	kinase
3f5g	3gub		7.06255	6.78993	0.333333	[nH]1c[n]c2c1[n]c[n]c2	9	1612	DAPK1	kinase
3f5g	1jkl		0.896007	1.20589	0.862069	O[C@H]1C[C@@H](O[C@@H]1COP(=O)(OP(=O)[O-])[O-])[n]1c[n]c2c(N)[n]c[n]c12	25	1612	DAPK1	kinase
1jkl	3f5g		1.97138	12.505	0.862069	O[C@H]1C[C@@H](O[C@@H]1COP(=O)(OP(=O)[O-])[O-])[n]1c[n]c2c(N)[n]c[n]c12	25	1612	DAPK1	kinase
3eh9	1ig1		0.505887	10.5271	0.862069	O[C@H]1C[C@@H](O[C@@H]1COP(=O)(OP(=O)[O-])[O-])[n]1c[n]c2c(N)[n]c[n]c12	25	1612	DAPK1	kinase
1ig1	3eh9		1.55428	2.51384	0.862069	O[C@H]1C[C@@H](O[C@@H]1COP(=O)(OP(=O)[O-])[O-])[n]1c[n]c2c(N)[n]c[n]c12	25	1612	DAPK1	kinase
3gu6	1jkl		0.825251	0.581246	0.862069	O[C@H]1C[C@@H](O[C@@H]1COP(=O)(OP(=O)[O-])[O-])[n]1c[n]c2c(N)[n]c[n]c12	25	1612	DAPK1	kinase
1jkl	3gu6		1.75276	2.4071	0.862069	O[C@H]1C[C@@H](O[C@@H]1COP(=O)(OP(=O)[O-])[O-])[n]1c[n]c2c(N)[n]c[n]c12	25	1612	DAPK1	kinase
3gu6	3f5u		0.87866	10.8452	0.862069	O[C@H]1C[C@@H](O[C@@H]1COP(=O)(OP(=O)[O-])[O-])[n]1c[n]c2c(N)[n]c[n]c12	25	1612	DAPK1	kinase
3f5u	3gu6		1.87214	2.74719	0.862069	O[C@H]1C[C@@H](O[C@@H]1COP(=O)(OP(=O)[O-])[O-])[n]1c[n]c2c(N)[n]c[n]c12	25	1612	DAPK1	kinase
2w4j	3f5u		0.00765942	10.9283	0.862069	O[C@H]1C[C@@H](O[C@@H]1COP(=O)(OP(=O)[O-])[O-])[n]1c[n]c2c(N)[n]c[n]c12	25	1612	DAPK1	kinase
3f5u	2w4j		1.24662	10.2093	0.862069	O[C@H]1C[C@@H](O[C@@H]1COP(=O)(OP(=O)[O-])[O-])[n]1c[n]c2c(N)[n]c[n]c12	25	1612	DAPK1	kinase
2w4j	3gu5		0.00770281	14.0144	0.862069	O[C@H]1C[C@@H](O[C@@H]1COP(=O)(OP(=O)[O-])[O-])[n]1c[n]c2c(N)[n]c[n]c12	25	1612	DAPK1	kinase
3gu5	2w4j		1.36181	10.2692	0.862069	O[C@H]1C[C@@H](O[C@@H]1COP(=O)(OP(=O)[O-])[O-])[n]1c[n]c2c(N)[n]c[n]c12	25	1612	DAPK1	kinase
3gu6	3dfc		0.790243	0.594905	0.862069	O[C@H]1C[C@@H](O[C@@H]1COP(=O)(OP(=O)[O-])[O-])[n]1c[n]c2c(N)[n]c[n]c12	25	1612	DAPK1	kinase
3dfc	3gu6		1.52836	2.4188	0.862069	O[C@H]1C[C@@H](O[C@@H]1COP(=O)(OP(=O)[O-])[O-])[n]1c[n]c2c(N)[n]c[n]c12	25	1612	DAPK1	kinase
3gu4	3gu7		0.842737	11.1537	0.862069	O[C@H]1C[C@@H](O[C@@H]1COP(=O)(OP(=O)[O-])[O-])[n]1c[n]c2c(N)[n]c[n]c12	25	1612	DAPK1	kinase
3gu7	3gu4		0.109776	1.185	0.862069	O[C@H]1C[C@@H](O[C@@H]1COP(=O)(OP(=O)[O-])[O-])[n]1c[n]c2c(N)[n]c[n]c12	25	1612	DAPK1	kinase
3eha	3gu6		1.9714	2.83895	0.862069	O[C@H]1C[C@@H](O[C@@H]1COP(=O)(OP(=O)[O-])[O-])[n]1c[n]c2c(N)[n]c[n]c12	25	1612	DAPK1	kinase
3gu6	3eha		0.786282	0.95079	0.862069	O[C@H]1C[C@@H](O[C@@H]1COP(=O)(OP(=O)[O-])[O-])[n]1c[n]c2c(N)[n]c[n]c12	25	1612	DAPK1	kinase
3gu7	3eha		0.130698	0.502044	0.862069	O[C@H]1C[C@@H](O[C@@H]1COP(=O)(OP(=O)[O-])[O-])[n]1c[n]c2c(N)[n]c[n]c12	25	1612	DAPK1	kinase
3eha	3gu7		0.618643	10.9853	0.862069	O[C@H]1C[C@@H](O[C@@H]1COP(=O)(OP(=O)[O-])[O-])[n]1c[n]c2c(N)[n]c[n]c12	25	1612	DAPK1	kinase
1jkk	3f5g		1.81546	12.519	0.862069	O[C@H]1C[C@@H](O[C@@H]1COP(=O)(OP(=O)[O-])[O-])[n]1c[n]c2c(N)[n]c[n]c12	25	1612	DAPK1	kinase
3f5g	1jkk		0.111857	8.36843	0.862069	O[C@H]1C[C@@H](O[C@@H]1COP(=O)(OP(=O)[O-])[O-])[n]1c[n]c2c(N)[n]c[n]c12	25	1612	DAPK1	kinase
2w4j	3gu8		7.90919	6.7586	0.352941	[nH]1c[n]c2c1[n]c[n]c2	9	1612	DAPK1	kinase
3gu5	3f5g		0.568958	12.2039	0.862069	O[C@H]1C[C@@H](O[C@@H]1COP(=O)(OP(=O)[O-])[O-])[n]1c[n]c2c(N)[n]c[n]c12	25	1612	DAPK1	kinase
3f5g	3gu5		0.159198	13.9506	0.862069	O[C@H]1C[C@@H](O[C@@H]1COP(=O)(OP(=O)[O-])[O-])[n]1c[n]c2c(N)[n]c[n]c12	25	1612	DAPK1	kinase
2w4j	1jkk		0.359723	8.36844	0.862069	O[C@H]1C[C@@H](O[C@@H]1COP(=O)(OP(=O)[O-])[O-])[n]1c[n]c2c(N)[n]c[n]c12	25	1612	DAPK1	kinase
1jkk	2w4j		1.20293	10.5193	0.862069	O[C@H]1C[C@@H](O[C@@H]1COP(=O)(OP(=O)[O-])[O-])[n]1c[n]c2c(N)[n]c[n]c12	25	1612	DAPK1	kinase
3gu6	3gu5		0.797258	13.9856	0.862069	O[C@H]1C[C@@H](O[C@@H]1COP(=O)(OP(=O)[O-])[O-])[n]1c[n]c2c(N)[n]c[n]c12	25	1612	DAPK1	kinase
3gu5	3gu6		1.87529	2.8628	0.862069	O[C@H]1C[C@@H](O[C@@H]1COP(=O)(OP(=O)[O-])[O-])[n]1c[n]c2c(N)[n]c[n]c12	25	1612	DAPK1	kinase
3eh9	3gu5		0.429474	13.8204	0.862069	O[C@H]1C[C@@H](O[C@@H]1COP(=O)(OP(=O)[O-])[O-])[n]1c[n]c2c(N)[n]c[n]c12	25	1612	DAPK1	kinase
3gu5	3eh9		2.22023	2.11193	0.862069	O[C@H]1C[C@@H](O[C@@H]1COP(=O)(OP(=O)[O-])[O-])[n]1c[n]c2c(N)[n]c[n]c12	25	1612	DAPK1	kinase
2w4j	3dfc		0.251694	0.993545	0.862069	O[C@H]1C[C@@H](O[C@@H]1COP(=O)(OP(=O)[O-])[O-])[n]1c[n]c2c(N)[n]c[n]c12	25	1612	DAPK1	kinase
3dfc	2w4j		1.12194	10.3154	0.862069	O[C@H]1C[C@@H](O[C@@H]1COP(=O)(OP(=O)[O-])[O-])[n]1c[n]c2c(N)[n]c[n]c12	25	1612	DAPK1	kinase
3gu6	3gub		7.1519	6.69346	0.333333	[nH]1c[n]c2c1[n]c[n]c2	9	1612	DAPK1	kinase
3gub	3gu6	Yes	1.97576	5.1707	0.333333	[nH]1c[n]c2c1[n]c[n]c2	9	1612	DAPK1	kinase
3gu7	3gu5		0.194152	13.9352	0.862069	O[C@H]1C[C@@H](O[C@@H]1COP(=O)(OP(=O)[O-])[O-])[n]1c[n]c2c(N)[n]c[n]c12	25	1612	DAPK1	kinase
3gu5	3gu7		0.0585869	10.8198	0.862069	O[C@H]1C[C@@H](O[C@@H]1COP(=O)(OP(=O)[O-])[O-])[n]1c[n]c2c(N)[n]c[n]c12	25	1612	DAPK1	kinase
3eh9	3eha		0.335851	0.512668	0.862069	O[C@H]1C[C@@H](O[C@@H]1COP(=O)(OP(=O)[O-])[O-])[n]1c[n]c2c(N)[n]c[n]c12	25	1612	DAPK1	kinase
3eha	3eh9		1.94951	2.09246	0.862069	O[C@H]1C[C@@H](O[C@@H]1COP(=O)(OP(=O)[O-])[O-])[n]1c[n]c2c(N)[n]c[n]c12	25	1612	DAPK1	kinase
3gu7	3f5u		0.0400199	10.9277	0.862069	O[C@H]1C[C@@H](O[C@@H]1COP(=O)(OP(=O)[O-])[O-])[n]1c[n]c2c(N)[n]c[n]c12	25	1612	DAPK1	kinase
3f5u	3gu7		0.618942	10.9882	0.862069	O[C@H]1C[C@@H](O[C@@H]1COP(=O)(OP(=O)[O-])[O-])[n]1c[n]c2c(N)[n]c[n]c12	25	1612	DAPK1	kinase
3eha	3f5g		0.549625	12.153	0.862069	O[C@H]1C[C@@H](O[C@@H]1COP(=O)(OP(=O)[O-])[O-])[n]1c[n]c2c(N)[n]c[n]c12	25	1612	DAPK1	kinase
3f5g	3eha		0.0417315	0.533677	0.862069	O[C@H]1C[C@@H](O[C@@H]1COP(=O)(OP(=O)[O-])[O-])[n]1c[n]c2c(N)[n]c[n]c12	25	1612	DAPK1	kinase
3dfc	3f5g		0.548738	12.1533	0.862069	O[C@H]1C[C@@H](O[C@@H]1COP(=O)(OP(=O)[O-])[O-])[n]1c[n]c2c(N)[n]c[n]c12	25	1612	DAPK1	kinase
3f5g	3dfc		0.0612735	0.988364	0.862069	O[C@H]1C[C@@H](O[C@@H]1COP(=O)(OP(=O)[O-])[O-])[n]1c[n]c2c(N)[n]c[n]c12	25	1612	DAPK1	kinase
2zi3	2zi4	Yes	0.642662	1.46266	0.5	[nH]1c[n]c2c1[n]c[n]c2	9	1633	DCK	other
2zi4	2zi3	Yes	0.982398	0.408615	0.5	[nH]1c[n]c2c1[n]c[n]c2	9	1633	DCK	other
2zi6	2zi4	Yes	2.21752	2.53063	0.5	[nH]1c[n]c2c1[n]c[n]c2	9	1633	DCK	other
2zi4	2zi6	Yes	2.56069	2.3015	0.5	[nH]1c[n]c2c1[n]c[n]c2	9	1633	DCK	other
4jlk	4jlj	Yes	0.3754	3.40772	0.363636	FCCOc1ccccc1	10	1633	DCK	other
4jlj	4jlk	Yes	1.08409	1.27456	0.363636	FCCOc1ccccc1	10	1633	DCK	other
4jln	4jlk	Yes	1.00375	2.09318	0.965517	FCCOc1c(OC)ccc(c2sc(c([n]2)CSc2[n]c(cc([n]2)N)N)C)c1	28	1633	DCK	other
4jlk	4jln	Yes	1.12375	0.488831	0.965517	FCCOc1c(OC)ccc(c2sc(c([n]2)CSc2[n]c(cc([n]2)N)N)C)c1	28	1633	DCK	other
4jlk	4jlm	Yes	0.569312	0.987648	0.350877	FCCOc1ccccc1	10	1633	DCK	other
4jlm	4jlk	Yes	0.849606	1.63832	0.350877	FCCOc1ccccc1	10	1633	DCK	other
2no0	1p60	Yes	0.00348807	0.331046	0.941176	O=c1[n]([C@@H]2O[C@H](CO)[C@H](C2)O)ccc([n]1)N	16	1633	DCK	other
4jln	4jlm	Yes	1.32676	2.56101	0.338983	FCCOc1ccccc1	10	1633	DCK	other
4jlm	4jln	Yes	0.858344	0.613746	0.338983	FCCOc1ccccc1	10	1633	DCK	other
1p5z	1p60	Yes	0.300679	0.39943	0.484848	O=c1[nH]ccc([n]1)N	8	1633	DCK	other
2no6	2noa	Yes	0.24973	0.513721	0.967742	OC[C@H]1SC[C@H](O1)[n]1c(=O)[n]c(N)cc1	15	1633	DCK	other
4jlj	4jlm	Yes	0.440609	0.885791	0.357143	FCCOc1ccccc1	10	1633	DCK	other
4jlm	4jlj	Yes	0.59036	2.72565	0.357143	FCCOc1ccccc1	10	1633	DCK	other
2zia	2zi4	Yes	0.549298	4.0053	0.540541	Nc1[n]c[n]c2[nH]c[n]c12	10	1633	DCK	other
2zi4	2zia	Yes	0.714952	0.342933	0.540541	Nc1[n]c[n]c2[nH]c[n]c12	10	1633	DCK	other
2no0	2no1	Yes	0.00250555	0.367079	0.470588	O=c1[nH]ccc([n]1)N	8	1633	DCK	other
1p5z	1p61	Yes	0.0743038	0.734801	0.484848	O=c1[nH]ccc([n]1)N	8	1633	DCK	other
4jln	4jlj	Yes	0.598953	2.96123	0.350877	FCCOc1ccccc1	10	1633	DCK	other
4jlj	4jln	Yes	1.1567	0.654828	0.350877	FCCOc1ccccc1	10	1633	DCK	other
2zia	2zi3	Yes	0.553664	0.487214	0.378378	O[C@@H]1[C@H](OCC1)C	7	1633	DCK	other
2zia	2zi5	Yes	4.45666	2.36304	0.540541	Nc1[n]c[n]c2[nH]c[n]c12	10	1633	DCK	other
2zi5	2zia	Yes	4.41112	4.5817	0.540541	Nc1[n]c[n]c2[nH]c[n]c12	10	1633	DCK	other
2zi6	2zi5	Yes	3.02372	2.18452	0.5	[nH]1c[n]c2c1[n]c[n]c2	9	1633	DCK	other
2zi5	2zi6	Yes	2.74096	3.30462	0.5	[nH]1c[n]c2c1[n]c[n]c2	9	1633	DCK	other
3ipx	1p60	Yes	0.00582591	0.310041	0.484848	O=c1[nH]ccc([n]1)N	8	1633	DCK	other
1p5z	2no1	Yes	0.296089	0.249556	0.484848	O=c1[nH]ccc([n]1)N	8	1633	DCK	other
3ipx	2no1	Yes	0.00328991	0.291725	0.484848	O=c1[nH]ccc([n]1)N	8	1633	DCK	other
2zi3	2zi5	Yes	4.87504	4.01639	0.5	[nH]1c[n]c2c1[n]c[n]c2	9	1633	DCK	other
2zi5	2zi3	Yes	3.66474	3.30378	0.5	[nH]1c[n]c2c1[n]c[n]c2	9	1633	DCK	other
3sa2	3s9u	Yes	0.826765	7.13106	0.407407	Cc1c(C#C)c([n]c([n]1)N)N	11	1085515	dfrA	other enzyme
3s9u	3sa2	Yes	0.332584	6.1729	0.407407	Cc1c(C#C)c([n]c([n]1)N)N	11	1085515	dfrA	other enzyme
3jvx	3s9u	Yes	5.63956	2.14573	0.423077	Cc1c(C#C)c([n]c([n]1)N)N	11	1085515	dfrA	other enzyme
3s9u	3jvx	Yes	0.588297	6.22406	0.423077	Cc1c(C#C)c([n]c([n]1)N)N	11	1085515	dfrA	other enzyme
3sai	3s9u	Yes	0.00916313	5.28201	0.407407	Cc1c(C#C)c([n]c([n]1)N)N	11	1085515	dfrA	other enzyme
3s9u	3sai	Yes	0.209104	5.97558	0.407407	Cc1c(C#C)c([n]c([n]1)N)N	11	1085515	dfrA	other enzyme
3sa2	3sai	Yes	0.0139603	8.14815	0.407407	Cc1c(C#C)c([n]c([n]1)N)N	11	1085515	dfrA	other enzyme
3sai	3sa2	Yes	1.35175	2.29377	0.407407	Cc1c(C#C)c([n]c([n]1)N)N	11	1085515	dfrA	other enzyme
3e0b	3sa1	Yes	0.91453	1.14605	0.44	Cc1c(C#C)c([n]c([n]1)N)N	11	1085515	dfrA	other enzyme
3sa1	3e0b	Yes	1.51064	0.616743	0.44	Cc1c(C#C)c([n]c([n]1)N)N	11	1085515	dfrA	other enzyme
3jwk	3sai	Yes	0.619337	0.572739	0.415094	Cc1c(C#C)c([n]c([n]1)N)N	11	1085515	dfrA	other enzyme
3sai	3jwk	Yes	2.79054	5.59858	0.415094	Cc1c(C#C)c([n]c([n]1)N)N	11	1085515	dfrA	other enzyme
3jvx	3sa1	Yes	5.29905	2.14102	0.423077	Cc1c(C#C)c([n]c([n]1)N)N	11	1085515	dfrA	other enzyme
3sa1	3jvx	Yes	1.59312	0.732481	0.423077	Cc1c(C#C)c([n]c([n]1)N)N	11	1085515	dfrA	other enzyme
3jvx	3fl9	Yes	5.24307	4.00941	0.434783	COc1cc(OC)ccc1	10	1085515	dfrA	other enzyme
3fl9	3jvx	Yes	2.23598	1.10503	0.434783	COc1cc(OC)ccc1	10	1085515	dfrA	other enzyme
3fl9	3jwk	Yes	2.37408	4.1275	0.425532	COc1cc(OC)ccc1	10	1085515	dfrA	other enzyme
3jwk	3fl9	Yes	5.27493	1.29749	0.425532	COc1cc(OC)ccc1	10	1085515	dfrA	other enzyme
3sa1	3s9u	Yes	2.62004	2.45684	0.407407	Cc1c(C#C)c([n]c([n]1)N)N	11	1085515	dfrA	other enzyme
3s9u	3sa1	Yes	0.315621	6.19113	0.407407	Cc1c(C#C)c([n]c([n]1)N)N	11	1085515	dfrA	other enzyme
3sa1	3sai	Yes	2.13581	1.98782	0.407407	Cc1c(C#C)c([n]c([n]1)N)N	11	1085515	dfrA	other enzyme
3sai	3sa1	Yes	0.0118806	5.51808	0.407407	Cc1c(C#C)c([n]c([n]1)N)N	11	1085515	dfrA	other enzyme
3sa1	3jwk	Yes	0.357482	0.823908	0.415094	Cc1c(C#C)c([n]c([n]1)N)N	11	1085515	dfrA	other enzyme
3jwk	3sa1	Yes	0.951181	1.28152	0.415094	Cc1c(C#C)c([n]c([n]1)N)N	11	1085515	dfrA	other enzyme
3jvx	3e0b	Yes	4.3712	7.98771	0.458333	Cc1c(C#C)c([n]c([n]1)N)N	11	1085515	dfrA	other enzyme
3e0b	3jvx	Yes	0.0375059	4.32556	0.458333	Cc1c(C#C)c([n]c([n]1)N)N	11	1085515	dfrA	other enzyme
3e0b	3s9u	Yes	0.670816	2.33152	0.44	Cc1c(C#C)c([n]c([n]1)N)N	11	1085515	dfrA	other enzyme
3s9u	3e0b	Yes	0.519018	2.04681	0.44	Cc1c(C#C)c([n]c([n]1)N)N	11	1085515	dfrA	other enzyme
3e0b	3jwk	Yes	2.89828	6.79212	0.44898	Cc1c(C#C)c([n]c([n]1)N)N	11	1085515	dfrA	other enzyme
3jwk	3e0b	Yes	0.602763	1.75135	0.44898	Cc1c(C#C)c([n]c([n]1)N)N	11	1085515	dfrA	other enzyme
3jvx	3sa2	Yes	4.51847	7.77078	0.423077	Cc1c(C#C)c([n]c([n]1)N)N	11	1085515	dfrA	other enzyme
3sa2	3jvx	Yes	1.70164	7.25895	0.423077	Cc1c(C#C)c([n]c([n]1)N)N	11	1085515	dfrA	other enzyme
3jvx	3jwk	Yes	5.07711	3.41427	0.431373	Cc1c(C#C)c([n]c([n]1)N)N	11	1085515	dfrA	other enzyme
3jwk	3jvx	Yes	0.66842	0.886692	0.431373	Cc1c(C#C)c([n]c([n]1)N)N	11	1085515	dfrA	other enzyme
3sa2	3jwk	Yes	0.0390275	3.29998	0.415094	Cc1c(C#C)c([n]c([n]1)N)N	11	1085515	dfrA	other enzyme
3jwk	3sa2	Yes	1.26815	1.50279	0.415094	Cc1c(C#C)c([n]c([n]1)N)N	11	1085515	dfrA	other enzyme
3jwk	3s9u	Yes	1.41022	1.54241	0.415094	Cc1c(C#C)c([n]c([n]1)N)N	11	1085515	dfrA	other enzyme
3s9u	3jwk	Yes	0.250318	6.41346	0.415094	Cc1c(C#C)c([n]c([n]1)N)N	11	1085515	dfrA	other enzyme
3jvx	3sai	Yes	5.25763	7.59085	0.423077	Cc1c(C#C)c([n]c([n]1)N)N	11	1085515	dfrA	other enzyme
3sai	3jvx	Yes	0.700771	7.15955	0.423077	Cc1c(C#C)c([n]c([n]1)N)N	11	1085515	dfrA	other enzyme
3sa2	3sa1	Yes	0.0323041	6.29802	0.407407	Cc1c(C#C)c([n]c([n]1)N)N	11	1085515	dfrA	other enzyme
3sa1	3sa2	Yes	2.29459	2.05258	0.407407	Cc1c(C#C)c([n]c([n]1)N)N	11	1085515	dfrA	other enzyme
3e0b	3sai	Yes	2.86566	7.03115	0.44	Cc1c(C#C)c([n]c([n]1)N)N	11	1085515	dfrA	other enzyme
3sai	3e0b	Yes	1.67908	8.33388	0.44	Cc1c(C#C)c([n]c([n]1)N)N	11	1085515	dfrA	other enzyme
3e0b	3sa2	Yes	2.84419	0.808653	0.44	Cc1c(C#C)c([n]c([n]1)N)N	11	1085515	dfrA	other enzyme
3sa2	3e0b	Yes	1.66581	4.68357	0.44	Cc1c(C#C)c([n]c([n]1)N)N	11	1085515	dfrA	other enzyme
3f0b	3f0v	Yes	1.37463	1.57933	0.428571	Cc1c(c([n]c(N)[n]1)N)C#CC	12	3794481	dfrB	other enzyme
3f0v	3f0b	Yes	7.81898	1.83869	0.428571	Cc1c(c([n]c(N)[n]1)N)C#CC	12	3794481	dfrB	other enzyme
3fq0	3f0v	Yes	2.28721	2.94457	0.461538	Cc1c(c([n]c(N)[n]1)N)C#CC	12	3794481	dfrB	other enzyme
3f0v	3fq0	Yes	6.41137	3.43265	0.461538	Cc1c(c([n]c(N)[n]1)N)C#CC	12	3794481	dfrB	other enzyme
3fqz	3f0u	Yes	2.48	2.81091	0.444444	Cc1c(c([n]c(N)[n]1)N)C#CC	12	3794481	dfrB	other enzyme
3f0u	3fqz	Yes	6.22888	6.82485	0.444444	Cc1c(c([n]c(N)[n]1)N)C#CC	12	3794481	dfrB	other enzyme
3fqo	3f0v	Yes	1.88293	2.61913	0.461538	Cc1c(c([n]c(N)[n]1)N)C#CC	12	3794481	dfrB	other enzyme
3f0v	3fqo	Yes	6.5601	8.59955	0.461538	Cc1c(c([n]c(N)[n]1)N)C#CC	12	3794481	dfrB	other enzyme
3fq0	3f0q	Yes	2.47057	2.55134	0.461538	Cc1c(c([n]c(N)[n]1)N)C#CC	12	3794481	dfrB	other enzyme
3f0q	3fq0	Yes	6.36533	3.41598	0.461538	Cc1c(c([n]c(N)[n]1)N)C#CC	12	3794481	dfrB	other enzyme
3f0q	3f0u	Yes	8.23567	7.50447	0.428571	Cc1c(c([n]c(N)[n]1)N)C#CC	12	3794481	dfrB	other enzyme
3f0u	3f0q	Yes	3.61686	5.05068	0.428571	Cc1c(c([n]c(N)[n]1)N)C#CC	12	3794481	dfrB	other enzyme
3fqv	3f0u	Yes	4.43359	4.98935	0.444444	Cc1c(c([n]c(N)[n]1)N)C#CC	12	3794481	dfrB	other enzyme
3f0u	3fqv	Yes	7.44975	3.62755	0.444444	Cc1c(c([n]c(N)[n]1)N)C#CC	12	3794481	dfrB	other enzyme
3fqz	3fq0	Yes	1.16591	1.80278	0.48	Cc1c(c([n]c(N)[n]1)N)C#CC	12	3794481	dfrB	other enzyme
3fq0	3fqz	Yes	2.66085	6.87127	0.48	Cc1c(c([n]c(N)[n]1)N)C#CC	12	3794481	dfrB	other enzyme
3fqo	3f0u	Yes	2.44949	3.19599	0.48	Cc1c(c([n]c(N)[n]1)N)C#CC	12	3794481	dfrB	other enzyme
3f0u	3fqo	Yes	7.09554	4.64142	0.48	Cc1c(c([n]c(N)[n]1)N)C#CC	12	3794481	dfrB	other enzyme
3fq0	3f0u	Yes	1.65834	2.67863	0.48	Cc1c(c([n]c(N)[n]1)N)C#CC	12	3794481	dfrB	other enzyme
3f0u	3fq0	Yes	6.6771	3.71057	0.48	Cc1c(c([n]c(N)[n]1)N)C#CC	12	3794481	dfrB	other enzyme
3fqo	3f0b	Yes	2.55046	6.61718	0.48	Cc1c(c([n]c(N)[n]1)N)C#CC	12	3794481	dfrB	other enzyme
3f0b	3fqo	Yes	6.3983	4.104	0.48	Cc1c(c([n]c(N)[n]1)N)C#CC	12	3794481	dfrB	other enzyme
3fqz	3fqo	Yes	0.0457513	1.44759	0.48	Cc1c(c([n]c(N)[n]1)N)C#CC	12	3794481	dfrB	other enzyme
3fqo	3fqz	Yes	2.5258	7.00748	0.48	Cc1c(c([n]c(N)[n]1)N)C#CC	12	3794481	dfrB	other enzyme
3fqv	3f0b	Yes	4.39002	4.20796	0.444444	Cc1c(c([n]c(N)[n]1)N)C#CC	12	3794481	dfrB	other enzyme
3f0b	3fqv	Yes	6.32452	3.74805	0.444444	Cc1c(c([n]c(N)[n]1)N)C#CC	12	3794481	dfrB	other enzyme
3f0v	3f0u	Yes	8.14934	7.45238	0.428571	Cc1c(c([n]c(N)[n]1)N)C#CC	12	3794481	dfrB	other enzyme
3f0u	3f0v	Yes	0.525349	0.730242	0.428571	Cc1c(c([n]c(N)[n]1)N)C#CC	12	3794481	dfrB	other enzyme
3fqv	3fqo	Yes	1.54172	1.26433	0.48	Cc1c(c([n]c(N)[n]1)N)C#CC	12	3794481	dfrB	other enzyme
3fqo	3fqv	Yes	2.62817	7.13372	0.48	Cc1c(c([n]c(N)[n]1)N)C#CC	12	3794481	dfrB	other enzyme
3fqz	3f0q	Yes	3.05077	2.30982	0.428571	C#C[C@H](c1cc(OC)ccc1)C	12	3794481	dfrB	other enzyme
3f0q	3fqz	Yes	3.53971	8.6085	0.428571	C#C[C@H](c1cc(OC)ccc1)C	12	3794481	dfrB	other enzyme
3f0b	3fq0	Yes	6.7092	3.27323	0.48	Cc1c(c([n]c(N)[n]1)N)C#CC	12	3794481	dfrB	other enzyme
3fq0	3f0b	Yes	2.66355	6.55181	0.48	Cc1c(c([n]c(N)[n]1)N)C#CC	12	3794481	dfrB	other enzyme
3fqv	3fq0	Yes	1.22489	1.38754	0.48	Cc1c(c([n]c(N)[n]1)N)C#CC	12	3794481	dfrB	other enzyme
3fq0	3fqv	Yes	2.73648	6.72184	0.48	Cc1c(c([n]c(N)[n]1)N)C#CC	12	3794481	dfrB	other enzyme
3f0b	3f0q	Yes	3.99134	4.61435	0.428571	Cc1c(c([n]c(N)[n]1)N)C#CC	12	3794481	dfrB	other enzyme
3f0q	3f0b	Yes	7.81959	1.83742	0.428571	Cc1c(c([n]c(N)[n]1)N)C#CC	12	3794481	dfrB	other enzyme
3fqz	3f0v	Yes	3.39634	2.66057	0.428571	C#C[C@H](c1cc(OC)ccc1)C	12	3794481	dfrB	other enzyme
3f0v	3fqz	Yes	3.43636	8.48672	0.428571	C#C[C@H](c1cc(OC)ccc1)C	12	3794481	dfrB	other enzyme
3fqz	3f0b	Yes	1.81452	1.66148	0.444444	Cc1c(c([n]c(N)[n]1)N)C#CC	12	3794481	dfrB	other enzyme
3f0b	3fqz	Yes	5.16914	4.97296	0.444444	Cc1c(c([n]c(N)[n]1)N)C#CC	12	3794481	dfrB	other enzyme
3fqv	3f0v	Yes	5.27959	4.89115	0.428571	C#C[C@H](c1cc(OC)ccc1)C	12	3794481	dfrB	other enzyme
3fqo	3f0q	Yes	2.50676	2.58456	0.461538	Cc1c(c([n]c(N)[n]1)N)C#CC	12	3794481	dfrB	other enzyme
3f0q	3fqo	Yes	6.5661	8.6004	0.461538	Cc1c(c([n]c(N)[n]1)N)C#CC	12	3794481	dfrB	other enzyme
3fqv	3f0q	Yes	4.61389	4.2535	0.428571	C#C[C@H](c1cc(OC)ccc1)C	12	3794481	dfrB	other enzyme
4igh	3fj6		0.028015	1.18354	0.645161	CC[n]1c2[n]c(=O)[nH]c(=O)c2[n]c2c1cc(c(c2)C)C	20	1723	DHODH	other
3fj6	4igh		0.422469	0.883282	0.645161	CC[n]1c2[n]c(=O)[nH]c(=O)c2[n]c2c1cc(c(c2)C)C	20	1723	DHODH	other
4igh	2b0m		0.00677757	0.628015	0.645161	CC[n]1c2[n]c(=O)[nH]c(=O)c2[n]c2c1cc(c(c2)C)C	20	1723	DHODH	other
2b0m	4igh		0.00855909	0.883407	0.645161	CC[n]1c2[n]c(=O)[nH]c(=O)c2[n]c2c1cc(c(c2)C)C	20	1723	DHODH	other
3u2o	4igh		0.422931	0.882937	0.645161	CC[n]1c2[n]c(=O)[nH]c(=O)c2[n]c2c1cc(c(c2)C)C	20	1723	DHODH	other
4igh	3u2o		0.00295122	1.17986	0.645161	CC[n]1c2[n]c(=O)[nH]c(=O)c2[n]c2c1cc(c(c2)C)C	20	1723	DHODH	other
4igh	3g0u		0.012621	0.347838	0.645161	CC[n]1c2[n]c(=O)[nH]c(=O)c2[n]c2c1cc(c(c2)C)C	20	1723	DHODH	other
3g0u	4igh		0.42309	0.882909	0.645161	CC[n]1c2[n]c(=O)[nH]c(=O)c2[n]c2c1cc(c(c2)C)C	20	1723	DHODH	other
4igh	3w7r		0.118242	1.19139	0.645161	CC[n]1c2[n]c(=O)[nH]c(=O)c2[n]c2c1cc(c(c2)C)C	20	1723	DHODH	other
3w7r	4igh		0.422282	0.882424	0.645161	CC[n]1c2[n]c(=O)[nH]c(=O)c2[n]c2c1cc(c(c2)C)C	20	1723	DHODH	other
4igh	2prh		0.00399193	0.882075	0.645161	CC[n]1c2[n]c(=O)[nH]c(=O)c2[n]c2c1cc(c(c2)C)C	20	1723	DHODH	other
2prh	4igh		0.931406	0.88434	0.645161	CC[n]1c2[n]c(=O)[nH]c(=O)c2[n]c2c1cc(c(c2)C)C	20	1723	DHODH	other
4igh	4ls2		0.016588	1.03405	0.645161	CC[n]1c2[n]c(=O)[nH]c(=O)c2[n]c2c1cc(c(c2)C)C	20	1723	DHODH	other
4ls2	4igh		0.42351	0.881939	0.645161	CC[n]1c2[n]c(=O)[nH]c(=O)c2[n]c2c1cc(c(c2)C)C	20	1723	DHODH	other
4oqv	4igh		0.423099	0.88401	0.645161	CC[n]1c2[n]c(=O)[nH]c(=O)c2[n]c2c1cc(c(c2)C)C	20	1723	DHODH	other
4igh	4oqv		0.101076	0.890818	0.645161	CC[n]1c2[n]c(=O)[nH]c(=O)c2[n]c2c1cc(c(c2)C)C	20	1723	DHODH	other
4igh	1d3g		0.0238503	0.942445	0.645161	CC[n]1c2[n]c(=O)[nH]c(=O)c2[n]c2c1cc(c(c2)C)C	20	1723	DHODH	other
1d3g	4igh		0.422213	0.883343	0.645161	CC[n]1c2[n]c(=O)[nH]c(=O)c2[n]c2c1cc(c(c2)C)C	20	1723	DHODH	other
3fjl	4igh		0.42346	0.882784	0.645161	CC[n]1c2[n]c(=O)[nH]c(=O)c2[n]c2c1cc(c(c2)C)C	20	1723	DHODH	other
4igh	3fjl		0.00592153	0.982762	0.645161	CC[n]1c2[n]c(=O)[nH]c(=O)c2[n]c2c1cc(c(c2)C)C	20	1723	DHODH	other
4igh	4ls0		0.0358905	1.14697	0.645161	CC[n]1c2[n]c(=O)[nH]c(=O)c2[n]c2c1cc(c(c2)C)C	20	1723	DHODH	other
4ls0	4igh		0.422822	0.880855	0.645161	CC[n]1c2[n]c(=O)[nH]c(=O)c2[n]c2c1cc(c(c2)C)C	20	1723	DHODH	other
4igh	3zws		0.00440674	1.10038	0.645161	CC[n]1c2[n]c(=O)[nH]c(=O)c2[n]c2c1cc(c(c2)C)C	20	1723	DHODH	other
3zws	4igh		0.00609865	0.883584	0.645161	CC[n]1c2[n]c(=O)[nH]c(=O)c2[n]c2c1cc(c(c2)C)C	20	1723	DHODH	other
4igh	2fpy		0.00783911	1.18474	0.645161	CC[n]1c2[n]c(=O)[nH]c(=O)c2[n]c2c1cc(c(c2)C)C	20	1723	DHODH	other
2fpy	4igh		0.423212	0.882887	0.645161	CC[n]1c2[n]c(=O)[nH]c(=O)c2[n]c2c1cc(c(c2)C)C	20	1723	DHODH	other
4igh	2prl		0.00921604	1.36168	0.645161	CC[n]1c2[n]c(=O)[nH]c(=O)c2[n]c2c1cc(c(c2)C)C	20	1723	DHODH	other
2prl	4igh		0.00497088	0.881934	0.645161	CC[n]1c2[n]c(=O)[nH]c(=O)c2[n]c2c1cc(c(c2)C)C	20	1723	DHODH	other
4igh	3kvm		0.011506	1.08953	0.645161	CC[n]1c2[n]c(=O)[nH]c(=O)c2[n]c2c1cc(c(c2)C)C	20	1723	DHODH	other
3kvm	4igh		0.423571	0.882847	0.645161	CC[n]1c2[n]c(=O)[nH]c(=O)c2[n]c2c1cc(c(c2)C)C	20	1723	DHODH	other
4igh	2fpt		0.0130322	0.85057	0.645161	CC[n]1c2[n]c(=O)[nH]c(=O)c2[n]c2c1cc(c(c2)C)C	20	1723	DHODH	other
2fpt	4igh		0.423107	0.882773	0.645161	CC[n]1c2[n]c(=O)[nH]c(=O)c2[n]c2c1cc(c(c2)C)C	20	1723	DHODH	other
4igh	4jgd		0.0119353	0.880315	0.645161	CC[n]1c2[n]c(=O)[nH]c(=O)c2[n]c2c1cc(c(c2)C)C	20	1723	DHODH	other
4jgd	4igh		0.422602	0.881858	0.645161	CC[n]1c2[n]c(=O)[nH]c(=O)c2[n]c2c1cc(c(c2)C)C	20	1723	DHODH	other
2fqi	4igh		0.422126	0.883117	0.645161	CC[n]1c2[n]c(=O)[nH]c(=O)c2[n]c2c1cc(c(c2)C)C	20	1723	DHODH	other
4igh	2fqi		0.00910512	1.00256	0.645161	CC[n]1c2[n]c(=O)[nH]c(=O)c2[n]c2c1cc(c(c2)C)C	20	1723	DHODH	other
2bxv	4igh		0.423063	0.883307	0.645161	CC[n]1c2[n]c(=O)[nH]c(=O)c2[n]c2c1cc(c(c2)C)C	20	1723	DHODH	other
4igh	2bxv		0.0112451	0.913074	0.645161	CC[n]1c2[n]c(=O)[nH]c(=O)c2[n]c2c1cc(c(c2)C)C	20	1723	DHODH	other
2fpv	4igh		0.00739224	0.882977	0.645161	CC[n]1c2[n]c(=O)[nH]c(=O)c2[n]c2c1cc(c(c2)C)C	20	1723	DHODH	other
4igh	2fpv		0.00285115	1.2003	0.645161	CC[n]1c2[n]c(=O)[nH]c(=O)c2[n]c2c1cc(c(c2)C)C	20	1723	DHODH	other
4igh	4js3		0.00806026	1.19084	0.645161	CC[n]1c2[n]c(=O)[nH]c(=O)c2[n]c2c1cc(c(c2)C)C	20	1723	DHODH	other
4js3	4igh		0.421641	0.881281	0.645161	CC[n]1c2[n]c(=O)[nH]c(=O)c2[n]c2c1cc(c(c2)C)C	20	1723	DHODH	other
4igh	1d3h		0.00948853	0.864688	0.645161	CC[n]1c2[n]c(=O)[nH]c(=O)c2[n]c2c1cc(c(c2)C)C	20	1723	DHODH	other
1d3h	4igh		0.00358761	0.881058	0.645161	CC[n]1c2[n]c(=O)[nH]c(=O)c2[n]c2c1cc(c(c2)C)C	20	1723	DHODH	other
4igh	3zwt		0.1087	0.869335	0.645161	CC[n]1c2[n]c(=O)[nH]c(=O)c2[n]c2c1cc(c(c2)C)C	20	1723	DHODH	other
3zwt	4igh		0.422663	0.882106	0.645161	CC[n]1c2[n]c(=O)[nH]c(=O)c2[n]c2c1cc(c(c2)C)C	20	1723	DHODH	other
4igh	3kvl		0.144395	0.898573	0.645161	CC[n]1c2[n]c(=O)[nH]c(=O)c2[n]c2c1cc(c(c2)C)C	20	1723	DHODH	other
3kvl	4igh		0.422641	0.883302	0.645161	CC[n]1c2[n]c(=O)[nH]c(=O)c2[n]c2c1cc(c(c2)C)C	20	1723	DHODH	other
4igh	3f1q		0.0157787	1.10955	0.645161	CC[n]1c2[n]c(=O)[nH]c(=O)c2[n]c2c1cc(c(c2)C)C	20	1723	DHODH	other
3f1q	4igh		0.421973	0.882713	0.645161	CC[n]1c2[n]c(=O)[nH]c(=O)c2[n]c2c1cc(c(c2)C)C	20	1723	DHODH	other
4igh	3kvk		0.00317754	1.10923	0.645161	CC[n]1c2[n]c(=O)[nH]c(=O)c2[n]c2c1cc(c(c2)C)C	20	1723	DHODH	other
3kvk	4igh		0.422727	0.882492	0.645161	CC[n]1c2[n]c(=O)[nH]c(=O)c2[n]c2c1cc(c(c2)C)C	20	1723	DHODH	other
4igh	4jts		0.0159566	1.19483	0.645161	CC[n]1c2[n]c(=O)[nH]c(=O)c2[n]c2c1cc(c(c2)C)C	20	1723	DHODH	other
4jts	4igh		0.423223	0.881717	0.645161	CC[n]1c2[n]c(=O)[nH]c(=O)c2[n]c2c1cc(c(c2)C)C	20	1723	DHODH	other
3kvj	4igh		0.423003	0.882974	0.645161	CC[n]1c2[n]c(=O)[nH]c(=O)c2[n]c2c1cc(c(c2)C)C	20	1723	DHODH	other
4igh	3kvj		0.0104866	0.882988	0.645161	CC[n]1c2[n]c(=O)[nH]c(=O)c2[n]c2c1cc(c(c2)C)C	20	1723	DHODH	other
2wv8	4igh		0.00597846	0.882967	0.645161	CC[n]1c2[n]c(=O)[nH]c(=O)c2[n]c2c1cc(c(c2)C)C	20	1723	DHODH	other
4igh	2wv8		1.1485	0.967177	0.645161	CC[n]1c2[n]c(=O)[nH]c(=O)c2[n]c2c1cc(c(c2)C)C	20	1723	DHODH	other
4igh	3g0x		0.00955122	1.13968	0.645161	CC[n]1c2[n]c(=O)[nH]c(=O)c2[n]c2c1cc(c(c2)C)C	20	1723	DHODH	other
3g0x	4igh		0.423618	0.881343	0.645161	CC[n]1c2[n]c(=O)[nH]c(=O)c2[n]c2c1cc(c(c2)C)C	20	1723	DHODH	other
4igh	4ls1		0.361662	1.13697	0.645161	CC[n]1c2[n]c(=O)[nH]c(=O)c2[n]c2c1cc(c(c2)C)C	20	1723	DHODH	other
4ls1	4igh		0.422445	0.883118	0.645161	CC[n]1c2[n]c(=O)[nH]c(=O)c2[n]c2c1cc(c(c2)C)C	20	1723	DHODH	other
4igh	4jtu		0.670799	0.945101	0.645161	CC[n]1c2[n]c(=O)[nH]c(=O)c2[n]c2c1cc(c(c2)C)C	20	1723	DHODH	other
4jtu	4igh		0.422706	0.882564	0.645161	CC[n]1c2[n]c(=O)[nH]c(=O)c2[n]c2c1cc(c(c2)C)C	20	1723	DHODH	other
4igh	4jtt		0.00726236	0.973929	0.645161	CC[n]1c2[n]c(=O)[nH]c(=O)c2[n]c2c1cc(c(c2)C)C	20	1723	DHODH	other
4jtt	4igh		0.423231	0.881482	0.645161	CC[n]1c2[n]c(=O)[nH]c(=O)c2[n]c2c1cc(c(c2)C)C	20	1723	DHODH	other
1ot3	1zm7	Yes	0.0049705	5.59973	0.391304	Cc1c[nH]c(=O)[nH]c1=O	9	42273	dnk	kinase
1ot3	2jcs	Yes	0.746963		0.391304	Cc1c[nH]c(=O)[nH]c1=O	9	42273	dnk	kinase
1ot3	1oe0	Yes	0.00602934		0.391304	Cc1c[nH]c(=O)[nH]c1=O	9	42273	dnk	kinase
2vp4	2jcs		0.497051	12.6906	0.421053	OP(=O)OP(=O)(OP(=O)([O-])[O-])[O-]	12	42273	dnk	kinase
2vpp	2vp5	Yes	0.00254951	1.41046	0.941176	O=c1[n]([C@@H]2O[C@H](CO)[C@H](C2)O)ccc([n]1)N	16	42273	dnk	kinase
2vp2	2jcs		0.525798	13.2131	0.4	OP(=O)OP(=O)(OP(=O)([O-])[O-])[O-]	12	42273	dnk	kinase
2jcs	2vp2		0.159928	0.456737	0.4	OP(=O)OP(=O)(OP(=O)([O-])[O-])[O-]	12	42273	dnk	kinase
2vp4	2vp0		0.565578	12.8303	0.421053	OP(=O)OP(=O)(OP(=O)([O-])[O-])[O-]	12	42273	dnk	kinase
1ot3	2vp0	Yes	0.471361		0.391304	Cc1c[nH]c(=O)[nH]c1=O	9	42273	dnk	kinase
2vp5	2vp4	Yes	0.244704	1.88036	0.727273	O=c1[n]([C@@H]2O[C@H](CO)[C@H](C2)O)ccc([n]1)N	16	42273	dnk	kinase
2vp2	1zm7		0.00730444	0.831733	0.4	OP(=O)OP(=O)(OP(=O)([O-])[O-])[O-]	12	42273	dnk	kinase
1zm7	2vp2		0.142067	0.452271	0.4	OP(=O)OP(=O)(OP(=O)([O-])[O-])[O-]	12	42273	dnk	kinase
2vp2	2vp0		0.00816365	12.9019	0.4	OP(=O)OP(=O)(OP(=O)([O-])[O-])[O-]	12	42273	dnk	kinase
2vp0	2vp2		0.144153	0.451099	0.4	OP(=O)OP(=O)(OP(=O)([O-])[O-])[O-]	12	42273	dnk	kinase
2vpp	2vp4	Yes	0.00305505	7.05205	0.695652	O=c1[n]([C@@H]2O[C@H](CO)[C@H](C2)O)ccc([n]1)N	16	42273	dnk	kinase
2vp4	1zm7		0.740479	3.93238	0.421053	OP(=O)OP(=O)(OP(=O)([O-])[O-])[O-]	12	42273	dnk	kinase
2vp2	1oe0		0.566009	13.7478	0.4	OP(=O)OP(=O)(OP(=O)([O-])[O-])[O-]	12	42273	dnk	kinase
1oe0	2vp2		0.144958	0.452155	0.4	OP(=O)OP(=O)(OP(=O)([O-])[O-])[O-]	12	42273	dnk	kinase
2vp4	1oe0		1.14452	12.8124	0.421053	OP(=O)OP(=O)(OP(=O)([O-])[O-])[O-]	12	42273	dnk	kinase
2vp4	2vp2		0.0609851	0.637369	0.40678	OP(=O)OP(=O)(OP(=O)([O-])[O-])[O-]	12	42273	dnk	kinase
4fyi	4p5d	Yes	0.58867	2.29355	0.4	O[C@H]1CO[C@H](COP(=O)([O-])[O-])C1	12	171047	Dnph1	other enzyme
4p5d	4fyi		1.43264	5.60981	0.4	O[C@H]1CO[C@H](COP(=O)([O-])[O-])C1	12	171047	Dnph1	other enzyme
4p5d	4kxl		1.08542	3.53321	0.4	O[C@H]1CO[C@H](COP(=O)([O-])[O-])C1	12	171047	Dnph1	other enzyme
4kxl	4p5d	Yes	0.725095	2.38201	0.4	O[C@H]1CO[C@H](COP(=O)([O-])[O-])C1	12	171047	Dnph1	other enzyme
4kxn	4fyh		3.88616	2.87927	0.428571	O[C@H]1CO[C@H](COP(=O)([O-])[O-])C1	12	171047	Dnph1	other enzyme
4fyh	4kxn	Yes	1.44081	1.70182	0.428571	O[C@H]1CO[C@H](COP(=O)([O-])[O-])C1	12	171047	Dnph1	other enzyme
4kxn	4kxl		2.13604	2.61117	0.421053	O[C@H]1CO[C@H](COP(=O)([O-])[O-])C1	12	171047	Dnph1	other enzyme
4kxl	4kxn	Yes	0.853132	1.32748	0.421053	O[C@H]1CO[C@H](COP(=O)([O-])[O-])C1	12	171047	Dnph1	other enzyme
4fyi	4fyh	Yes	0.918816	4.02342	0.436364	O[C@H]1CO[C@H](COP(=O)([O-])[O-])C1	12	171047	Dnph1	other enzyme
4fyh	4fyi	Yes	0.213679	3.80261	0.436364	O[C@H]1CO[C@H](COP(=O)([O-])[O-])C1	12	171047	Dnph1	other enzyme
4fyi	4kxn	Yes	1.5585	2.66833	0.421053	O[C@H]1CO[C@H](COP(=O)([O-])[O-])C1	12	171047	Dnph1	other enzyme
4kxn	4fyi		2.13751	6.03396	0.421053	O[C@H]1CO[C@H](COP(=O)([O-])[O-])C1	12	171047	Dnph1	other enzyme
4kxn	4p5d		1.73729	2.19891	0.393443	O[C@H]1CO[C@H](COP(=O)([O-])[O-])C1	12	171047	Dnph1	other enzyme
4p5d	4kxn		3.55675	3.41313	0.393443	O[C@H]1CO[C@H](COP(=O)([O-])[O-])C1	12	171047	Dnph1	other enzyme
4fyh	4p5d	Yes	0.116429	4.36076	0.40678	O[C@H]1CO[C@H](COP(=O)([O-])[O-])C1	12	171047	Dnph1	other enzyme
4p5d	4fyh		3.75638	4.55342	0.40678	O[C@H]1CO[C@H](COP(=O)([O-])[O-])C1	12	171047	Dnph1	other enzyme
4fyh	4kxl	Yes	0.0101762	1.23137	0.436364	O[C@H]1CO[C@H](COP(=O)([O-])[O-])C1	12	171047	Dnph1	other enzyme
4kxl	4fyh	Yes	0.928873	3.97692	0.436364	O[C@H]1CO[C@H](COP(=O)([O-])[O-])C1	12	171047	Dnph1	other enzyme
3qox	3qow	Yes	0.006451	0.50944	0.603774	O[C@@H]1CO[C@@H]([n]2c[n]c3c(N)[n]c[n]c23)C1	16	84444	DOT1L	other enzyme
4ek9	1nw3	Yes	0.705972		0.666667	O[C@@H]1CO[C@@H]([n]2c[n]c3c(N)[n]c[n]c23)C1	16	84444	DOT1L	other enzyme
3qox	1nw3	Yes	0.911484		0.603774	O[C@@H]1CO[C@@H]([n]2c[n]c3c(N)[n]c[n]c23)C1	16	84444	DOT1L	other enzyme
3qox	4ek9	Yes	0.563602	0.971622	0.680851	O[C@@H]1CO[C@@H]([n]2c[n]c3c(N)[n]c[n]c23)C1	16	84444	DOT1L	other enzyme
4ek9	3qox	Yes	0.705253	0.846601	0.680851	O[C@@H]1CO[C@@H]([n]2c[n]c3c(N)[n]c[n]c23)C1	16	84444	DOT1L	other enzyme
4ek9	3qow	Yes	0.760656	0.79151	0.666667	O[C@@H]1CO[C@@H]([n]2c[n]c3c(N)[n]c[n]c23)C1	16	84444	DOT1L	other enzyme
3sx0	3sr4	Yes	0.00728774	0.706449	0.555556	O[C@H]1CO[C@@H](C1)CSCC[C@H]([NH3+])C(=O)[O-]	15	84444	DOT1L	other enzyme
3sr4	3sx0	Yes	1.79798		0.555556	O[C@H]1CO[C@@H](C1)CSCC[C@H]([NH3+])C(=O)[O-]	15	84444	DOT1L	other enzyme
3sx0	3qox	Yes	0.0375795	0.575753	0.566038	O[C@H]1CO[C@@H](C1)CSCC[C@H]([NH3+])C(=O)[O-]	15	84444	DOT1L	other enzyme
3qox	3sx0	Yes	0.00961169		0.566038	O[C@H]1CO[C@@H](C1)CSCC[C@H]([NH3+])C(=O)[O-]	15	84444	DOT1L	other enzyme
3qox	3sr4	Yes	0.00691431	0.695506	0.566038	O[C@H]1CO[C@@H](C1)CSCC[C@H]([NH3+])C(=O)[O-]	15	84444	DOT1L	other enzyme
3sr4	3qox	Yes	0.299053	0.530039	0.566038	O[C@H]1CO[C@@H](C1)CSCC[C@H]([NH3+])C(=O)[O-]	15	84444	DOT1L	other enzyme
1ov7	1ov5	Yes	0.542289	0.530649	0.952381	Oc1c(CC=C)cccc1	10	1258585	E	other enzyme
1ov5	1ov7	Yes	0.00368782	0.552495	0.952381	Oc1c(CC=C)cccc1	10	1258585	E	other enzyme
2rbs	1owy		1.45477	0.901552	0.857143	CCCc1ccccc1	9	1258585	E	other enzyme
1owy	2rbs	Yes	2.26212	0.796016	0.857143	CCCc1ccccc1	9	1258585	E	other enzyme
2rbr	3hu8	Yes	0.798752	1.3681	0.9	CCOc1ccccc1	9	1258585	E	other enzyme
3hu8	2rbr	Yes	2.08932	2.12115	0.9	CCOc1ccccc1	9	1258585	E	other enzyme
1ov7	4i7m	Yes	0.426426	0.772061	0.952381	Oc1c(CC=C)cccc1	10	1258585	E	other enzyme
1owy	184l	Yes	0.218003	0.578085	0.9	CCCc1ccccc1	9	1258585	E	other enzyme
3htb	3ht7	Yes	0.77081	0.755558	0.947368	Oc1c(CC)cccc1	9	1258585	E	other enzyme
186l	3htb		1.28831	1.45203	0.9	CCCc1ccccc1	9	1258585	E	other enzyme
3htb	186l	Yes	0.998753	0.801136	0.9	CCCc1ccccc1	9	1258585	E	other enzyme
2rbr	2ray	Yes	0.615218	0.614223	0.9	CCOc1ccccc1	9	1258585	E	other enzyme
2ray	2rbr		0.00636396		0.9	CCOc1ccccc1	9	1258585	E	other enzyme
3htb	184l	Yes	0.349734	0.775365	0.9	CCCc1ccccc1	9	1258585	E	other enzyme
186l	1owy		0.691769	1.09282	0.9	CCCc1ccccc1	9	1258585	E	other enzyme
1owy	186l	Yes	1.49037	0.636827	0.9	CCCc1ccccc1	9	1258585	E	other enzyme
186l	2rbs		0.0062849	0.972776	0.857143	CCCc1ccccc1	9	1258585	E	other enzyme
2rbs	186l		1.17962	1.19463	0.857143	CCCc1ccccc1	9	1258585	E	other enzyme
2rbs	3htb		0.526476	0.820678	0.857143	CCCc1ccccc1	9	1258585	E	other enzyme
3htb	2rbs	Yes	1.32476	0.739546	0.857143	CCCc1ccccc1	9	1258585	E	other enzyme
2rb1	2ray	Yes	2.0986	0.592266	0.9	CCOc1ccccc1	9	1258585	E	other enzyme
2ray	2rb1		0.0215198		0.9	CCOc1ccccc1	9	1258585	E	other enzyme
1owy	3htb	Yes	0.450232	0.310458	0.9	CCCc1ccccc1	9	1258585	E	other enzyme
3htb	1owy	Yes	0.304895	0.249167	0.9	CCCc1ccccc1	9	1258585	E	other enzyme
2rbr	2rb1	Yes	0.72105	1.34741	0.9	CCOc1ccccc1	9	1258585	E	other enzyme
2rb1	2rbr	Yes	2.08886	2.12082	0.9	CCOc1ccccc1	9	1258585	E	other enzyme
2rbs	184l		0.563885	1.05229	0.857143	CCCc1ccccc1	9	1258585	E	other enzyme
4ekq	4ekp		0.00167332	4.10357	0.842105	O=[NH+]c1ccccc1	8	1258585	E	other enzyme
2ray	3hu8		0.026467		0.9	CCOc1ccccc1	9	1258585	E	other enzyme
3hu8	2ray	Yes	2.09857	0.592827	0.9	CCOc1ccccc1	9	1258585	E	other enzyme
2v8w	4tqb		3.96681	2.20421	0.363636	O=P(OP(=O)(OP(=O)([O-])[O-])[O-])[O-]	12	1977	EIF4E	other
4aza	3am7		7.84018	2.57195	0.363636	O=P(OP(=O)(OP(=O)([O-])[O-])[O-])[O-]	12	1977	EIF4E	other
3am7	4aza		3.22199	4.65494	0.363636	O=P(OP(=O)(OP(=O)([O-])[O-])[O-])[O-]	12	1977	EIF4E	other
3am7	4tpw		2.90625	3.13263	0.363636	O=P(OP(=O)(OP(=O)([O-])[O-])[O-])[O-]	12	1977	EIF4E	other
1ipc	4tqb		2.06058	2.97767	0.363636	O=P(OP(=O)(OP(=O)([O-])[O-])[O-])[O-]	12	1977	EIF4E	other
2w97	3am7		7.85821	2.61436	0.363636	O=P(OP(=O)(OP(=O)([O-])[O-])[O-])[O-]	12	1977	EIF4E	other
3am7	2w97		3.66005	3.04289	0.363636	O=P(OP(=O)(OP(=O)([O-])[O-])[O-])[O-]	12	1977	EIF4E	other
2v8w	3am7		7.85221	2.57422	0.363636	O=P(OP(=O)(OP(=O)([O-])[O-])[O-])[O-]	12	1977	EIF4E	other
3am7	2v8w		0.606135	4.72335	0.363636	O=P(OP(=O)(OP(=O)([O-])[O-])[O-])[O-]	12	1977	EIF4E	other
2w97	1ipc		6.86424	2.14661	0.363636	O=P(OP(=O)(OP(=O)([O-])[O-])[O-])[O-]	12	1977	EIF4E	other
1ipc	2w97		3.61437	3.19327	0.363636	O=P(OP(=O)(OP(=O)([O-])[O-])[O-])[O-]	12	1977	EIF4E	other
2v8w	1ipc		6.85125	2.09827	0.363636	O=P(OP(=O)(OP(=O)([O-])[O-])[O-])[O-]	12	1977	EIF4E	other
1ipc	2v8w		0.606049	4.72366	0.363636	O=P(OP(=O)(OP(=O)([O-])[O-])[O-])[O-]	12	1977	EIF4E	other
4tqb	3am7		3.65408	2.04518	0.363636	O=P(OP(=O)(OP(=O)([O-])[O-])[O-])[O-]	12	1977	EIF4E	other
3am7	4tqb		2.05861	2.93108	0.363636	O=P(OP(=O)(OP(=O)([O-])[O-])[O-])[O-]	12	1977	EIF4E	other
4aza	1ipc		6.84069	2.08978	0.363636	O=P(OP(=O)(OP(=O)([O-])[O-])[O-])[O-]	12	1977	EIF4E	other
1ipc	4aza		3.21085	4.68684	0.363636	O=P(OP(=O)(OP(=O)([O-])[O-])[O-])[O-]	12	1977	EIF4E	other
2vx0	2vwu	Yes	3.46745	1.26532	0.31746	Clc1ccc2c(c1)OCO2	10	2050	EPHB4	kinase
2vwu	2vx0	Yes	1.80484	1.66554	0.31746	Clc1ccc2c(c1)OCO2	10	2050	EPHB4	kinase
2vwu	2vwz	Yes	1.1777		0.322581	Clc1ccc2c(c1)OCO2	10	2050	EPHB4	kinase
2vwz	2vwu	Yes	1.35343	3.50146	0.322581	Clc1ccc2c(c1)OCO2	10	2050	EPHB4	kinase
2vwu	2vx1	Yes	1.62946		0.333333	Clc1ccc2c(c1)OCO2	10	2050	EPHB4	kinase
2vx1	2vwu	Yes	0.625397	2.42394	0.333333	Clc1ccc2c(c1)OCO2	10	2050	EPHB4	kinase
2vwy	2vwu	Yes	1.60586	2.76861	0.327869	Clc1ccc2c(c1)OCO2	10	2050	EPHB4	kinase
2vwu	2vwy	Yes	1.31636		0.327869	Clc1ccc2c(c1)OCO2	10	2050	EPHB4	kinase
2vwu	2vwx	Yes	1.25071		0.327869	Clc1ccc2c(c1)OCO2	10	2050	EPHB4	kinase
2vwx	2vwu	Yes	2.23926	2.58363	0.327869	Clc1ccc2c(c1)OCO2	10	2050	EPHB4	kinase
2vww	2vwu	Yes	0.0129949	0.749528	0.31746	Clc1ccc2c(c1)OCO2	10	2050	EPHB4	kinase
2vwu	2vww	Yes	1.75935	0.759109	0.31746	Clc1ccc2c(c1)OCO2	10	2050	EPHB4	kinase
2vww	2vwv	Yes	3.00561	0.722123	0.372881	Nc1cc(cc(c1)OC)OC	11	2050	EPHB4	kinase
2vwv	2vww	Yes	4.67816	7.86529	0.372881	Nc1cc(cc(c1)OC)OC	11	2050	EPHB4	kinase
4iui	4iw8		1.29326	0.776847	0.509804	FC(c1c2[nH][n]cc2ccc1)(F)F	13	2099	ESR1	NHR
4iw8	4iui		0.369163	0.87023	0.509804	FC(c1c2[nH][n]cc2ccc1)(F)F	13	2099	ESR1	NHR
1xp1	1sj0	Yes	1.31569	5.18602	0.716418	Oc1ccc([C@@H]2Oc3c(S[C@@H]2c2ccc(O)cc2)cccc3)cc1	24	2099	ESR1	NHR
1sj0	1xp1	Yes	1.32362	0.74088	0.716418	Oc1ccc([C@@H]2Oc3c(S[C@@H]2c2ccc(O)cc2)cccc3)cc1	24	2099	ESR1	NHR
2p15	3q95	Yes	1.51747		0.716981	O[C@@H]1[C@]2(C)[C@H]([C@H]3[C@H](CC2)c2c(CC3)cccc2)CC1	19	2099	ESR1	NHR
3q95	2p15	Yes	0.717335	0.479302	0.716981	O[C@@H]1[C@]2(C)[C@H]([C@H]3[C@H](CC2)c2c(CC3)cccc2)CC1	19	2099	ESR1	NHR
3osa	3os9		2.51142	1.55721	0.72	C[n]1[n]c(c2c1cccc2)c1c(cc(cc1)O)O	18	2099	ESR1	NHR
3os9	3osa		1.114	0.944128	0.72	C[n]1[n]c(c2c1cccc2)c1c(cc(cc1)O)O	18	2099	ESR1	NHR
2qzo	4iw8		0.720727	0.866681	0.52	FC(c1c2[nH][n]cc2ccc1)(F)F	13	2099	ESR1	NHR
4iw8	2qzo		0.431393	1.50679	0.52	FC(c1c2[nH][n]cc2ccc1)(F)F	13	2099	ESR1	NHR
4iv4	4iu7		0.218413	0.34358	0.875	Oc1c(c2[n]([n]c3c2cccc3C(F)(F)F)C)cccc1	21	2099	ESR1	NHR
4iu7	4iv4		0.00662997	1.45416	0.875	Oc1c(c2[n]([n]c3c2cccc3C(F)(F)F)C)cccc1	21	2099	ESR1	NHR
2qxs	1uom	Yes	0.00825156	1.78651	0.454545	O(c1ccccc1)CC[NH+]1CCCCC1	15	2099	ESR1	NHR
1uom	2qxs	Yes	0.681728	1.28771	0.454545	O(c1ccccc1)CC[NH+]1CCCCC1	15	2099	ESR1	NHR
3l03	2g5o	Yes	0.227413	0.611904	0.869565	C[C@]12CC[C@H]3[C@H]([C@@H]1CC[C@@H]2O)CCc1c3ccc(O)c1	20	2099	ESR1	NHR
2g5o	3l03	Yes	0.251543	3.63793	0.869565	C[C@]12CC[C@H]3[C@H]([C@@H]1CC[C@@H]2O)CCc1c3ccc(O)c1	20	2099	ESR1	NHR
2qxs	1sj0	Yes	1.14502	1.26992	0.447761	O(c1ccccc1)CC[NH+]1CCCCC1	15	2099	ESR1	NHR
1sj0	2qxs	Yes	5.21917	0.500053	0.447761	O(c1ccccc1)CC[NH+]1CCCCC1	15	2099	ESR1	NHR
4iui	2qzo		0.955689	1.04672	0.734694	C[n]1[n]c(c2c1cccc2)c1c(cc(cc1)O)O	18	2099	ESR1	NHR
2qzo	4iui		0.74874	3.26319	0.734694	C[n]1[n]c(c2c1cccc2)c1c(cc(cc1)O)O	18	2099	ESR1	NHR
3l03	2p15	Yes	0.00342451	0.592282	0.740741	C[C@]12CC[C@H]3[C@H]([C@@H]1CC[C@@H]2O)CCc1c3ccc(O)c1	20	2099	ESR1	NHR
2qab	2qgw	Yes	0.515649	0.697814	0.864865	Oc1ccc([n]2[n]c3c(c2)cccc3)cc1	16	2099	ESR1	NHR
2qgw	2qab	Yes	0.541108	0.611582	0.864865	Oc1ccc([n]2[n]c3c(c2)cccc3)cc1	16	2099	ESR1	NHR
3os9	3os8		1.17052	3.52859	0.692308	C[n]1[n]c(c2c1cccc2)c1c(cc(cc1)O)O	18	2099	ESR1	NHR
3os8	3os9		2.34407	1.40465	0.692308	C[n]1[n]c(c2c1cccc2)c1c(cc(cc1)O)O	18	2099	ESR1	NHR
4iv2	2qzo		1.45693	0.593555	0.734694	C[n]1[n]c(c2c1cccc2)c1c(cc(cc1)O)O	18	2099	ESR1	NHR
2qzo	4iv2		1.22664	3.58607	0.734694	C[n]1[n]c(c2c1cccc2)c1c(cc(cc1)O)O	18	2099	ESR1	NHR
4iw6	4iu7		0.857725	0.41999	0.875	Oc1c(c2[n]([n]c3c2cccc3C(F)(F)F)C)cccc1	21	2099	ESR1	NHR
4iu7	4iw6		0.162117	0.324538	0.875	Oc1c(c2[n]([n]c3c2cccc3C(F)(F)F)C)cccc1	21	2099	ESR1	NHR
4iv2	4iui		0.0943048	3.42438	0.72	C[n]1[n]c(c2c1cccc2)c1c(cc(cc1)O)O	18	2099	ESR1	NHR
4iui	4iv2		1.08388	0.734924	0.72	C[n]1[n]c(c2c1cccc2)c1c(cc(cc1)O)O	18	2099	ESR1	NHR
2qxs	1yin	Yes	0.833572	5.13041	0.434783	O(c1ccccc1)CC[NH+]1CCCCC1	15	2099	ESR1	NHR
1yin	2qxs	Yes	0.0056163	0.590215	0.434783	O(c1ccccc1)CC[NH+]1CCCCC1	15	2099	ESR1	NHR
1sj0	1uom	Yes	5.30692	0.845711	0.461538	O(c1ccccc1)CC[NH+]1CCCCC1	15	2099	ESR1	NHR
1uom	1sj0	Yes	0.673171	0.926304	0.461538	O(c1ccccc1)CC[NH+]1CCCCC1	15	2099	ESR1	NHR
2g5o	3q95	Yes	0.612739		0.844444	O[C@@H]1[C@]2(C)[C@H]([C@H]3[C@H](CC2)c2c(CC3)cccc2)CC1	19	2099	ESR1	NHR
3q95	2g5o	Yes	0.738985	0.293593	0.844444	O[C@@H]1[C@]2(C)[C@H]([C@H]3[C@H](CC2)c2c(CC3)cccc2)CC1	19	2099	ESR1	NHR
1sj0	1yin	Yes	4.32315	0.672786	0.441176	O(c1ccccc1)CC[NH+]1CCCCC1	15	2099	ESR1	NHR
1yin	1sj0	Yes	0.297518	0.567388	0.441176	O(c1ccccc1)CC[NH+]1CCCCC1	15	2099	ESR1	NHR
4iv2	4iw8		0.912469	0.851996	0.509804	FC(c1c2[nH][n]cc2ccc1)(F)F	13	2099	ESR1	NHR
4iw8	4iv2		1.17532	0.764383	0.509804	FC(c1c2[nH][n]cc2ccc1)(F)F	13	2099	ESR1	NHR
4iv4	4iw6		0.858232	1.41848	0.84	Oc1c(c2[n]([n]c3c2cccc3C(F)(F)F)C)cccc1	21	2099	ESR1	NHR
4iw6	4iv4		0.00524595	0.367677	0.84	Oc1c(c2[n]([n]c3c2cccc3C(F)(F)F)C)cccc1	21	2099	ESR1	NHR
1uom	1yin	Yes	0.783334	0.686682	0.447761	O(c1ccccc1)CC[NH+]1CCCCC1	15	2099	ESR1	NHR
1yin	1uom	Yes	0.00416448	1.40564	0.447761	O(c1ccccc1)CC[NH+]1CCCCC1	15	2099	ESR1	NHR
1xp1	1xp6	Yes	1.35358	5.12665	0.705882	Oc1ccc([C@@H]2Oc3c(S[C@@H]2c2ccc(O)cc2)cccc3)cc1	24	2099	ESR1	NHR
1xp6	1xp1	Yes	1.18469	10.3951	0.705882	Oc1ccc([C@@H]2Oc3c(S[C@@H]2c2ccc(O)cc2)cccc3)cc1	24	2099	ESR1	NHR
3l03	3q95	Yes	0.200241	0.227361	0.930233	C[C@]12[C@@H](C[C@H](C1)O)[C@H]1[C@H](CC2)c2c(CC1)cc(O)cc2	20	2099	ESR1	NHR
3q95	3l03	Yes	0.176189	0.297945	0.930233	C[C@]12[C@@H](C[C@H](C1)O)[C@H]1[C@H](CC2)c2c(CC1)cc(O)cc2	20	2099	ESR1	NHR
3osa	3os8		0.435375	0.779206	0.666667	C[n]1[n]c(c2c1cccc2)c1c(cc(cc1)O)O	18	2099	ESR1	NHR
3os8	3osa		0.479914	0.564185	0.666667	C[n]1[n]c(c2c1cccc2)c1c(cc(cc1)O)O	18	2099	ESR1	NHR
1sj0	1xp6	Yes	1.87583	0.72387	0.716418	Oc1ccc([C@@H]2Oc3c(S[C@@H]2c2ccc(O)cc2)cccc3)cc1	24	2099	ESR1	NHR
1xp6	1sj0	Yes	1.75372	4.67623	0.716418	Oc1ccc([C@@H]2Oc3c(S[C@@H]2c2ccc(O)cc2)cccc3)cc1	24	2099	ESR1	NHR
2z4b	2i0g	Yes	0.0146168	0.351656	0.954545	Oc1ccc([C@@H]2Oc3c([C@H]4[C@@H]2CCC4)cc(cc3)O)cc1	21	2100	ESR2	NHR
1u3q	1u3s		6.52082	0.825591	0.461538	o1[n]cc2c1cccc2	9	2100	ESR2	NHR
1u3s	1u3q	Yes	6.90705	0.33245	0.461538	o1[n]cc2c1cccc2	9	2100	ESR2	NHR
1u3s	2nv7	Yes	6.08201	0.885698	0.487805	c1c2c(ccc1)cccc2	10	2100	ESR2	NHR
2nv7	1u3s	Yes	6.82455	0.546887	0.487805	c1c2c(ccc1)cccc2	10	2100	ESR2	NHR
2jj3	2i0g	Yes	0.802237	0.885445	0.888889	Oc1ccc([C@@H]2Oc3c([C@H]4[C@@H]2CCC4)cccc3)cc1	20	2100	ESR2	NHR
2i0g	2jj3	Yes	0.0101676	0.445813	0.888889	Oc1ccc([C@@H]2Oc3c([C@H]4[C@@H]2CCC4)cccc3)cc1	20	2100	ESR2	NHR
3omo	3omp	Yes	0.6766	0.76077	0.705882	O=CN1CCc2c(C1)cccc2	12	2100	ESR2	NHR
3omp	3omo	Yes	0.00942462	2.26747	0.705882	O=CN1CCc2c(C1)cccc2	12	2100	ESR2	NHR
3omo	3omq	Yes	1.56516	1.58524	0.571429	N1CCc2c(C1)cccc2	10	2100	ESR2	NHR
3omq	3omo	Yes	0.836247	2.22313	0.571429	N1CCc2c(C1)cccc2	10	2100	ESR2	NHR
3omp	3omq	Yes	1.44457	2.47884	0.571429	N1CCc2c(C1)cccc2	10	2100	ESR2	NHR
3omq	3omp	Yes	1.6465	2.20684	0.571429	N1CCc2c(C1)cccc2	10	2100	ESR2	NHR
2jj3	2z4b	Yes	0.27612	0.438927	0.893617	Oc1ccc([C@@H]2Oc3c([C@H]4[C@@H]2CCC4)cc(cc3)O)cc1	21	2100	ESR2	NHR
2z4b	2jj3	Yes	0.224259	0.428175	0.893617	Oc1ccc([C@@H]2Oc3c([C@H]4[C@@H]2CCC4)cc(cc3)O)cc1	21	2100	ESR2	NHR
4bnh	4bnn	Yes	0.816391	1.16446	0.619048	Oc1ccc(CCCCCC)cc1	13	1123686	fabI	other enzyme
4bnn	4bnh	Yes	0.0145055	3.47118	0.619048	Oc1ccc(CCCCCC)cc1	13	1123686	fabI	other enzyme
4alk	4bnh	Yes	1.08832	1.01234	0.722222	O(c1ccccc1)c1ccccc1	13	1123686	fabI	other enzyme
4alk	4bng	Yes	0.272939	1.24563	0.914286	Oc1c(Oc2ccccc2)ccc(CC)c1	16	1123686	fabI	other enzyme
4bnk	4bnh	Yes	1.66156	5.38675	0.742857	O(c1ccccc1)c1ccccc1	13	1123686	fabI	other enzyme
4bnk	4bnf	Yes	0.280876	0.813125	0.8125	O(c1ccccc1)c1ccccc1	13	1123686	fabI	other enzyme
4bnn	4bnf	Yes	2.13115	3.73506	0.871795	Oc1cc(CCC)ccc1Oc1ccccc1	17	1123686	fabI	other enzyme
4bnl	4bnh	Yes	0.169382	1.5757	0.702703	O(c1ccccc1)c1ccccc1	13	1123686	fabI	other enzyme
4bnf	4bnh	Yes	0.013458	0.46523	0.702703	O(c1ccccc1)c1ccccc1	13	1123686	fabI	other enzyme
4bnl	4bng	Yes	0.528205	0.931574	0.722222	O(c1ccccc1)c1ccccc1	13	1123686	fabI	other enzyme
4bnk	4bng	Yes	0.286698	5.56369	0.764706	O(c1ccccc1)c1ccccc1	13	1123686	fabI	other enzyme
4bnf	4bng	Yes	0.519594	0.607163	0.722222	O(c1ccccc1)c1ccccc1	13	1123686	fabI	other enzyme
4bnn	4bng	Yes	0.614122	3.78149	0.390244	Oc1c(O)cccc1	8	1123686	fabI	other enzyme
4bng	4bnn	Yes	0.62523	0.481332	0.390244	Oc1c(O)cccc1	8	1123686	fabI	other enzyme
3rye	4h5d		1.42385		0.409091	O=P(CP(=O)([O-])[O-])([O-])[O-]	9	2224	FDPS	other
4kfa	4kpj	Yes	0.939417		0.689655	OC(P(=O)([O-])[O-])(P(=O)[O-])C	10	2224	FDPS	other
4kpj	4kfa		1.18024	5.68499	0.689655	OC(P(=O)([O-])[O-])(P(=O)[O-])C	10	2224	FDPS	other
1yq7	3rye	Yes	0.00650339		0.571429	OC(P(=O)([O-])[O-])(P(=O)[O-])C	10	2224	FDPS	other
4kqs	3n46	Yes	1.30914		0.606061	OC(P(=O)([O-])[O-])(P(=O)[O-])C	10	2224	FDPS	other
3n46	4kqs	Yes	0.00681909	8.34279	0.606061	OC(P(=O)([O-])[O-])(P(=O)[O-])C	10	2224	FDPS	other
4ga3	1zw5		4.29942		0.555556	OC(P(=O)([O-])[O-])(P(=O)[O-])C	10	2224	FDPS	other
4dem	2vf6	Yes	8.73937		0.391304	O=P(CP(=O)([O-])[O-])([O-])[O-]	9	2224	FDPS	other
2vf6	4dem	Yes	1.81486		0.391304	O=P(CP(=O)([O-])[O-])([O-])[O-]	9	2224	FDPS	other
4kpd	4h5d	Yes	0.00236394		0.418605	O=P(CP(=O)([O-])[O-])([O-])[O-]	9	2224	FDPS	other
4p0w	2vf6	Yes	0.933669	7.57777	0.555556	OC(P(=O)([O-])[O-])(P(=O)[O-])C	10	2224	FDPS	other
2vf6	4p0w	Yes	4.16239		0.555556	OC(P(=O)([O-])[O-])(P(=O)[O-])C	10	2224	FDPS	other
4kpj	2opm		1.18518	5.80915	0.645161	OC(P(=O)([O-])[O-])(P(=O)[O-])C	10	2224	FDPS	other
2opm	4kpj		1.89949		0.645161	OC(P(=O)([O-])[O-])(P(=O)[O-])C	10	2224	FDPS	other
2rah	2vf6	Yes	0.308671		0.461538	O=P(CP(=O)([O-])[O-])([O-])[O-]	9	2224	FDPS	other
4p0w	2qis	Yes	0.00283945	7.39991	0.606061	OC(P(=O)([O-])[O-])(P(=O)[O-])C	10	2224	FDPS	other
2qis	4p0w	Yes	3.34123		0.606061	OC(P(=O)([O-])[O-])(P(=O)[O-])C	10	2224	FDPS	other
2f8c	3rye	Yes	0.00422788		0.588235	OC(P(=O)([O-])[O-])(P(=O)[O-])C	10	2224	FDPS	other
3rye	2f8c		1.10003		0.588235	OC(P(=O)([O-])[O-])(P(=O)[O-])C	10	2224	FDPS	other
1yq7	4kq5	Yes	0.938277		0.606061	OC(P(=O)([O-])[O-])(P(=O)[O-])C	10	2224	FDPS	other
1yv5	2f9k	Yes	0.0263852		0.606061	OC(P(=O)([O-])[O-])(P(=O)[O-])C	10	2224	FDPS	other
1zw5	3rye	Yes	0.00407738		0.588235	OC(P(=O)([O-])[O-])(P(=O)[O-])C	10	2224	FDPS	other
3rye	1zw5		3.71415		0.588235	OC(P(=O)([O-])[O-])(P(=O)[O-])C	10	2224	FDPS	other
2vf6	4h5d	Yes	0.17452		0.391304	O=P(CP(=O)([O-])[O-])([O-])[O-]	9	2224	FDPS	other
4h5d	2vf6	Yes	8.73941		0.391304	O=P(CP(=O)([O-])[O-])([O-])[O-]	9	2224	FDPS	other
1zw5	4h5d	Yes	0.948979		0.428571	O=P(CP(=O)([O-])[O-])([O-])[O-]	9	2224	FDPS	other
4h5d	1zw5	Yes	6.91031		0.428571	O=P(CP(=O)([O-])[O-])([O-])[O-]	9	2224	FDPS	other
4kqs	3b7l	Yes	0.097654	8.08793	0.540541	OC(P(=O)([O-])[O-])(P(=O)[O-])C	10	2224	FDPS	other
3b7l	4kqs	Yes	0.869214		0.540541	OC(P(=O)([O-])[O-])(P(=O)[O-])C	10	2224	FDPS	other
4lfv	1zw5	Yes	6.91163		0.428571	O=P(CP(=O)([O-])[O-])([O-])[O-]	9	2224	FDPS	other
4ga3	4kfa		1.41039		0.555556	OC(P(=O)([O-])[O-])(P(=O)[O-])C	10	2224	FDPS	other
2qis	3rye	Yes	0.00261219		0.571429	OC(P(=O)([O-])[O-])(P(=O)[O-])C	10	2224	FDPS	other
3rye	2qis		0.626155		0.571429	OC(P(=O)([O-])[O-])(P(=O)[O-])C	10	2224	FDPS	other
4kpd	4kpj	Yes	0.0240025		0.666667	OC(P(=O)([O-])[O-])(P(=O)[O-])C	10	2224	FDPS	other
4kpj	4kpd		0.660238	5.9254	0.666667	OC(P(=O)([O-])[O-])(P(=O)[O-])C	10	2224	FDPS	other
4ga3	3b7l		6.45602		0.5	OC(P(=O)([O-])[O-])(P(=O)[O-])C	10	2224	FDPS	other
4ga3	4dem		0.290157		0.391304	O=P(CP(=O)([O-])[O-])([O-])[O-]	9	2224	FDPS	other
4kfa	4h5d	Yes	0.974998		0.428571	O=P(CP(=O)([O-])[O-])([O-])[O-]	9	2224	FDPS	other
[truncated: 6,785 more rows]

## Sheet: Supplementary_Table S2
Target	Candidate_Ligand	Reference_Ligand	MCS_Ratio	Covered?
PDE_E	Lig_E1	NA	NA	N
PDE_E	Lig_E2	NA	NA	N
PDE_E	Lig_E3	NA	NA	N
PDE_E	Lig_E4	NA	NA	N
PDE_E	Lig_E5	NA	NA	N
PDE_E	Lig_E6	NA	NA	N
PDE_E	Lig_E8	Xray_E3	0.842105	Y
PDE_E	Lig_E9	Xray_E33	0.8	Y
PDE_E	Lig_E10	Xray_E35	0.923077	Y
PDE_E	Lig_E11	Xray_E43	0.842105	Y
PDE_E	Lig_E12	Xray_E13	0.761905	Y
PDE_E	Lig_E13	Xray_E13	0.8	Y
PDE_E	Lig_E14	Xray_E30	0.809524	Y
PDE_E	Lig_E15	Xray_E13	0.780488	Y
PDE_E	Lig_E16	Xray_E13	0.727273	Y
PDE_E	Lig_E17	Xray_E13	0.727273	Y
PDE_E	Lig_E18	Xray_E13	0.744186	Y
PDE_E	Lig_E19	Xray_E13	0.842105	Y
PDE_E	Lig_E20	Xray_E13	0.744186	Y
PDE_E	Lig_E21	Xray_E13	0.820513	Y
PDE_E	Lig_E22	Xray_E13	0.789474	Y
PDE_E	Lig_E23	Xray_E13	0.8	Y
PDE_E	Lig_E24	Xray_E13	0.780488	Y
PDE_E	Lig_E25	Xray_E13	0.810811	Y
PDE_E	Lig_E26	NA	NA	N
PDE_E	Lig_E27	NA	NA	N
PDE_E	Lig_E28	Xray_E3	0.864865	Y
PDE_E	Lig_E29	Xray_E15	0.894737	Y
PDE_E	Lig_E30	Xray_E30	0.871795	Y
PDE_E	Lig_E31	Xray_E35	0.923077	Y
PDE_E	Lig_E32	Xray_E3	0.888889	Y
PDE_E	Lig_E33	Xray_E14	0.652174	Y
PDE_E	Lig_E34	Xray_E35	0.9	Y
PDE_E	Lig_E35	NA	NA	N
PDE_E	Lig_E36	Xray_E22	0.933333	Y
PDE_E	Lig_E37	NA	NA	N
PDE_E	Lig_E38	Xray_E9	0.666667	Y
PDE_E	Lig_E39	Xray_E13	0.769231	Y
PDE_E	Lig_E40	NA	NA	N
PDE_E	Lig_E41	NA	NA	N
PDE_E	Lig_E42	NA	NA	N
PDE_E	Lig_E43	NA	NA	N
PDE_E	Lig_E44	NA	NA	N
PDE_E	Lig_E45	Xray_E7	0.511628	Y
PDE_E	Lig_E46	NA	NA	N
PDE_E	Lig_E47	Xray_E16	0.792453	Y
PDE_E	Lig_E48	NA	NA	N
PDE_E	Lig_E49	Xray_E16	0.603774	Y
PDE_E	Lig_E50	Xray_E14	0.588235	Y
PDE_E	Lig_E51	Xray_E14	0.6	Y
PDE_E	Lig_E52	Xray_E14	0.6	Y
PDE_E	Lig_E53	Xray_E18	0.947368	Y
PDE_E	Lig_E54	Xray_E35	0.923077	Y
PDE_E	Lig_E55	Xray_E15	0.894737	Y
PDE_E	Lig_E56	Xray_E17	0.954545	Y
PDE_E	Lig_E57	NA	NA	N
PDE_E	Lig_E58	Xray_E14	0.612245	Y
PDE_E	Lig_E59	Xray_E13	0.697674	Y
PDE_E	Lig_E60	Xray_E16	0.862069	Y
PDE_E	Lig_E61	Xray_E16	0.736842	Y
PDE_E	Lig_E62	Xray_E16	0.736842	Y
PDE_E	Lig_E63	Xray_E13	0.727273	Y
PDE_E	Lig_E64	Xray_E16	0.877193	Y
PDE_E	Lig_E65	Xray_E16	0.777778	Y
PDE_E	Lig_E66	Xray_E16	0.777778	Y
PDE_E	Lig_E67	Xray_E16	0.806452	Y
PDE_E	Lig_E68	Xray_E13	0.666667	Y
PDE_E	Lig_E69	Xray_E31	0.681818	Y
PDE_E	Lig_E70	Xray_E16	0.763636	Y
PDE_E	Lig_E71	Xray_E16	0.763636	Y
PDE_E	Lig_E72	Xray_E13	0.680851	Y
PDE_E	Lig_E73	Xray_E17	0.913043	Y
PDE_E	Lig_E74	Xray_E13	0.711111	Y
PDE_E	Lig_E75	Xray_E13	0.711111	Y
PDE_E	Lig_E76	Xray_E13	0.680851	Y
PDE_E	Lig_E77	Xray_E16	0.688525	Y
PDE_E	Lig_E78	NA	NA	N
PDE_E	Lig_E79	NA	NA	N
PDE_E	Lig_E80	Xray_E20	0.510638	Y
PDE_E	Lig_E81	Xray_E13	0.695652	Y
PDE_E	Lig_E82	Xray_E13	0.761905	Y
PDE_E	Lig_E83	Xray_E14	0.6	Y
PDE_E	Lig_E84	Xray_E21	0.84	Y
PDE_E	Lig_E85	NA	NA	N
PDE_E	Lig_E86	NA	NA	N
PDE_E	Lig_E87	Xray_E13	0.652174	Y
PDE_E	Lig_E88	Xray_E22	0.830189	Y
PDE_E	Lig_E89	Xray_E13	0.780488	Y
PDE_E	Lig_E90	NA	NA	N
PDE_E	Lig_E91	Xray_E17	0.84	Y
PDE_E	Lig_E92	Xray_E17	0.893617	Y
PDE_E	Lig_E93	Xray_E18	0.965517	Y
PDE_E	Lig_E94	NA	NA	N
PDE_E	Lig_E95	Xray_E13	0.744186	Y
PDE_E	Lig_E97	Xray_E13	0.744186	Y
PDE_E	Lig_E98	Xray_E43	0.842105	Y
PDE_E	Lig_E99	Xray_E43	0.842105	Y
PDE_E	Lig_E100	Xray_E17	0.976744	Y
PDE_E	Lig_E101	Xray_E7	0.5	Y
PDE_E	Lig_E103	Xray_E13	0.666667	Y
PDE_E	Lig_E104	Xray_E7	0.869565	Y
PDE_E	Lig_E105	Xray_E17	0.954545	Y
PDE_E	Lig_E106	NA	NA	N
PDE_E	Lig_E107	Xray_E17	0.727273	Y
PDE_E	Lig_E108	Xray_E17	0.727273	Y
PDE_E	Lig_E109	Xray_E21	0.75	Y
PDE_E	Lig_E110	NA	NA	N
PDE_E	Lig_E111	Xray_E7	0.976744	Y
PDE_E	Lig_E112	Xray_E17	0.84	Y
PDE_E	Lig_E113	NA	NA	N
PDE_E	Lig_E114	Xray_E7	0.933333	Y
PDE_E	Lig_E115	Xray_E7	0.893617	Y
PDE_E	Lig_E116	Xray_E7	0.875	Y
PDE_E	Lig_E117	Xray_E6	0.702703	Y
PDE_E	Lig_E118	Xray_E13	0.820513	Y
PDE_E	Lig_E119	Xray_E16	0.736842	Y
PDE_E	Lig_E120	Xray_E17	0.807692	Y
PDE_E	Lig_E121	Xray_E13	0.727273	Y
PDE_E	Lig_E122	Xray_E17	0.893617	Y
PDE_E	Lig_E123	Xray_E7	0.823529	Y
PDE_E	Lig_E124	Xray_E7	0.933333	Y
PDE_E	Lig_E125	Xray_E16	0.75	Y
PDE_E	Lig_E126	Xray_E17	0.711111	Y
PDE_E	Lig_E127	Xray_E7	0.84	Y
PDE_E	Lig_E128	Xray_E17	0.744186	Y
PDE_E	Lig_E129	Xray_E17	0.8	Y
PDE_E	Lig_E130	Xray_E17	0.761905	Y
PDE_E	Lig_E131	Xray_E17	0.744186	Y
PDE_E	Lig_E132	NA	NA	N
PDE_E	Lig_E133	Xray_E7	0.875	Y
PDE_E	Lig_E134	Xray_E7	0.893617	Y
PDE_E	Lig_E135	Xray_E7	0.933333	Y
PDE_E	Lig_E136	Xray_E22	0.93617	Y
PDE_E	Lig_E137	Xray_E7	0.913043	Y
PDE_E	Lig_E138	Xray_E22	0.93617	Y
PDE_E	Lig_E139	Xray_E7	0.875	Y
PDE_E	Lig_E140	Xray_E7	0.893617	Y
PDE_E	Lig_E141	Xray_E22	0.897959	Y
PDE_E	Lig_E142	Xray_E7	0.510638	Y
PDE_E	Lig_E143	Xray_E7	0.521739	Y
PDE_E	Lig_E144	Xray_E17	0.666667	Y
PDE_E	Lig_E145	Xray_E17	0.933333	Y
PDE_E	Lig_E146	Xray_E7	0.533333	Y
PDE_E	Lig_E147	Xray_E17	0.727273	Y
PDE_E	Lig_E148	NA	NA	N
PDE_E	Lig_E149	Xray_E17	0.727273	Y
PDE_E	Lig_E150	Xray_E17	0.780488	Y
PDE_E	Lig_E151	Xray_E7	0.521739	Y
PDE_E	Lig_E152	Xray_E17	0.744186	Y
PDE_E	Lig_E153	Xray_E17	0.744186	Y
PDE_E	Lig_E154	Xray_E17	0.820513	Y
PDE_E	Lig_E155	Xray_E17	0.711111	Y
PDE_E	Lig_E156	Xray_E19	0.610169	Y
PDE_E	Lig_E157	Xray_E17	0.711111	Y
PDE_E	Lig_E158	Xray_E17	0.711111	Y
PDE_E	Lig_E159	Xray_E17	0.695652	Y
PDE_E	Lig_E160	Xray_E17	0.680851	Y
PDE_E	Lig_E161	NA	NA	N
PDE_E	Lig_E162	NA	NA	N
PDE_E	Lig_E163	NA	NA	N
PDE_E	Lig_E164	Xray_E6	0.787879	Y
PDE_E	Lig_E165	Xray_E6	0.764706	Y
PDE_E	Lig_E166	NA	NA	N
PDE_E	Lig_E167	Xray_E23	0.636364	Y
PDE_E	Lig_E168	Xray_E19	0.610169	Y
PDE_E	Lig_E170	NA	NA	N
PDE_E	Lig_E171	Xray_E24	0.904762	Y
PDE_E	Lig_E172	Xray_E23	0.636364	Y
PDE_E	Lig_E173	Xray_E22	0.897959	Y
PDE_E	Lig_E174	NA	NA	N
PDE_E	Lig_E175	Xray_E17	0.666667	Y
PDE_E	Lig_E176	Xray_E17	0.666667	Y
PDE_E	Lig_E177	Xray_E24	0.666667	Y
PDE_E	Lig_E178	NA	NA	N
PDE_E	Lig_E179	NA	NA	N
PDE_E	Lig_E180	Xray_E23	0.636364	Y
PDE_E	Lig_E181	NA	NA	N
PDE_E	Lig_E182	Xray_E1	0.734694	Y
PDE_E	Lig_E183	Xray_E23	0.681818	Y
PDE_E	Lig_E184	Xray_E25	0.785714	Y
PDE_E	Lig_E185	NA	NA	N
PDE_E	Lig_E186	Xray_E25	0.62069	Y
PDE_E	Lig_E187	Xray_E7	0.509804	Y
PDE_E	Lig_E188	NA	NA	N
PDE_E	Lig_E189	NA	NA	N
PDE_E	Lig_E190	Xray_E1	0.980392	Y
PDE_E	Lig_E191	Xray_E24	0.666667	Y
PDE_E	Lig_E192	Xray_E22	0.88	Y
PDE_E	Lig_E193	NA	NA	N
PDE_E	Lig_E194	Xray_E1	0.961538	Y
PDE_E	Lig_E195	Xray_E25	0.679245	Y
PDE_E	Lig_E196	Xray_E25	0.654545	Y
PDE_E	Lig_E197	Xray_E25	0.642857	Y
PDE_E	Lig_E198	Xray_E23	0.651163	Y
PDE_E	Lig_E199	NA	NA	N
PDE_E	Lig_E200	NA	NA	N
PDE_E	Lig_E201	Xray_E26	0.555556	Y
PDE_E	Lig_E202	Xray_E24	0.904762	Y
PDE_E	Lig_E203	Xray_E25	0.610169	Y
PDE_E	Lig_E204	NA	NA	N
PDE_E	Lig_E205	NA	NA	N
PDE_E	Lig_E206	Xray_E24	0.608696	Y
PDE_E	Lig_E207	NA	NA	N
PDE_E	Lig_E208	NA	NA	N
PDE_E	Lig_E209	Xray_E24	0.636364	Y
PDE_E	Lig_E210	Xray_E24	0.595745	Y
PDE_E	Lig_E211	Xray_E24	0.622222	Y
PDE_E	Lig_E212	Xray_E24	0.651163	Y
PDE_E	Lig_E213	NA	NA	N
PDE_E	Lig_E214	NA	NA	N
PDE_E	Lig_E215	Xray_E24	0.651163	Y
PDE_E	Lig_E216	Xray_E24	0.583333	Y
PDE_E	Lig_E217	NA	NA	N
PDE_E	Lig_E218	NA	NA	N
PDE_E	Lig_E219	NA	NA	N
PDE_E	Lig_E220	NA	NA	N
PDE_E	Lig_E221	NA	NA	N
PDE_E	Lig_E222	NA	NA	N
PDE_E	Lig_E223	Xray_E24	0.904762	Y
PDE_E	Lig_E224	NA	NA	N
PDE_E	Lig_E225	NA	NA	N
PDE_E	Lig_E226	NA	NA	N
PDE_E	Lig_E227	NA	NA	N
PDE_E	Lig_E228	NA	NA	N
PDE_E	Lig_E229	NA	NA	N
PDE_E	Lig_E230	NA	NA	N
PDE_E	Lig_E231	NA	NA	N
PDE_E	Lig_E232	NA	NA	N
PDE_E	Lig_E233	NA	NA	N
PDE_E	Lig_E234	NA	NA	N
PDE_E	Lig_E235	NA	NA	N
PDE_E	Lig_E236	NA	NA	N
PDE_E	Lig_E237	NA	NA	N
PDE_E	Lig_E238	Xray_E24	0.608696	Y
PDE_E	Lig_E239	NA	NA	N
PDE_E	Lig_E240	NA	NA	N
PDE_E	Lig_E241	NA	NA	N
PDE_E	Lig_E242	NA	NA	N
PDE_E	Lig_E243	NA	NA	N
PDE_E	Lig_E244	NA	NA	N
PDE_E	Lig_E245	NA	NA	N
PDE_E	Lig_E246	NA	NA	N
PDE_E	Lig_E247	NA	NA	N
PDE_E	Lig_E248	NA	NA	N
PDE_E	Lig_E249	NA	NA	N
PDE_E	Lig_E250	NA	NA	N
PDE_E	Lig_E251	NA	NA	N
PDE_E	Lig_E252	NA	NA	N
PDE_E	Lig_E253	NA	NA	N
PDE_E	Lig_E254	NA	NA	N
PDE_E	Lig_E255	NA	NA	N
PDE_E	Lig_E256	NA	NA	N
PDE_E	Lig_E257	NA	NA	N
PDE_E	Lig_E258	NA	NA	N
PDE_E	Lig_E259	Xray_E26	0.555556	Y
PDE_E	Lig_E260	NA	NA	N
PDE_E	Lig_E261	NA	NA	N
PDE_E	Lig_E262	NA	NA	N
PDE_E	Lig_E263	Xray_E26	0.555556	Y
PDE_E	Lig_E264	NA	NA	N
PDE_E	Lig_E265	NA	NA	N
PDE_E	Lig_E266	NA	NA	N
PDE_E	Lig_E267	NA	NA	N
PDE_E	Lig_E268	NA	NA	N
PDE_E	Lig_E269	NA	NA	N
PDE_E	Lig_E270	NA	NA	N
PDE_E	Lig_E271	NA	NA	N
PDE_E	Lig_E272	NA	NA	N
PDE_E	Lig_E273	NA	NA	N
PDE_E	Lig_E274	NA	NA	N
PDE_E	Lig_E275	NA	NA	N
PDE_E	Lig_E276	NA	NA	N
PDE_E	Lig_E277	NA	NA	N
PDE_E	Lig_E278	NA	NA	N
PDE_E	Lig_E279	NA	NA	N
PDE_E	Lig_E280	NA	NA	N
PDE_E	Lig_E281	NA	NA	N
PDE_E	Lig_E282	NA	NA	N
PDE_E	Lig_E283	NA	NA	N
PDE_E	Lig_E284	NA	NA	N
PDE_E	Lig_E285	NA	NA	N
PDE_E	Lig_E286	Xray_E37	0.6875	Y
PDE_E	Lig_E287	NA	NA	N
PDE_E	Lig_E288	NA	NA	N
PDE_E	Lig_E289	NA	NA	N
PDE_E	Lig_E290	Xray_E28	0.869565	Y
PDE_E	Lig_E291	NA	NA	N
PDE_E	Lig_E292	NA	NA	N
PDE_E	Lig_E293	Xray_E30	0.85	Y
PDE_E	Lig_E294	Xray_E30	0.85	Y
PDE_E	Lig_E295	NA	NA	N
PDE_E	Lig_E296	NA	NA	N
PDE_E	Lig_E297	NA	NA	N
PDE_E	Lig_E298	NA	NA	N
PDE_E	Lig_E299	NA	NA	N
PDE_E	Lig_E300	Xray_E29	0.769231	Y
PDE_E	Lig_E301	NA	NA	N
PDE_E	Lig_E302	Xray_E30	0.8	Y
PDE_E	Lig_E303	Xray_E30	0.829268	Y
PDE_E	Lig_E304	NA	NA	N
PDE_E	Lig_E305	Xray_E30	0.829268	Y
PDE_E	Lig_E306	NA	NA	N
PDE_E	Lig_E307	Xray_E65	0.863636	Y
PDE_E	Lig_E308	Xray_E46	0.857143	Y
PDE_E	Lig_E309	Xray_E30	0.820513	Y
PDE_E	Lig_E310	NA	NA	N
PDE_E	Lig_E311	NA	NA	N
PDE_E	Lig_E312	NA	NA	N
PDE_E	Lig_E313	NA	NA	N
PDE_E	Lig_E314	Xray_E31	0.909091	Y
PDE_E	Lig_E315	Xray_E30	0.790698	Y
PDE_E	Lig_E316	NA	NA	N
PDE_E	Lig_E317	NA	NA	N
PDE_E	Lig_E318	Xray_E31	0.882353	Y
PDE_E	Lig_E319	Xray_E33	0.904762	Y
PDE_E	Lig_E320	Xray_E30	0.744186	Y
PDE_E	Lig_E321	Xray_E35	0.878049	Y
PDE_E	Lig_E322	Xray_E30	0.790698	Y
PDE_E	Lig_E323	Xray_E59	0.789474	Y
PDE_E	Lig_E324	Xray_E59	0.810811	Y
PDE_E	Lig_E325	Xray_E17	0.627451	Y
PDE_E	Lig_E326	Xray_E35	0.9	Y
PDE_E	Lig_E327	Xray_E17	0.711111	Y
PDE_E	Lig_E328	Xray_E33	0.926829	Y
PDE_E	Lig_E329	Xray_E17	0.780488	Y
PDE_E	Lig_E330	Xray_E33	0.904762	Y
PDE_E	Lig_E331	Xray_E33	0.844444	Y
PDE_E	Lig_E332	Xray_E30	0.755556	Y
PDE_E	Lig_E333	Xray_E3	0.888889	Y
PDE_E	Lig_E334	Xray_E17	0.842105	Y
PDE_E	Lig_E335	Xray_E31	0.909091	Y
PDE_E	Lig_E336	Xray_E14	0.625	Y
PDE_E	Lig_E337	Xray_E30	0.820513	Y
PDE_E	Lig_E338	Xray_E30	0.772727	Y
PDE_E	Lig_E339	Xray_E30	0.727273	Y
PDE_E	Lig_E340	Xray_E30	0.772727	Y
PDE_E	Lig_E341	Xray_E17	0.680851	Y
PDE_E	Lig_E342	Xray_E17	0.64	Y
PDE_E	Lig_E343	Xray_E30	0.711111	Y
PDE_E	Lig_E344	Xray_E30	0.711111	Y
PDE_E	Lig_E345	Xray_E30	0.761905	Y
PDE_E	Lig_E346	Xray_E71	0.871795	Y
PDE_E	Lig_E347	Xray_E13	0.761905	Y
PDE_E	Lig_E348	Xray_E30	0.711111	Y
PDE_E	Lig_E349	NA	NA	N
PDE_E	Lig_E350	Xray_E31	0.882353	Y
PDE_E	Lig_E351	Xray_E35	0.857143	Y
PDE_E	Lig_E352	Xray_E13	0.727273	Y
PDE_E	Lig_E353	Xray_E3	0.864865	Y
PDE_E	Lig_E354	Xray_E3	0.864865	Y
PDE_E	Lig_E355	Xray_E30	0.829268	Y
PDE_E	Lig_E356	Xray_E30	0.695652	Y
PDE_E	Lig_E357	NA	NA	N
PDE_E	Lig_E358	Xray_E30	0.73913	Y
PDE_E	Lig_E359	Xray_E17	0.893617	Y
PDE_E	Lig_E360	Xray_E17	0.893617	Y
PDE_E	Lig_E361	Xray_E17	0.875	Y
PDE_E	Lig_E362	Xray_E17	0.875	Y
PDE_E	Lig_E363	NA	NA	N
PDE_E	Lig_E364	Xray_E17	0.761905	Y
PDE_E	Lig_E365	Xray_E17	0.823529	Y
PDE_E	Lig_E366	Xray_E17	0.823529	Y
PDE_E	Lig_E367	NA	NA	N
PDE_E	Lig_E368	NA	NA	N
PDE_E	Lig_E369	NA	NA	N
PDE_E	Lig_E370	Xray_E43	0.744186	Y
PDE_E	Lig_E371	Xray_E30	0.695652	Y
PDE_E	Lig_E372	Xray_E43	0.727273	Y
PDE_E	Lig_E373	Xray_E35	0.818182	Y
PDE_E	Lig_E374	NA	NA	N
PDE_E	Lig_E375	Xray_E30	0.85	Y
PDE_E	Lig_E376	Xray_E51	0.972973	Y
PDE_E	Lig_E377	Xray_E30	0.780488	Y
PDE_E	Lig_E378	NA	NA	N
PDE_E	Lig_E379	Xray_E30	0.723404	Y
PDE_E	Lig_E380	Xray_E30	0.727273	Y
PDE_E	Lig_E381	NA	NA	N
PDE_E	Lig_E382	Xray_E71	0.85	Y
PDE_E	Lig_E383	Xray_E30	0.73913	Y
PDE_E	Lig_E384	Xray_E30	0.829268	Y
PDE_E	Lig_E385	Xray_E14	0.625	Y
PDE_E	Lig_E386	Xray_E30	0.744186	Y
PDE_E	Lig_E387	Xray_E30	0.772727	Y
PDE_E	Lig_E388	Xray_E15	0.894737	Y
PDE_E	Lig_E389	Xray_E30	0.761905	Y
PDE_E	Lig_E390	Xray_E30	0.744186	Y
PDE_E	Lig_E391	Xray_E17	0.727273	Y
PDE_E	Lig_E392	Xray_E13	0.75	Y
PDE_E	Lig_E393	Xray_E30	0.744186	Y
PDE_E	Lig_E394	Xray_E31	0.833333	Y
PDE_E	Lig_E395	Xray_E31	0.833333	Y
PDE_E	Lig_E396	Xray_E13	0.681818	Y
PDE_E	Lig_E397	Xray_E30	0.711111	Y
PDE_E	Lig_E399	Xray_E43	0.711111	Y
PDE_E	Lig_E400	NA	NA	N
PDE_E	Lig_E401	Xray_E44	0.928571	Y
PDE_E	Lig_E402	Xray_E35	0.818182	Y
PDE_E	Lig_E403	Xray_E43	0.780488	Y
PDE_E	Lig_E404	Xray_E43	0.761905	Y
PDE_E	Lig_E405	NA	NA	N
PDE_E	Lig_E406	NA	NA	N
PDE_E	Lig_E407	Xray_E30	0.727273	Y
PDE_E	Lig_E408	Xray_E17	0.666667	Y
PDE_E	Lig_E409	Xray_E37	0.933333	Y
PDE_E	Lig_E410	Xray_E39	0.827586	Y
PDE_E	Lig_E411	Xray_E37	0.75	Y
PDE_E	Lig_E412	Xray_E30	0.727273	Y
PDE_E	Lig_E413	Xray_E30	0.711111	Y
PDE_E	Lig_E414	Xray_E30	0.727273	Y
PDE_E	Lig_E415	Xray_E30	0.727273	Y
PDE_E	Lig_E416	Xray_E31	0.789474	Y
PDE_E	Lig_E417	Xray_E31	0.857143	Y
PDE_E	Lig_E418	Xray_E17	0.744186	Y
PDE_E	Lig_E419	Xray_E17	0.761905	Y
PDE_E	Lig_E420	Xray_E14	0.652174	Y
PDE_E	Lig_E421	Xray_E37	0.875	Y
PDE_E	Lig_E422	Xray_E43	0.780488	Y
PDE_E	Lig_E423	Xray_E30	0.744186	Y
PDE_E	Lig_E424	Xray_E43	0.780488	Y
PDE_E	Lig_E425	NA	NA	N
PDE_E	Lig_E426	Xray_E37	0.8	Y
PDE_E	Lig_E427	Xray_E17	0.744186	Y
PDE_E	Lig_E428	Xray_E47	0.95	Y
PDE_E	Lig_E429	Xray_E30	0.727273	Y
PDE_E	Lig_E430	Xray_E30	0.809524	Y
PDE_E	Lig_E431	Xray_E30	0.727273	Y
PDE_E	Lig_E432	Xray_E30	0.695652	Y
PDE_E	Lig_E433	Xray_E17	0.680851	Y
PDE_E	Lig_E434	Xray_E17	0.680851	Y
PDE_E	Lig_E435	Xray_E49	0.918919	Y
PDE_E	Lig_E436	Xray_E49	0.894737	Y
PDE_E	Lig_E437	NA	NA	N
PDE_E	Lig_E438	NA	NA	N
PDE_E	Lig_E439	Xray_E13	0.731707	Y
PDE_E	Lig_E440	Xray_E30	0.85	Y
PDE_E	Lig_E441	Xray_E30	0.85	Y
PDE_E	Lig_E442	Xray_E31	0.789474	Y
PDE_E	Lig_E443	NA	NA	N
PDE_E	Lig_E444	NA	NA	N
PDE_E	Lig_E445	Xray_E30	0.727273	Y
PDE_E	Lig_E446	Xray_E30	0.727273	Y
PDE_E	Lig_E447	Xray_E17	0.727273	Y
PDE_E	Lig_E448	NA	NA	N
PDE_E	Lig_E449	Xray_E14	0.625	Y
PDE_E	Lig_E450	Xray_E13	0.714286	Y
PDE_E	Lig_E451	Xray_E43	0.761905	Y
PDE_E	Lig_E452	NA	NA	N
PDE_E	Lig_E455	NA	NA	N
PDE_E	Lig_E457	NA	NA	N
PDE_E	Lig_E458	Xray_E43	0.761905	Y
PDE_E	Lig_E459	Xray_E30	0.809524	Y
PDE_E	Lig_E460	Xray_E43	0.761905	Y
PDE_E	Lig_E461	Xray_E43	0.761905	Y
PDE_E	Lig_E462	Xray_E30	0.727273	Y
PDE_E	Lig_E463	Xray_E37	0.903226	Y
PDE_E	Lig_E464	NA	NA	N
PDE_E	Lig_E465	Xray_E14	0.681818	Y
PDE_E	Lig_E466	Xray_E33	0.842105	Y
PDE_E	Lig_E467	Xray_E30	0.744186	Y
PDE_E	Lig_E468	Xray_E17	0.8	Y
PDE_E	Lig_E469	Xray_E30	0.711111	Y
PDE_E	Lig_E470	Xray_E65	0.85	Y
PDE_E	Lig_E471	Xray_E37	0.875	Y
PDE_E	Lig_E472	Xray_E14	0.612245	Y
PDE_E	Lig_E473	Xray_E14	0.612245	Y
PDE_E	Lig_E474	Xray_E3	0.888889	Y
PDE_E	Lig_E475	NA	NA	N
PDE_E	Lig_E476	Xray_E30	0.727273	Y
PDE_E	Lig_E477	Xray_E30	0.711111	Y
PDE_E	Lig_E478	Xray_E17	0.727273	Y
PDE_E	Lig_E479	Xray_E3	0.914286	Y
PDE_E	Lig_E480	Xray_E43	0.761905	Y
PDE_E	Lig_E481	Xray_E30	0.711111	Y
PDE_E	Lig_E482	Xray_E30	0.695652	Y
PDE_E	Lig_E483	NA	NA	N
PDE_E	Lig_E484	Xray_E43	0.8	Y
PDE_E	Lig_E485	Xray_E30	0.727273	Y
PDE_E	Lig_E486	Xray_E14	0.612245	Y
PDE_E	Lig_E487	Xray_E17	0.727273	Y
PDE_E	Lig_E488	Xray_E30	0.744186	Y
PDE_E	Lig_E489	Xray_E43	0.744186	Y
PDE_E	Lig_E490	Xray_E30	0.727273	Y
PDE_E	Lig_E491	Xray_E30	0.744186	Y
PDE_E	Lig_E492	Xray_E14	0.535714	Y
PDE_E	Lig_E493	Xray_E14	0.681818	Y
PDE_E	Lig_E494	Xray_E17	0.744186	Y
PDE_E	Lig_E495	NA	NA	N
PDE_E	Lig_E496	Xray_E14	0.638298	Y
PDE_E	Lig_E497	Xray_E65	0.790698	Y
PDE_E	Lig_E498	Xray_E65	0.809524	Y
PDE_E	Lig_E499	Xray_E33	0.926829	Y
PDE_E	Lig_E500	NA	NA	N
PDE_E	Lig_E501	NA	NA	N
PDE_E	Lig_E502	Xray_E14	0.625	Y
PDE_E	Lig_E503	Xray_E17	0.727273	Y
PDE_E	Lig_E504	Xray_E17	0.8	Y
PDE_E	Lig_E505	Xray_E31	0.833333	Y
PDE_E	Lig_E506	Xray_E14	0.6	Y
PDE_E	Lig_E507	NA	NA	N
PDE_E	Lig_E508	Xray_E43	0.744186	Y
PDE_E	Lig_E509	Xray_E17	0.761905	Y
PDE_E	Lig_E510	Xray_E30	0.727273	Y
PDE_E	Lig_E511	Xray_E17	0.695652	Y
PDE_E	Lig_E512	Xray_E17	0.727273	Y
PDE_E	Lig_E513	Xray_E15	0.85	Y
PDE_E	Lig_E514	Xray_E43	0.761905	Y
PDE_E	Lig_E515	Xray_E14	0.612245	Y
PDE_E	Lig_E516	Xray_E31	0.833333	Y
PDE_E	Lig_E517	Xray_E51	0.820513	Y
PDE_E	Lig_E518	Xray_E51	0.820513	Y
PDE_E	Lig_E519	Xray_E31	0.810811	Y
PDE_E	Lig_E520	Xray_E15	0.918919	Y
PDE_E	Lig_E521	Xray_E3	0.769231	Y
PDE_E	Lig_E522	NA	NA	N
PDE_E	Lig_E523	Xray_E51	0.842105	Y
PDE_E	Lig_E524	Xray_E51	0.842105	Y
PDE_E	Lig_E525	Xray_E51	0.842105	Y
PDE_E	Lig_E526	Xray_E51	0.842105	Y
PDE_E	Lig_E527	Xray_E3	0.789474	Y
PDE_E	Lig_E528	Xray_E30	0.744186	Y
PDE_E	Lig_E529	Xray_E30	0.744186	Y
PDE_E	Lig_E530	Xray_E31	0.833333	Y
PDE_E	Lig_E531	NA	NA	N
PDE_E	Lig_E532	Xray_E30	0.727273	Y
PDE_E	Lig_E533	Xray_E30	0.711111	Y
PDE_E	Lig_E534	Xray_E30	0.695652	Y
PDE_E	Lig_E535	Xray_E3	0.789474	Y
PDE_E	Lig_E536	Xray_E30	0.829268	Y
PDE_E	Lig_E537	Xray_E3	0.789474	Y
PDE_E	Lig_E538	NA	NA	N
PDE_E	Lig_E539	Xray_E3	0.918919	Y
PDE_E	Lig_E540	Xray_E3	0.769231	Y
PDE_E	Lig_E541	Xray_E51	0.888889	Y
PDE_E	Lig_E542	Xray_E51	0.888889	Y
PDE_E	Lig_E543	Xray_E3	0.769231	Y
PDE_E	Lig_E544	NA	NA	N
PDE_E	Lig_E545	Xray_E17	0.744186	Y
PDE_E	Lig_E546	NA	NA	N
PDE_E	Lig_E547	Xray_E14	0.625	Y
PDE_E	Lig_E548	Xray_E31	0.810811	Y
PDE_E	Lig_E549	Xray_E31	0.769231	Y
PDE_E	Lig_E550	Xray_E14	0.588235	Y
PDE_E	Lig_E551	Xray_E14	0.6	Y
PDE_E	Lig_E552	Xray_E14	0.6	Y
PDE_E	Lig_E553	Xray_E3	0.810811	Y
PDE_E	Lig_E554	Xray_E59	0.697674	Y
PDE_E	Lig_E555	Xray_E14	0.666667	Y
PDE_E	Lig_E556	Xray_E30	0.761905	Y
PDE_E	Lig_E557	Xray_E59	0.714286	Y
PDE_E	Lig_E558	Xray_E39	0.727273	Y
PDE_E	Lig_E559	Xray_E15	0.85	Y
PDE_E	Lig_E560	NA	NA	N
PDE_E	Lig_E561	Xray_E58	0.888889	Y
PDE_E	Lig_E562	Xray_E30	0.829268	Y
PDE_E	Lig_E563	Xray_E65	0.772727	Y
PDE_E	Lig_E564	Xray_E17	0.695652	Y
PDE_E	Lig_E565	Xray_E17	0.680851	Y
PDE_E	Lig_E566	Xray_E17	0.666667	Y
PDE_E	Lig_E567	NA	NA	N
PDE_E	Lig_E568	Xray_E3	0.888889	Y
PDE_E	Lig_E569	Xray_E3	0.888889	Y
PDE_E	Lig_E570	Xray_E17	0.695652	Y
PDE_E	Lig_E571	Xray_E17	0.744186	Y
PDE_E	Lig_E572	Xray_E14	0.535714	Y
PDE_E	Lig_E573	Xray_E14	0.535714	Y
PDE_E	Lig_E574	Xray_E35	0.923077	Y
PDE_E	Lig_E575	Xray_E3	0.810811	Y
PDE_E	Lig_E576	NA	NA	N
PDE_E	Lig_E577	NA	NA	N
PDE_E	Lig_E578	NA	NA	N
PDE_E	Lig_E579	NA	NA	N
PDE_E	Lig_E580	Xray_E98	0.681818	Y
PDE_E	Lig_E581	Xray_E30	0.780488	Y
PDE_E	Lig_E582	Xray_E30	0.711111	Y
PDE_E	Lig_E583	Xray_E30	0.780488	Y
PDE_E	Lig_E584	Xray_E14	0.612245	Y
PDE_E	Lig_E585	Xray_E17	0.695652	Y
PDE_E	Lig_E586	Xray_E17	0.695652	Y
PDE_E	Lig_E587	Xray_E17	0.680851	Y
PDE_E	Lig_E588	Xray_E17	0.680851	Y
PDE_E	Lig_E589	Xray_E51	0.820513	Y
PDE_E	Lig_E590	Xray_E51	0.820513	Y
PDE_E	Lig_E591	Xray_E59	0.731707	Y
PDE_E	Lig_E592	Xray_E59	0.681818	Y
PDE_E	Lig_E593	Xray_E39	0.705882	Y
PDE_E	Lig_E594	Xray_E61	0.944444	Y
PDE_E	Lig_E595	Xray_E30	0.695652	Y
PDE_E	Lig_E596	Xray_E65	0.708333	Y
PDE_E	Lig_E597	Xray_E39	0.727273	Y
PDE_E	Lig_E598	Xray_E31	0.857143	Y
PDE_E	Lig_E599	Xray_E65	0.829268	Y
PDE_E	Lig_E600	NA	NA	N
PDE_E	Lig_E601	NA	NA	N
PDE_E	Lig_E602	Xray_E17	0.727273	Y
PDE_E	Lig_E604	Xray_E30	0.780488	Y
PDE_E	Lig_E605	Xray_E3	0.820513	Y
PDE_E	Lig_E606	Xray_E43	0.761905	Y
PDE_E	Lig_E607	Xray_E30	0.711111	Y
PDE_E	Lig_E608	Xray_E31	0.810811	Y
PDE_E	Lig_E609	Xray_E17	0.744186	Y
PDE_E	Lig_E610	Xray_E31	0.769231	Y
PDE_E	Lig_E611	Xray_E31	0.75	Y
PDE_E	Lig_E612	Xray_E80	0.651163	Y
PDE_E	Lig_E614	Xray_E51	0.820513	Y
PDE_E	Lig_E615	Xray_E14	0.666667	Y
PDE_E	Lig_E616	Xray_E80	0.608696	Y
PDE_E	Lig_E617	Xray_E15	0.918919	Y
PDE_E	Lig_E618	Xray_E15	0.918919	Y
PDE_E	Lig_E619	Xray_E14	0.638298	Y
PDE_E	Lig_E620	Xray_E30	0.695652	Y
PDE_E	Lig_E621	Xray_E65	0.909091	Y
PDE_E	Lig_E622	Xray_E51	0.842105	Y
PDE_E	Lig_E623	Xray_E51	0.842105	Y
PDE_E	Lig_E624	Xray_E80	0.636364	Y
PDE_E	Lig_E625	Xray_E59	0.697674	Y
PDE_E	Lig_E626	Xray_E14	0.612245	Y
PDE_E	Lig_E627	NA	NA	N
PDE_E	Lig_E628	Xray_E17	0.744186	Y
PDE_E	Lig_E629	Xray_E67	0.756757	Y
PDE_E	Lig_E630	Xray_E67	0.764706	Y
PDE_E	Lig_E631	Xray_E66	0.717949	Y
PDE_E	Lig_E632	Xray_E17	0.680851	Y
PDE_E	Lig_E633	Xray_E30	0.744186	Y
PDE_E	Lig_E634	Xray_E59	0.714286	Y
PDE_E	Lig_E635	Xray_E68	0.894737	Y
PDE_E	Lig_E636	Xray_E14	0.612245	Y
PDE_E	Lig_E637	Xray_E14	0.612245	Y
PDE_E	Lig_E638	Xray_E66	0.7	Y
PDE_E	Lig_E639	Xray_E39	0.8125	Y
PDE_E	Lig_E640	Xray_E39	0.727273	Y
PDE_E	Lig_E641	Xray_E30	0.829268	Y
PDE_E	Lig_E642	Xray_E66	0.7	Y
PDE_E	Lig_E643	Xray_E46	0.744186	Y
PDE_E	Lig_E644	Xray_E31	0.789474	Y
PDE_E	Lig_E645	Xray_E46	0.85	Y
PDE_E	Lig_E646	Xray_E80	0.651163	Y
PDE_E	Lig_E647	Xray_E80	0.636364	Y
PDE_E	Lig_E648	Xray_E39	0.787879	Y
PDE_E	Lig_E649	Xray_E51	0.972973	Y
PDE_E	Lig_E650	Xray_E51	0.972973	Y
PDE_E	Lig_E651	Xray_E51	0.972973	Y
PDE_E	Lig_E652	Xray_E51	0.972973	Y
PDE_E	Lig_E653	Xray_E43	0.744186	Y
PDE_E	Lig_E654	Xray_E30	0.711111	Y
PDE_E	Lig_E655	Xray_E30	0.711111	Y
PDE_E	Lig_E656	Xray_E30	0.680851	Y
PDE_E	Lig_E657	Xray_E30	0.711111	Y
PDE_E	Lig_E658	Xray_E31	0.857143	Y
PDE_E	Lig_E659	Xray_E31	0.769231	Y
PDE_E	Lig_E660	Xray_E31	0.857143	Y
PDE_E	Lig_E661	Xray_E14	0.638298	Y
PDE_E	Lig_E662	Xray_E30	0.695652	Y
PDE_E	Lig_E663	Xray_E17	0.711111	Y
PDE_E	Lig_E664	Xray_E44	0.896552	Y
PDE_E	Lig_E665	Xray_E17	0.695652	Y
PDE_E	Lig_E667	Xray_E30	0.727273	Y
PDE_E	Lig_E668	Xray_E17	0.711111	Y
PDE_E	Lig_E669	Xray_E43	0.761905	Y
PDE_E	Lig_E670	Xray_E43	0.820513	Y
PDE_E	Lig_E671	Xray_E39	0.8125	Y
PDE_E	Lig_E672	Xray_E59	0.731707	Y
PDE_E	Lig_E673	Xray_E59	0.714286	Y
PDE_E	Lig_E674	Xray_E30	0.863636	Y
PDE_E	Lig_E675	Xray_E14	0.638298	Y
PDE_E	Lig_E676	Xray_E17	0.727273	Y
PDE_E	Lig_E677	Xray_E17	0.744186	Y
PDE_E	Lig_E678	Xray_E59	0.714286	Y
PDE_E	Lig_E679	Xray_E43	0.8	Y
PDE_E	Lig_E680	Xray_E17	0.627451	Y
PDE_E	Lig_E681	Xray_E14	0.612245	Y
PDE_E	Lig_E682	Xray_E17	0.727273	Y
PDE_E	Lig_E683	Xray_E43	0.8	Y
PDE_E	Lig_E684	Xray_E49	0.842105	Y
PDE_E	Lig_E685	Xray_E49	0.820513	Y
PDE_E	Lig_E686	Xray_E59	0.769231	Y
PDE_E	Lig_E687	Xray_E59	0.714286	Y
PDE_E	Lig_E688	NA	NA	N
PDE_E	Lig_E689	Xray_E3	0.769231	Y
PDE_E	Lig_E690	Xray_E30	0.744186	Y
PDE_E	Lig_E691	Xray_E43	0.820513	Y
PDE_E	Lig_E692	Xray_E73	0.717949	Y
PDE_E	Lig_E693	Xray_E17	0.64	Y
PDE_E	Lig_E694	Xray_E17	0.695652	Y
PDE_E	Lig_E695	Xray_E14	0.638298	Y
PDE_E	Lig_E696	Xray_E17	0.64	Y
PDE_E	Lig_E697	Xray_E14	0.638298	Y
PDE_E	Lig_E698	Xray_E30	0.761905	Y
PDE_E	Lig_E699	Xray_E30	0.761905	Y
PDE_E	Lig_E700	Xray_E30	0.761905	Y
PDE_E	Lig_E701	Xray_E43	0.711111	Y
PDE_E	Lig_E702	NA	NA	N
PDE_E	Lig_E703	Xray_E66	0.631579	Y
PDE_E	Lig_E704	Xray_E97	0.742857	Y
PDE_E	Lig_E705	Xray_E66	0.777778	Y
PDE_E	Lig_E706	Xray_E66	0.615385	Y
PDE_E	Lig_E707	Xray_E17	0.666667	Y
PDE_E	Lig_E708	Xray_E14	0.681818	Y
PDE_E	Lig_E709	NA	NA	N
PDE_E	Lig_E710	Xray_E43	0.711111	Y
PDE_E	Lig_E711	Xray_E43	0.744186	Y
PDE_E	Lig_E712	Xray_E31	0.810811	Y
PDE_E	Lig_E713	NA	NA	N
PDE_E	Lig_E714	NA	NA	N
PDE_E	Lig_E715	NA	NA	N
PDE_E	Lig_E716	Xray_E80	0.636364	Y
PDE_E	Lig_E717	Xray_E80	0.636364	Y
PDE_E	Lig_E718	Xray_E43	0.680851	Y
PDE_E	Lig_E719	Xray_E3	0.75	Y
PDE_E	Lig_E720	Xray_E71	0.761905	Y
PDE_E	Lig_E721	Xray_E71	0.755556	Y
PDE_E	Lig_E722	Xray_E3	0.810811	Y
PDE_E	Lig_E723	Xray_E43	0.695652	Y
PDE_E	Lig_E724	Xray_E71	0.952381	Y
PDE_E	Lig_E725	Xray_E13	0.727273	Y
PDE_E	Lig_E726	Xray_E13	0.680851	Y
PDE_E	Lig_E727	Xray_E73	0.7	Y
PDE_E	Lig_E728	Xray_E58	0.914286	Y
PDE_E	Lig_E729	NA	NA	N
PDE_E	Lig_E730	Xray_E30	0.780488	Y
PDE_E	Lig_E731	Xray_E43	0.711111	Y
PDE_E	Lig_E732	Xray_E76	0.820513	Y
PDE_E	Lig_E733	Xray_E39	0.866667	Y
PDE_E	Lig_E734	Xray_E80	0.636364	Y
PDE_E	Lig_E735	Xray_E58	0.777778	Y
PDE_E	Lig_E736	Xray_E71	0.8	Y
PDE_E	Lig_E737	Xray_E43	0.744186	Y
PDE_E	Lig_E738	Xray_E43	0.744186	Y
PDE_E	Lig_E739	Xray_E43	0.744186	Y
PDE_E	Lig_E740	Xray_E17	0.711111	Y
PDE_E	Lig_E741	Xray_E17	0.695652	Y
PDE_E	Lig_E742	NA	NA	N
PDE_E	Lig_E743	NA	NA	N
PDE_E	Lig_E744	NA	NA	N
PDE_E	Lig_E745	NA	NA	N
PDE_E	Lig_E746	NA	NA	N
PDE_E	Lig_E747	NA	NA	N
PDE_E	Lig_E748	NA	NA	N
PDE_E	Lig_E749	Xray_E43	0.820513	Y
PDE_E	Lig_E750	Xray_E51	0.9	Y
PDE_E	Lig_E751	Xray_E51	0.9	Y
PDE_E	Lig_E752	Xray_E80	0.636364	Y
PDE_E	Lig_E753	Xray_E80	0.636364	Y
PDE_E	Lig_E754	Xray_E3	0.714286	Y
PDE_E	Lig_E755	Xray_E59	0.714286	Y
PDE_E	Lig_E756	NA	NA	N
PDE_E	Lig_E757	Xray_E13	0.727273	Y
PDE_E	Lig_E758	Xray_E17	0.695652	Y
PDE_E	Lig_E759	Xray_E43	0.8	Y
PDE_E	Lig_E760	NA	NA	N
PDE_E	Lig_E761	NA	NA	N
PDE_E	Lig_E762	NA	NA	N
PDE_E	Lig_E763	Xray_E30	0.829268	Y
PDE_E	Lig_E764	Xray_E17	0.695652	Y
PDE_E	Lig_E765	Xray_E68	0.73913	Y
PDE_E	Lig_E766	Xray_E72	0.95	Y
PDE_E	Lig_E767	Xray_E72	0.8	Y
PDE_E	Lig_E768	Xray_E13	0.780488	Y
PDE_E	Lig_E769	Xray_E13	0.780488	Y
PDE_E	Lig_E770	NA	NA	N
PDE_E	Lig_E771	Xray_E17	0.695652	Y
PDE_E	Lig_E772	Xray_E68	0.918919	Y
PDE_E	Lig_E773	NA	NA	N
PDE_E	Lig_E774	Xray_E59	0.714286	Y
PDE_E	Lig_E775	Xray_E17	0.695652	Y
PDE_E	Lig_E776	Xray_E71	0.790698	Y
PDE_E	Lig_E777	Xray_E71	0.790698	Y
PDE_E	Lig_E778	Xray_E66	0.736842	Y
PDE_E	Lig_E779	Xray_E13	0.727273	Y
PDE_E	Lig_E780	Xray_E43	0.744186	Y
PDE_E	Lig_E781	Xray_E43	0.711111	Y
PDE_E	Lig_E782	Xray_E17	0.933333	Y
PDE_E	Lig_E783	Xray_E35	0.9	Y
PDE_E	Lig_E784	Xray_E47	0.926829	Y
PDE_E	Lig_E785	Xray_E58	0.888889	Y
PDE_E	Lig_E786	Xray_E68	0.894737	Y
PDE_E	Lig_E787	Xray_E71	0.727273	Y
PDE_E	Lig_E788	Xray_E71	0.711111	Y
PDE_E	Lig_E789	Xray_E59	0.697674	Y
PDE_E	Lig_E790	Xray_E3	0.681818	Y
PDE_E	Lig_E791	Xray_E58	0.914286	Y
PDE_E	Lig_E792	Xray_E14	0.612245	Y
PDE_E	Lig_E793	Xray_E14	0.612245	Y
PDE_E	Lig_E794	NA	NA	N
PDE_E	Lig_E795	NA	NA	N
PDE_E	Lig_E796	Xray_E61	0.888889	Y
PDE_E	Lig_E797	Xray_E39	0.75	Y
PDE_E	Lig_E798	Xray_E43	0.8	Y
PDE_E	Lig_E799	Xray_E17	0.933333	Y
PDE_E	Lig_E800	Xray_E43	0.744186	Y
PDE_E	Lig_E801	Xray_E43	0.744186	Y
PDE_E	Lig_E802	Xray_E39	0.75	Y
PDE_E	Lig_E803	Xray_E71	0.790698	Y
PDE_E	Lig_E804	Xray_E71	0.755556	Y
PDE_E	Lig_E805	Xray_E30	0.780488	Y
PDE_E	Lig_E806	Xray_E71	0.790698	Y
PDE_E	Lig_E807	Xray_E14	0.625	Y
PDE_E	Lig_E808	NA	NA	N
PDE_E	Lig_E809	Xray_E74	0.8	Y
PDE_E	Lig_E810	NA	NA	N
PDE_E	Lig_E811	NA	NA	N
PDE_E	Lig_E812	Xray_E68	0.871795	Y
PDE_E	Lig_E813	NA	NA	N
PDE_E	Lig_E814	Xray_E13	0.711111	Y
PDE_E	Lig_E815	Xray_E30	0.790698	Y
PDE_E	Lig_E816	NA	NA	N
PDE_E	Lig_E817	Xray_E17	0.727273	Y
PDE_E	Lig_E818	Xray_E30	0.780488	Y
PDE_E	Lig_E819	Xray_E59	0.714286	Y
PDE_E	Lig_E820	Xray_E68	0.829268	Y
PDE_E	Lig_E821	NA	NA	N
PDE_E	Lig_E822	Xray_E17	0.727273	Y
PDE_E	Lig_E823	Xray_E68	0.809524	Y
PDE_E	Lig_E824	Xray_E30	0.761905	Y
PDE_E	Lig_E825	NA	NA	N
PDE_E	Lig_E826	Xray_E17	0.695652	Y
PDE_E	Lig_E827	Xray_E43	0.727273	Y
PDE_E	Lig_E828	Xray_E43	0.727273	Y
PDE_E	Lig_E829	Xray_E74	0.864865	Y
PDE_E	Lig_E830	Xray_E74	0.702703	Y
PDE_E	Lig_E831	Xray_E71	0.711111	Y
PDE_E	Lig_E832	NA	NA	N
PDE_E	Lig_E833	Xray_E17	0.727273	Y
PDE_E	Lig_E834	Xray_E17	0.744186	Y
PDE_E	Lig_E835	Xray_E74	0.619048	Y
PDE_E	Lig_E836	Xray_E75	0.8	Y
PDE_E	Lig_E837	Xray_E74	0.8	Y
PDE_E	Lig_E838	Xray_E43	0.780488	Y
PDE_E	Lig_E839	Xray_E66	0.7	Y
PDE_E	Lig_E840	NA	NA	N
PDE_E	Lig_E841	NA	NA	N
PDE_E	Lig_E842	Xray_E17	0.761905	Y
PDE_E	Lig_E843	Xray_E43	0.820513	Y
PDE_E	Lig_E844	Xray_E43	0.820513	Y
PDE_E	Lig_E845	NA	NA	N
PDE_E	Lig_E846	Xray_E65	0.930233	Y
PDE_E	Lig_E847	Xray_E43	0.744186	Y
PDE_E	Lig_E848	Xray_E43	0.761905	Y
PDE_E	Lig_E849	Xray_E17	0.780488	Y
PDE_E	Lig_E850	Xray_E73	0.717949	Y
PDE_E	Lig_E851	NA	NA	N
PDE_E	Lig_E852	Xray_E51	0.923077	Y
PDE_E	Lig_E853	Xray_E51	0.923077	Y
PDE_E	Lig_E854	NA	NA	N
PDE_E	Lig_E855	NA	NA	N
PDE_E	Lig_E856	NA	NA	N
PDE_E	Lig_E857	NA	NA	N
PDE_E	Lig_E858	NA	NA	N
PDE_E	Lig_E859	NA	NA	N
PDE_E	Lig_E860	NA	NA	N
PDE_E	Lig_E861	NA	NA	N
PDE_E	Lig_E862	Xray_E95	0.666667	Y
PDE_E	Lig_E863	Xray_E13	0.744186	Y
PDE_E	Lig_E864	Xray_E95	0.666667	Y
PDE_E	Lig_E865	Xray_E68	0.809524	Y
PDE_E	Lig_E866	Xray_E68	0.829268	Y
PDE_E	Lig_E867	NA	NA	N
PDE_E	Lig_E868	Xray_E80	0.844444	Y
PDE_E	Lig_E869	Xray_E80	0.844444	Y
PDE_E	Lig_E870	NA	NA	N
PDE_E	Lig_E871	Xray_E74	0.761905	Y
PDE_E	Lig_E872	Xray_E74	0.780488	Y
PDE_E	Lig_E873	Xray_E17	0.727273	Y
PDE_E	Lig_E874	Xray_E17	0.727273	Y
PDE_E	Lig_E875	NA	NA	N
PDE_E	Lig_E876	Xray_E39	0.787879	Y
PDE_E	Lig_E877	Xray_E66	0.631579	Y
PDE_E	Lig_E878	NA	NA	N
PDE_E	Lig_E879	Xray_E14	0.6	Y
PDE_E	Lig_E880	NA	NA	N
PDE_E	Lig_E881	NA	NA	N
PDE_E	Lig_E882	Xray_E13	0.727273	Y
PDE_E	Lig_E883	Xray_E76	0.684211	Y
PDE_E	Lig_E884	Xray_E80	0.636364	Y
PDE_E	Lig_E885	Xray_E73	0.7	Y
PDE_E	Lig_E886	Xray_E74	0.722222	Y
PDE_E	Lig_E887	Xray_E74	0.634146	Y
PDE_E	Lig_E888	Xray_E89	0.780488	Y
PDE_E	Lig_E889	Xray_E74	0.65	Y
PDE_E	Lig_E891	Xray_E74	0.842105	Y
PDE_E	Lig_E892	Xray_E74	0.65	Y
PDE_E	Lig_E893	NA	NA	N
PDE_E	Lig_E894	Xray_E17	0.761905	Y
PDE_E	Lig_E895	Xray_E68	0.871795	Y
PDE_E	Lig_E896	Xray_E68	0.871795	Y
PDE_E	Lig_E897	Xray_E80	0.636364	Y
PDE_E	Lig_E898	Xray_E80	0.636364	Y
PDE_E	Lig_E899	Xray_E74	0.744186	Y
PDE_E	Lig_E900	Xray_E80	0.622222	Y
PDE_E	Lig_E901	Xray_E74	0.619048	Y
PDE_E	Lig_E902	Xray_E97	0.684211	Y
PDE_E	Lig_E903	Xray_E97	0.65	Y
PDE_E	Lig_E904	Xray_E79	0.666667	Y
PDE_E	Lig_E905	Xray_E73	0.736842	Y
PDE_E	Lig_E906	Xray_E43	0.744186	Y
PDE_E	Lig_E907	Xray_E17	0.780488	Y
PDE_E	Lig_E908	Xray_E43	0.744186	Y
PDE_E	Lig_E909	NA	NA	N
PDE_E	Lig_E910	NA	NA	N
PDE_E	Lig_E911	Xray_E17	0.727273	Y
PDE_E	Lig_E912	Xray_E59	0.769231	Y
PDE_E	Lig_E913	NA	NA	N
PDE_E	Lig_E914	Xray_E80	0.636364	Y
PDE_E	Lig_E915	Xray_E80	0.636364	Y
PDE_E	Lig_E916	Xray_E80	0.958333	Y
PDE_E	Lig_E917	Xray_E17	0.727273	Y
PDE_E	Lig_E918	Xray_E17	0.727273	Y
PDE_E	Lig_E919	Xray_E66	0.717949	Y
PDE_E	Lig_E920	Xray_E97	0.684211	Y
PDE_E	Lig_E921	Xray_E97	0.666667	Y
PDE_E	Lig_E922	Xray_E74	0.65	Y
PDE_E	Lig_E923	Xray_E74	0.666667	Y
PDE_E	Lig_E924	Xray_E66	0.7	Y
PDE_E	Lig_E925	Xray_E73	0.717949	Y
PDE_E	Lig_E926	Xray_E72	0.894737	Y
PDE_E	Lig_E927	Xray_E37	0.8	Y
PDE_E	Lig_E928	NA	NA	N
PDE_E	Lig_E929	NA	NA	N
PDE_E	Lig_E930	Xray_E80	0.622222	Y
PDE_E	Lig_E931	Xray_E80	0.636364	Y
PDE_E	Lig_E932	Xray_E80	0.636364	Y
PDE_E	Lig_E933	Xray_E74	0.666667	Y
PDE_E	Lig_E934	Xray_E74	0.634146	Y
PDE_E	Lig_E935	Xray_E74	0.604651	Y
PDE_E	Lig_E936	Xray_E74	0.65	Y
PDE_E	Lig_E937	Xray_E80	0.636364	Y
PDE_E	Lig_E938	Xray_E80	0.636364	Y
PDE_E	Lig_E939	Xray_E80	0.636364	Y
PDE_E	Lig_E940	Xray_E80	0.636364	Y
PDE_E	Lig_E941	Xray_E68	0.809524	Y
PDE_E	Lig_E942	Xray_E92	0.952381	Y
PDE_E	Lig_E943	Xray_E84	0.9	Y
PDE_E	Lig_E944	Xray_E84	0.923077	Y
PDE_E	Lig_E945	NA	NA	N
PDE_E	Lig_E946	NA	NA	N
PDE_E	Lig_E947	NA	NA	N
PDE_E	Lig_E948	Xray_E94	0.727273	Y
PDE_E	Lig_E949	Xray_E93	0.731707	Y
PDE_E	Lig_E950	Xray_E94	0.727273	Y
PDE_E	Lig_E951	Xray_E17	0.727273	Y
PDE_E	Lig_E952	NA	NA	N
PDE_E	Lig_E953	Xray_E97	0.604651	Y
PDE_E	Lig_E954	Xray_E79	0.666667	Y
PDE_E	Lig_E955	NA	NA	N
PDE_E	Lig_E956	NA	NA	N
PDE_E	Lig_E957	Xray_E68	0.809524	Y
PDE_E	Lig_E958	NA	NA	N
PDE_E	Lig_E959	Xray_E100	0.682927	Y
PDE_E	Lig_E960	NA	NA	N
PDE_E	Lig_E961	Xray_E80	0.622222	Y
PDE_E	Lig_E962	Xray_E74	0.634146	Y
PDE_E	Lig_E963	NA	NA	N
PDE_E	Lig_E964	Xray_E84	0.8	Y
PDE_E	Lig_E965	Xray_E86	0.954545	Y
PDE_E	Lig_E966	Xray_E86	0.933333	Y
PDE_E	Lig_E967	Xray_E86	0.913043	Y
PDE_E	Lig_E968	Xray_E101	0.571429	Y
PDE_E	Lig_E969	Xray_E31	0.810811	Y
PDE_E	Lig_E970	Xray_E14	0.638298	Y
PDE_E	Lig_E971	Xray_E31	0.857143	Y
PDE_E	Lig_E972	Xray_E97	0.634146	Y
PDE_E	Lig_E973	Xray_E73	0.585366	Y
PDE_E	Lig_E974	Xray_E17	0.711111	Y
PDE_E	Lig_E975	Xray_E84	0.878049	Y
PDE_E	Lig_E976	Xray_E39	0.787879	Y
PDE_E	Lig_E977	Xray_E76	0.820513	Y
PDE_E	Lig_E978	Xray_E76	0.684211	Y
PDE_E	Lig_E979	Xray_E86	0.933333	Y
PDE_E	Lig_E980	Xray_E86	0.913043	Y
PDE_E	Lig_E981	Xray_E87	0.958333	Y
PDE_E	Lig_E982	Xray_E73	0.682927	Y
PDE_E	Lig_E983	Xray_E86	0.893617	Y
PDE_E	Lig_E984	Xray_E39	0.787879	Y
PDE_E	Lig_E985	NA	NA	N
PDE_E	Lig_E986	NA	NA	N
PDE_E	Lig_E987	NA	NA	N
PDE_E	Lig_E988	NA	NA	N
PDE_E	Lig_E989	Xray_E100	0.634146	Y
PDE_E	Lig_E990	Xray_E30	0.744186	Y
PDE_E	Lig_E991	Xray_E30	0.744186	Y
PDE_E	Lig_E992	NA	NA	N
PDE_E	Lig_E993	NA	NA	N
PDE_E	Lig_E994	Xray_E74	0.65	Y
PDE_E	Lig_E995	Xray_E89	0.761905	Y
PDE_E	Lig_E996	NA	NA	N
PDE_E	Lig_E997	NA	NA	N
PDE_E	Lig_E998	Xray_E73	0.615385	Y
PDE_E	Lig_E999	Xray_E73	0.666667	Y
PDE_E	Lig_E1000	Xray_E73	0.777778	Y
PDE_E	Lig_E1001	Xray_E13	0.744186	Y
PDE_E	Lig_E1002	Xray_E66	0.777778	Y
PDE_E	Lig_E1003	NA	NA	N
PDE_E	Lig_E1004	Xray_E101	0.571429	Y
PDE_E	Lig_E1005	Xray_E66	0.682927	Y
PDE_E	Lig_E1006	Xray_E84	0.780488	Y
PDE_E	Lig_E1007	Xray_E92	0.930233	Y
PDE_E	Lig_E1008	Xray_E97	0.904762	Y
PDE_E	Lig_E1009	Xray_E95	0.756757	Y
PDE_E	Lig_E1010	Xray_E73	0.585366	Y
PDE_E	Lig_E1011	Xray_E73	0.682927	Y
PDE_E	Lig_E1012	Xray_E84	0.829268	Y
PDE_E	Lig_E1013	Xray_E92	0.930233	Y
PDE_E	Lig_E1014	Xray_E39	0.787879	Y
PDE_E	Lig_E1015	Xray_E17	0.744186	Y
PDE_E	Lig_E1016	NA	NA	N
PDE_E	Lig_E1017	NA	NA	N
PDE_E	Lig_E1018	Xray_E68	0.809524	Y
PDE_E	Lig_E1019	Xray_E90	0.515152	Y
PDE_E	Lig_E1020	Xray_E68	0.809524	Y
PDE_E	Lig_E1021	Xray_E66	0.56	Y
PDE_E	Lig_E1022	Xray_E66	0.682927	Y
PDE_E	Lig_E1023	Xray_E84	0.744186	Y
PDE_E	Lig_E1024	Xray_E86	0.875	Y
PDE_E	Lig_E1025	Xray_E84	0.727273	Y
PDE_E	Lig_E1026	Xray_E84	0.744186	Y
PDE_E	Lig_E1027	Xray_E84	0.761905	Y
PDE_E	Lig_E1028	Xray_E74	0.619048	Y
PDE_E	Lig_E1029	Xray_E74	0.744186	Y
PDE_E	Lig_E1030	Xray_E74	0.604651	Y
PDE_E	Lig_E1031	NA	NA	N
PDE_E	Lig_E1032	NA	NA	N
PDE_E	Lig_E1033	Xray_E91	0.933333	Y
PDE_E	Lig_E1035	Xray_E91	0.978723	Y
PDE_E	Lig_E1036	Xray_E76	0.85	Y
PDE_E	Lig_E1037	Xray_E101	0.571429	Y
PDE_E	Lig_E1038	Xray_E101	0.571429	Y
PDE_E	Lig_E1039	Xray_E87	0.77551	Y
PDE_E	Lig_E1040	Xray_E86	0.765957	Y
PDE_E	Lig_E1041	Xray_E86	0.75	Y
PDE_E	Lig_E1042	Xray_E86	0.913043	Y
PDE_E	Lig_E1043	Xray_E86	0.893617	Y
PDE_E	Lig_E1044	Xray_E87	0.938776	Y
PDE_E	Lig_E1045	Xray_E86	0.875	Y
PDE_E	Lig_E1046	Xray_E87	0.791667	Y
PDE_E	Lig_E1047	Xray_E95	0.622222	Y
PDE_E	Lig_E1048	Xray_E99	0.744186	Y
PDE_E	Lig_E1049	Xray_E99	0.744186	Y
PDE_E	Lig_E1050	Xray_E17	0.695652	Y
PDE_E	Lig_E1051	Xray_E89	0.744186	Y
PDE_E	Lig_E1052	Xray_E73	0.682927	Y
PDE_E	Lig_E1053	Xray_E86	0.695652	Y
PDE_E	Lig_E1054	Xray_E86	0.695652	Y
PDE_E	Lig_E1055	Xray_E73	0.7	Y
PDE_E	Lig_E1056	Xray_E86	0.711111	Y
PDE_E	Lig_E1057	Xray_E73	0.545455	Y
PDE_E	Lig_E1058	Xray_E66	0.682927	Y
PDE_E	Lig_E1059	Xray_E87	0.77551	Y
PDE_E	Lig_E1060	NA	NA	N
PDE_E	Lig_E1061	Xray_E66	0.7	Y
PDE_E	Lig_E1062	Xray_E73	0.6	Y
PDE_E	Lig_E1063	Xray_E73	0.7	Y
PDE_E	Lig_E1064	Xray_E73	0.585366	Y
PDE_E	Lig_E1065	NA	NA	N
PDE_E	Lig_E1066	Xray_E65	0.790698	Y
PDE_E	Lig_E1067	Xray_E65	0.790698	Y
PDE_E	Lig_E1068	Xray_E17	0.711111	Y
PDE_E	Lig_E1069	Xray_E58	0.777778	Y
PDE_E	Lig_E1070	Xray_E74	0.619048	Y
PDE_E	Lig_E1071	Xray_E74	0.634146	Y
PDE_E	Lig_E1072	Xray_E92	0.818182	Y
PDE_E	Lig_E1073	Xray_E102	0.809524	Y
PDE_E	Lig_E1074	Xray_E92	0.909091	Y
PDE_E	Lig_E1075	Xray_E102	0.809524	Y
PDE_E	Lig_E1076	Xray_E84	0.790698	Y
PDE_E	Lig_E1077	Xray_E102	0.952381	Y
PDE_E	Lig_E1078	Xray_E66	0.651163	Y
PDE_E	Lig_E1079	Xray_E66	0.666667	Y
PDE_E	Lig_E1080	Xray_E92	0.888889	Y
PDE_E	Lig_E1081	NA	NA	N
PDE_E	Lig_E1082	Xray_E92	0.833333	Y
PDE_E	Lig_E1083	Xray_E76	0.837209	Y
PDE_E	Lig_E1084	Xray_E76	0.8	Y
PDE_E	Lig_E1085	Xray_E17	0.727273	Y
PDE_E	Lig_E1086	Xray_E89	0.744186	Y
PDE_E	Lig_E1087	Xray_E74	0.634146	Y
PDE_E	Lig_E1088	Xray_E39	0.764706	Y
PDE_E	Lig_E1089	Xray_E74	0.837209	Y
PDE_E	Lig_E1090	Xray_E74	0.634146	Y
PDE_E	Lig_E1091	Xray_E74	0.634146	Y
PDE_E	Lig_E1092	Xray_E74	0.634146	Y
PDE_E	Lig_E1093	Xray_E74	0.666667	Y
PDE_E	Lig_E1094	Xray_E17	0.711111	Y
PDE_E	Lig_E1095	Xray_E66	0.608696	Y
PDE_E	Lig_E1096	Xray_E86	0.823529	Y
PDE_E	Lig_E1097	Xray_E63	0.684211	Y
PDE_E	Lig_E1098	Xray_E74	0.619048	Y
PDE_E	Lig_E1099	Xray_E68	0.809524	Y
PDE_E	Lig_E1100	Xray_E68	0.809524	Y
PDE_E	Lig_E1101	Xray_E74	0.619048	Y
PDE_E	Lig_E1102	Xray_E110	0.622222	Y
PDE_E	Lig_E1103	Xray_E110	0.622222	Y
PDE_E	Lig_E1104	Xray_E92	0.782609	Y
PDE_E	Lig_E1105	Xray_E94	0.958333	Y
PDE_E	Lig_E1106	Xray_E92	0.8	Y
PDE_E	Lig_E1107	Xray_E102	0.904762	Y
PDE_E	Lig_E1108	Xray_E92	0.765957	Y
PDE_E	Lig_E1109	Xray_E86	0.913043	Y
PDE_E	Lig_E1110	Xray_E68	0.809524	Y
PDE_E	Lig_E1111	Xray_E68	0.809524	Y
PDE_E	Lig_E1112	NA	NA	N
PDE_E	Lig_E1113	Xray_E97	0.65	Y
PDE_E	Lig_E1114	Xray_E101	0.571429	Y
PDE_E	Lig_E1115	Xray_E92	0.782609	Y
PDE_E	Lig_E1116	Xray_E92	0.782609	Y
PDE_E	Lig_E1117	Xray_E92	0.888889	Y
PDE_E	Lig_E1118	Xray_E92	0.837209	Y
PDE_E	Lig_E1119	Xray_E17	0.695652	Y
PDE_E	Lig_E1120	Xray_E17	0.695652	Y
PDE_E	Lig_E1121	NA	NA	N
PDE_E	Lig_E1122	Xray_E17	0.711111	Y
PDE_E	Lig_E1123	Xray_E73	0.651163	Y
PDE_E	Lig_E1124	Xray_E101	0.545455	Y
PDE_E	Lig_E1125	NA	NA	N
PDE_E	Lig_E1126	Xray_E66	0.651163	Y
PDE_E	Lig_E1127	Xray_E39	0.787879	Y
PDE_E	Lig_E1128	Xray_E39	0.787879	Y
PDE_E	Lig_E1129	Xray_E39	0.787879	Y
PDE_E	Lig_E1130	Xray_E73	0.883721	Y
PDE_E	Lig_E1131	Xray_E74	0.634146	Y
PDE_E	Lig_E1132	NA	NA	N
PDE_E	Lig_E1133	Xray_E74	0.634146	Y
PDE_E	Lig_E1134	Xray_E74	0.634146	Y
PDE_E	Lig_E1135	Xray_E17	0.727273	Y
PDE_E	Lig_E1136	Xray_E17	0.761905	Y
PDE_E	Lig_E1137	Xray_E17	0.711111	Y
PDE_E	Lig_E1138	Xray_E92	0.888889	Y
PDE_E	Lig_E1139	Xray_E92	0.909091	Y
PDE_E	Lig_E1140	Xray_E95	0.636364	Y
PDE_E	Lig_E1141	NA	NA	N
PDE_E	Lig_E1142	Xray_E68	0.871795	Y
PDE_E	Lig_E1143	Xray_E74	0.666667	Y
PDE_E	Lig_E1144	Xray_E66	0.666667	Y
PDE_E	Lig_E1145	Xray_E68	0.829268	Y
PDE_E	Lig_E1146	NA	NA	N
PDE_E	Lig_E1147	Xray_E101	0.533333	Y
PDE_E	Lig_E1148	Xray_E101	0.533333	Y
PDE_E	Lig_E1149	Xray_E74	0.634146	Y
PDE_E	Lig_E1150	Xray_E68	0.894737	Y
PDE_E	Lig_E1151	Xray_E74	0.619048	Y
PDE_E	Lig_E1152	NA	NA	N
PDE_E	Lig_E1153	NA	NA	N
PDE_E	Lig_E1154	Xray_E74	0.619048	Y
PDE_E	Lig_E1155	Xray_E63	0.742857	Y
PDE_E	Lig_E1156	Xray_E17	0.727273	Y
PDE_E	Lig_E1157	Xray_E17	0.695652	Y
PDE_E	Lig_E1158	Xray_E73	0.682927	Y
PDE_E	Lig_E1159	Xray_E59	0.697674	Y
PDE_E	Lig_E1160	NA	NA	N
PDE_E	Lig_E1161	NA	NA	N
PDE_E	Lig_E1162	NA	NA	N
PDE_E	Lig_E1163	NA	NA	N
PDE_E	Lig_E1164	Xray_E66	0.666667	Y
PDE_E	Lig_E1165	Xray_E92	0.8	Y
PDE_E	Lig_E1166	Xray_E92	0.818182	Y
PDE_E	Lig_E1167	NA	NA	N
PDE_E	Lig_E1168	Xray_E68	0.809524	Y
PDE_E	Lig_E1169	Xray_E74	0.604651	Y
PDE_E	Lig_E1170	Xray_E102	0.904762	Y
PDE_E	Lig_E1171	Xray_E102	0.904762	Y
PDE_E	Lig_E1172	Xray_E74	0.634146	Y
PDE_E	Lig_E1173	Xray_E97	0.619048	Y
PDE_E	Lig_E1174	Xray_E74	0.590909	Y
PDE_E	Lig_E1175	Xray_E74	0.619048	Y
PDE_E	Lig_E1176	Xray_E101	0.510638	Y
PDE_E	Lig_E1177	Xray_E101	0.510638	Y
PDE_E	Lig_E1178	Xray_E101	0.510638	Y
PDE_E	Lig_E1179	Xray_E101	0.510638	Y
PDE_E	Lig_E1180	Xray_E101	0.909091	Y
PDE_E	Lig_E1181	Xray_E63	0.789474	Y
PDE_E	Lig_E1182	Xray_E101	0.571429	Y
PDE_E	Lig_E1183	Xray_E98	0.956522	Y
PDE_E	Lig_E1184	Xray_E68	0.755556	Y
PDE_E	Lig_E1185	Xray_E98	0.956522	Y
PDE_E	Lig_E1186	NA	NA	N
PDE_E	Lig_E1187	Xray_E99	0.772727	Y
PDE_E	Lig_E1188	Xray_E99	0.772727	Y
PDE_E	Lig_E1189	Xray_E68	0.772727	Y
PDE_E	Lig_E1190	Xray_E39	0.705882	Y
PDE_E	Lig_E1191	Xray_E39	0.705882	Y
PDE_E	Lig_E1192	Xray_E13	0.695652	Y
PDE_E	Lig_E1193	Xray_E63	0.764706	Y
PDE_E	Lig_E1194	Xray_E37	0.8	Y
PDE_E	Lig_E1195	Xray_E101	0.545455	Y
PDE_E	Lig_E1196	Xray_E101	0.545455	Y
PDE_E	Lig_E1197	Xray_E37	0.8	Y
PDE_E	Lig_E1198	Xray_E101	0.533333	Y
PDE_E	Lig_E1199	Xray_E17	0.711111	Y
PDE_E	Lig_E1200	Xray_E101	0.533333	Y
PDE_E	Lig_E1201	Xray_E37	0.756757	Y
PDE_E	Lig_E1202	Xray_E101	0.545455	Y
PDE_E	Lig_E1203	Xray_E92	0.888889	Y
PDE_E	Lig_E1204	Xray_E66	0.651163	Y
PDE_E	Lig_E1205	NA	NA	N
PDE_E	Lig_E1206	Xray_E68	0.85	Y
PDE_E	Lig_E1207	Xray_E97	0.619048	Y
PDE_E	Lig_E1208	Xray_E97	0.619048	Y
PDE_E	Lig_E1209	Xray_E73	0.666667	Y
PDE_E	Lig_E1210	Xray_E60	0.604651	Y
PDE_E	Lig_E1211	Xray_E63	0.764706	Y
PDE_E	Lig_E1212	Xray_E73	0.926829	Y
PDE_E	Lig_E1213	Xray_E101	0.55814	Y
PDE_E	Lig_E1214	Xray_E102	0.883721	Y
PDE_E	Lig_E1215	Xray_E92	0.844444	Y
PDE_E	Lig_E1216	Xray_E97	0.604651	Y
PDE_E	Lig_E1217	Xray_E39	0.742857	Y
PDE_E	Lig_E1218	Xray_E74	0.604651	Y
PDE_E	Lig_E1219	Xray_E63	0.857143	Y
PDE_E	Lig_E1220	Xray_E100	0.619048	Y
PDE_E	Lig_E1221	Xray_E37	0.8	Y
PDE_E	Lig_E1222	Xray_E101	0.909091	Y
PDE_E	Lig_E1223	Xray_E101	0.909091	Y
PDE_E	Lig_E1224	Xray_E73	0.666667	Y
PDE_E	Lig_E1225	Xray_E66	0.666667	Y
PDE_E	Lig_E1226	NA	NA	N
PDE_E	Lig_E1227	Xray_E37	0.8	Y
PDE_E	Lig_E1228	NA	NA	N
PDE_E	Lig_E1229	Xray_E73	0.682927	Y
PDE_E	Lig_E1230	Xray_E74	0.590909	Y
PDE_E	Lig_E1231	Xray_E74	0.727273	Y
PDE_E	Lig_E1232	Xray_E102	0.904762	Y
PDE_E	Lig_E1233	Xray_E92	0.888889	Y
PDE_E	Lig_E1234	Xray_E92	0.888889	Y
PDE_E	Lig_E1235	NA	NA	N
PDE_E	Lig_E1236	Xray_E76	0.65	Y
PDE_E	Lig_E1237	Xray_E37	0.8	Y
PDE_E	Lig_E1238	Xray_E37	0.8	Y
PDE_E	Lig_E1239	Xray_E17	0.680851	Y
PDE_E	Lig_E1240	Xray_E13	0.695652	Y
PDE_E	Lig_E1241	Xray_E17	0.680851	Y
PDE_E	Lig_E1242	Xray_E63	0.742857	Y
PDE_E	Lig_E1243	NA	NA	N
PDE_E	Lig_E1244	NA	NA	N
PDE_E	Lig_E1245	Xray_E98	0.977778	Y
PDE_E	Lig_E1246	NA	NA	N
PDE_E	Lig_E1247	NA	NA	N
PDE_E	Lig_E1248	Xray_E96	0.9	Y
PDE_E	Lig_E1249	NA	NA	N
PDE_E	Lig_E1250	NA	NA	N
PDE_E	Lig_E1251	NA	NA	N
PDE_E	Lig_E1252	Xray_E96	0.923077	Y
PDE_E	Lig_E1253	NA	NA	N
PDE_E	Lig_E1254	Xray_E102	0.883721	Y
PDE_E	Lig_E1255	NA	NA	N
PDE_E	Lig_E1256	Xray_E101	0.533333	Y
PDE_E	Lig_E1257	Xray_E101	0.533333	Y
PDE_E	Lig_E1258	Xray_E101	0.545455	Y
PDE_E	Lig_E1259	Xray_E101	0.545455	Y
PDE_E	Lig_E1260	Xray_E97	0.604651	Y
PDE_E	Lig_E1261	Xray_E97	0.604651	Y
PDE_E	Lig_E1262	Xray_E39	0.742857	Y
PDE_E	Lig_E1263	Xray_E74	0.604651	Y
PDE_E	Lig_E1264	Xray_E74	0.590909	Y
PDE_E	Lig_E1265	Xray_E59	0.638298	Y
PDE_E	Lig_E1266	Xray_E74	0.604651	Y
PDE_E	Lig_E1267	Xray_E74	0.604651	Y
PDE_E	Lig_E1268	Xray_E97	0.634146	Y
PDE_E	Lig_E1269	Xray_E63	0.764706	Y
PDE_E	Lig_E1270	Xray_E102	0.904762	Y
PDE_E	Lig_E1271	Xray_E102	0.904762	Y
PDE_E	Lig_E1272	Xray_E81	0.926829	Y
PDE_E	Lig_E1273	Xray_E81	0.926829	Y
PDE_E	Lig_E1274	Xray_E59	0.652174	Y
PDE_E	Lig_E1275	Xray_E39	0.764706	Y
PDE_E	Lig_E1276	Xray_E59	0.638298	Y
PDE_E	Lig_E1277	Xray_E59	0.625	Y
PDE_E	Lig_E1278	Xray_E59	0.6	Y
PDE_E	Lig_E1279	Xray_E63	0.634146	Y
PDE_E	Lig_E1280	NA	NA	N
PDE_E	Lig_E1281	NA	NA	N
PDE_E	Lig_E1282	Xray_E63	0.634146	Y
PDE_E	Lig_E1283	Xray_E63	0.764706	Y
PDE_E	Lig_E1284	Xray_E99	0.727273	Y
PDE_E	Lig_E1285	Xray_E92	0.869565	Y
PDE_E	Lig_E1286	NA	NA	N
PDE_E	Lig_E1287	Xray_E17	0.727273	Y
PDE_E	Lig_E1288	Xray_E74	0.634146	Y
PDE_E	Lig_E1289	Xray_E59	0.681818	Y
PDE_E	Lig_E1290	Xray_E97	0.590909	Y
PDE_E	Lig_E1291	Xray_E97	0.590909	Y
PDE_E	Lig_E1292	Xray_E97	0.604651	Y
PDE_E	Lig_E1293	Xray_E101	0.521739	Y
PDE_E	Lig_E1294	Xray_E101	0.521739	Y
PDE_E	Lig_E1295	Xray_E63	0.833333	Y
PDE_E	Lig_E1296	Xray_E73	0.666667	Y
PDE_E	Lig_E1297	Xray_E92	0.952381	Y
PDE_E	Lig_E1298	Xray_E68	0.790698	Y
PDE_E	Lig_E1299	Xray_E66	0.666667	Y
PDE_E	Lig_E1300	Xray_E74	0.619048	Y
PDE_E	Lig_E1301	Xray_E59	0.697674	Y
PDE_E	Lig_E1302	Xray_E74	0.590909	Y
PDE_E	Lig_E1303	NA	NA	N
PDE_E	Lig_E1304	Xray_E63	0.666667	Y
PDE_E	Lig_E1305	Xray_E63	0.685714	Y
PDE_E	Lig_E1306	Xray_E100	0.590909	Y
PDE_E	Lig_E1307	Xray_E68	0.790698	Y
PDE_E	Lig_E1308	Xray_E63	0.787879	Y
PDE_E	Lig_E1309	Xray_E63	0.722222	Y
PDE_E	Lig_E1310	Xray_E101	0.521739	Y
PDE_E	Lig_E1311	Xray_E59	0.638298	Y
PDE_E	Lig_E1312	Xray_E59	0.697674	Y
PDE_E	Lig_E1313	Xray_E73	0.636364	Y
PDE_E	Lig_E1314	Xray_E101	0.521739	Y
PDE_E	Lig_E1315	Xray_E101	0.521739	Y
PDE_E	Lig_E1316	Xray_E73	0.682927	Y
PDE_E	Lig_E1317	Xray_E73	0.682927	Y
PDE_E	Lig_E1318	Xray_E73	0.651163	Y
PDE_E	Lig_E1319	Xray_E101	0.545455	Y
PDE_E	Lig_E1320	Xray_E101	0.571429	Y
PDE_E	Lig_E1321	Xray_E74	0.619048	Y
PDE_E	Lig_E1322	Xray_E92	0.818182	Y
PDE_E	Lig_E1323	Xray_E74	0.604651	Y
PDE_E	Lig_E1324	Xray_E74	0.619048	Y
PDE_E	Lig_E1325	Xray_E74	0.590909	Y
PDE_E	Lig_E1326	Xray_E68	0.790698	Y
PDE_E	Lig_E1327	Xray_E39	0.764706	Y
PDE_E	Lig_E1328	Xray_E101	0.909091	Y
PDE_E	Lig_E1329	Xray_E63	0.702703	Y
PDE_E	Lig_E1330	Xray_E63	0.787879	Y
PDE_E	Lig_E1331	Xray_E68	0.790698	Y
PDE_E	Lig_E1332	Xray_E68	0.790698	Y
PDE_E	Lig_E1333	Xray_E59	0.638298	Y
PDE_E	Lig_E1334	Xray_E59	0.638298	Y
PDE_E	Lig_E1335	Xray_E59	0.697674	Y
PDE_E	Lig_E1336	Xray_E59	0.625	Y
PDE_E	Lig_E1337	Xray_E59	0.625	Y
PDE_E	Lig_E1338	Xray_E97	0.65	Y
PDE_E	Lig_E1339	Xray_E66	0.7	Y
PDE_E	Lig_E1340	NA	NA	N
PDE_E	Lig_E1341	NA	NA	N
PDE_E	Lig_E1342	Xray_E101	0.533333	Y
PDE_E	Lig_E1343	Xray_E101	0.533333	Y
PDE_E	Lig_E1344	Xray_E17	0.727273	Y
PDE_E	Lig_E1345	Xray_E63	0.764706	Y
PDE_E	Lig_E1346	Xray_E60	0.6	Y
PDE_E	Lig_E1347	Xray_E68	0.772727	Y
PDE_E	Lig_E1348	Xray_E59	0.638298	Y
PDE_E	Lig_E1349	Xray_E59	0.638298	Y
PDE_E	Lig_E1350	Xray_E74	0.604651	Y
PDE_E	Lig_E1351	NA	NA	N
PDE_E	Lig_E1352	Xray_E63	0.722222	Y
PDE_E	Lig_E1353	Xray_E39	0.75	Y
PDE_E	Lig_E1354	Xray_E100	0.604651	Y
PDE_E	Lig_E1355	Xray_E100	0.619048	Y
PDE_E	Lig_E1356	NA	NA	N
PDE_E	Lig_E1357	Xray_E59	0.638298	Y
PDE_E	Lig_E1358	Xray_E81	0.8	Y
PDE_E	Lig_E1359	Xray_E68	0.772727	Y
PDE_E	Lig_E1360	Xray_E101	0.930233	Y
PDE_E	Lig_E1361	Xray_E59	0.697674	Y
PDE_E	Lig_E1362	Xray_E63	0.8125	Y
PDE_E	Lig_E1363	Xray_E101	0.533333	Y
PDE_E	Lig_E1364	Xray_E101	0.533333	Y
PDE_E	Lig_E1365	Xray_E101	0.545455	Y
PDE_E	Lig_E1366	Xray_E101	0.545455	Y
PDE_E	Lig_E1367	NA	NA	N
PDE_E	Lig_E1368	Xray_E68	0.790698	Y
PDE_E	Lig_E1369	Xray_E63	0.787879	Y
PDE_E	Lig_E1370	Xray_E63	0.787879	Y
PDE_E	Lig_E1371	Xray_E63	0.764706	Y
PDE_E	Lig_E1372	Xray_E39	0.764706	Y
PDE_E	Lig_E1373	Xray_E63	0.684211	Y
PDE_E	Lig_E1374	Xray_E68	0.809524	Y
PDE_E	Lig_E1375	Xray_E37	0.777778	Y
PDE_E	Lig_E1376	Xray_E63	0.742857	Y
PDE_E	Lig_E1377	Xray_E43	0.761905	Y
PDE_E	Lig_E1378	Xray_E63	0.742857	Y
PDE_E	Lig_E1379	Xray_E59	0.638298	Y
PDE_E	Lig_E1380	Xray_E59	0.625	Y
PDE_E	Lig_E1381	Xray_E59	0.6	Y
PDE_E	Lig_E1382	Xray_E92	0.869565	Y
PDE_E	Lig_E1383	Xray_E59	0.681818	Y
PDE_E	Lig_E1384	Xray_E59	0.681818	Y
PDE_E	Lig_E1385	Xray_E59	0.638298	Y
PDE_E	Lig_E1386	Xray_E59	0.638298	Y
PDE_E	Lig_E1387	Xray_E59	0.638298	Y
PDE_E	Lig_E1388	Xray_E59	0.638298	Y
PDE_E	Lig_E1389	Xray_E59	0.638298	Y
PDE_E	Lig_E1390	Xray_E59	0.697674	Y
PDE_E	Lig_E1391	Xray_E59	0.638298	Y
PDE_E	Lig_E1392	Xray_E59	0.625	Y
PDE_E	Lig_E1393	Xray_E59	0.638298	Y
PDE_E	Lig_E1394	Xray_E101	0.521739	Y
PDE_E	Lig_E1395	Xray_E101	0.545455	Y
PDE_E	Lig_E1396	Xray_E60	0.634146	Y
PDE_E	Lig_E1397	Xray_E60	0.634146	Y
PDE_E	Lig_E1398	Xray_E63	0.764706	Y
PDE_E	Lig_E1399	Xray_E63	0.742857	Y
PDE_E	Lig_E1400	Xray_E37	0.8	Y
PDE_E	Lig_E1401	Xray_E39	0.764706	Y
PDE_E	Lig_E1402	Xray_E39	0.764706	Y
PDE_E	Lig_E1403	Xray_E39	0.727273	Y
PDE_E	Lig_E1404	Xray_E39	0.727273	Y
PDE_E	Lig_E1405	Xray_E39	0.722222	Y
PDE_E	Lig_E1406	Xray_E101	0.510638	Y
PDE_E	Lig_E1407	Xray_E59	0.625	Y
PDE_E	Lig_E1408	Xray_E59	0.612245	Y
PDE_E	Lig_E1409	Xray_E59	0.625	Y
PDE_E	Lig_E1410	Xray_E59	0.697674	Y
PDE_E	Lig_E1411	Xray_E73	0.926829	Y
PDE_E	Lig_E1412	Xray_E73	0.571429	Y
PDE_E	Lig_E1413	Xray_E68	0.772727	Y
PDE_E	Lig_E1414	Xray_E68	0.772727	Y
PDE_E	Lig_E1415	Xray_E59	0.681818	Y
PDE_E	Lig_E1416	Xray_E59	0.681818	Y
PDE_E	Lig_E1417	NA	NA	N
PDE_E	Lig_E1418	Xray_E73	0.585366	Y
PDE_E	Lig_E1419	Xray_E84	0.829268	Y
PDE_E	Lig_E1420	Xray_E97	0.634146	Y
PDE_E	Lig_E1421	Xray_E66	0.682927	Y
PDE_E	Lig_E1422	Xray_E100	0.682927	Y
PDE_E	Lig_E1423	Xray_E37	0.756757	Y
PDE_E	Lig_E1424	Xray_E37	0.756757	Y
PDE_E	Lig_E1425	Xray_E39	0.742857	Y
PDE_E	Lig_E1426	Xray_E81	0.820513	Y
PDE_E	Lig_E1427	Xray_E92	0.851064	Y
PDE_E	Lig_E1428	Xray_E92	0.869565	Y
PDE_E	Lig_E1429	NA	NA	N
PDE_E	Lig_E1430	Xray_E59	0.612245	Y
PDE_E	Lig_E1431	Xray_E59	0.652174	Y
PDE_E	Lig_E1432	Xray_E59	0.666667	Y
PDE_E	Lig_E1433	Xray_E101	0.533333	Y
PDE_E	Lig_E1434	Xray_E66	0.622222	Y
PDE_E	Lig_E1435	Xray_E63	0.764706	Y
PDE_E	Lig_E1436	Xray_E37	0.777778	Y
PDE_E	Lig_E1437	Xray_E59	0.638298	Y
PDE_E	Lig_E1438	Xray_E59	0.666667	Y
PDE_E	Lig_E1439	Xray_E59	0.652174	Y
PDE_E	Lig_E1440	NA	NA	N
PDE_E	Lig_E1441	Xray_E73	0.829268	Y
PDE_E	Lig_E1442	Xray_E92	0.888889	Y
PDE_E	Lig_E1443	Xray_E13	0.711111	Y
PDE_E	Lig_E1444	Xray_E43	0.727273	Y
PDE_E	Lig_E1445	Xray_E43	0.727273	Y
PDE_E	Lig_E1446	NA	NA	N
PDE_E	Lig_E1447	NA	NA	N
PDE_E	Lig_E1448	Xray_E74	0.727273	Y
PDE_E	Lig_E1449	Xray_E63	0.702703	Y
PDE_E	Lig_E1450	Xray_E59	0.625	Y
PDE_E	Lig_E1451	Xray_E59	0.638298	Y
PDE_E	Lig_E1452	Xray_E59	0.625	Y
PDE_E	Lig_E1453	Xray_E59	0.612245	Y
PDE_E	Lig_E1454	Xray_E59	0.612245	Y
PDE_E	Lig_E1455	Xray_E31	0.810811	Y
PDE_E	Lig_E1456	Xray_E31	0.810811	Y
PDE_E	Lig_E1457	Xray_E101	0.55814	Y
PDE_E	Lig_E1458	Xray_E101	0.55814	Y
PDE_E	Lig_E1459	Xray_E68	0.755556	Y
PDE_E	Lig_E1460	Xray_E101	0.545455	Y
PDE_E	Lig_E1461	Xray_E101	0.545455	Y
PDE_E	Lig_E1462	Xray_E59	0.681818	Y
PDE_E	Lig_E1463	Xray_E100	0.682927	Y
PDE_E	Lig_E1464	Xray_E59	0.681818	Y
PDE_E	Lig_E1465	Xray_E59	0.697674	Y
PDE_E	Lig_E1466	Xray_E101	0.545455	Y
PDE_E	Lig_E1467	Xray_E101	0.533333	Y
PDE_E	Lig_E1468	Xray_E101	0.521739	Y
PDE_E	Lig_E1469	Xray_E101	0.533333	Y
PDE_E	Lig_E1470	Xray_E92	0.851064	Y
PDE_E	Lig_E1471	Xray_E100	0.904762	Y
PDE_E	Lig_E1472	Xray_E100	0.904762	Y
PDE_E	Lig_E1473	Xray_E101	0.55814	Y
PDE_E	Lig_E1474	Xray_E101	0.55814	Y
PDE_E	Lig_E1475	Xray_E101	0.55814	Y
PDE_E	Lig_E1476	Xray_E101	0.55814	Y
PDE_E	Lig_E1477	Xray_E97	0.634146	Y
PDE_E	Lig_E1478	Xray_E97	0.634146	Y
PDE_E	Lig_E1479	Xray_E92	0.888889	Y
PDE_E	Lig_E1480	Xray_E63	0.764706	Y
PDE_E	Lig_E1481	Xray_E39	0.742857	Y
PDE_E	Lig_E1482	Xray_E63	0.634146	Y
PDE_E	Lig_E1483	Xray_E101	0.55814	Y
PDE_E	Lig_E1484	Xray_E101	0.55814	Y
PDE_E	Lig_E1485	Xray_E81	0.9	Y
PDE_E	Lig_E1486	Xray_E63	0.742857	Y
PDE_E	Lig_E1487	Xray_E63	0.742857	Y
PDE_E	Lig_E1488	Xray_E81	0.9	Y
PDE_E	Lig_E1489	Xray_E92	0.851064	Y
PDE_E	Lig_E1490	NA	NA	N
PDE_E	Lig_E1491	Xray_E3	0.666667	Y
PDE_E	Lig_E1492	Xray_E39	0.702703	Y
PDE_E	Lig_E1493	Xray_E68	0.790698	Y
PDE_E	Lig_E1494	Xray_E68	0.790698	Y
PDE_E	Lig_E1495	Xray_E59	0.681818	Y
PDE_E	Lig_E1496	Xray_E3	0.731707	Y
PDE_E	Lig_E1497	Xray_E37	0.777778	Y
PDE_E	Lig_E1498	Xray_E3	0.75	Y
PDE_E	Lig_E1499	Xray_E74	0.744186	Y
PDE_E	Lig_E1500	Xray_E74	0.619048	Y
PDE_E	Lig_E1501	Xray_E74	0.565217	Y
PDE_E	Lig_E1502	Xray_E73	0.682927	Y
PDE_E	Lig_E1503	Xray_E74	0.744186	Y
PDE_E	Lig_E1504	Xray_E37	0.777778	Y
PDE_E	Lig_E1505	Xray_E39	0.727273	Y
PDE_E	Lig_E1506	Xray_E39	0.727273	Y
PDE_E	Lig_E1507	Xray_E63	0.764706	Y
PDE_E	Lig_E1508	Xray_E3	0.769231	Y
PDE_E	Lig_E1509	NA	NA	N
PDE_E	Lig_E1510	NA	NA	N
PDE_E	Lig_E1511	NA	NA	N
PDE_E	Lig_E1512	Xray_E92	0.869565	Y
PDE_E	Lig_E1513	Xray_E3	0.666667	Y
PDE_E	Lig_E1514	Xray_E3	0.714286	Y
PDE_E	Lig_E1515	Xray_E3	0.731707	Y
PDE_E	Lig_E1516	NA	NA	N
PDE_E	Lig_E1517	Xray_E3	0.714286	Y
PDE_E	Lig_E1518	Xray_E73	0.666667	Y
PDE_E	Lig_E1519	Xray_E73	0.651163	Y
PDE_E	Lig_E1520	NA	NA	N
PDE_E	Lig_E1521	NA	NA	N
PDE_E	Lig_E1522	Xray_E59	0.625	Y
PDE_E	Lig_E1523	Xray_E108	0.933333	Y
PDE_E	Lig_E1524	Xray_E74	0.590909	Y
PDE_E	Lig_E1525	Xray_E43	0.727273	Y
PDE_E	Lig_E1526	NA	NA	N
PDE_E	Lig_E1527	Xray_E73	0.682927	Y
PDE_E	Lig_E1529	Xray_E92	0.869565	Y
PDE_E	Lig_E1530	Xray_E37	0.777778	Y
PDE_E	Lig_E1531	Xray_E106	0.96	Y
PDE_E	Lig_E1532	Xray_E106	0.96	Y
PDE_E	Lig_E1533	Xray_E37	0.777778	Y
PDE_E	Lig_E1534	NA	NA	N
PDE_E	Lig_E1535	NA	NA	N
PDE_E	Lig_E1536	Xray_E37	0.756757	Y
PDE_E	Lig_E1537	Xray_E73	0.666667	Y
PDE_E	Lig_E1538	Xray_E74	0.590909	Y
PDE_E	Lig_E1539	Xray_E37	0.682927	Y
PDE_E	Lig_E1540	Xray_E39	0.787879	Y
PDE_E	Lig_E1541	Xray_E74	0.680851	Y
PDE_E	Lig_E1542	Xray_E74	0.619048	Y
PDE_E	Lig_E1543	NA	NA	N
PDE_E	Lig_E1544	NA	NA	N
PDE_E	Lig_E1545	NA	NA	N
PDE_E	Lig_E1546	NA	NA	N
PDE_E	Lig_E1547	Xray_E73	0.682927	Y
PDE_E	Lig_E1548	Xray_E74	0.65	Y
PDE_E	Lig_E1549	Xray_E74	0.619048	Y
PDE_E	Lig_E1550	Xray_E73	0.666667	Y
PDE_E	Lig_E1551	Xray_E73	0.666667	Y
PDE_E	Lig_E1552	Xray_E106	0.979592	Y
PDE_E	Lig_E1553	Xray_E92	0.869565	Y
PDE_E	Lig_E1554	Xray_E74	0.604651	Y
PDE_E	Lig_E1555	NA	NA	N
PDE_E	Lig_E1556	Xray_E37	0.736842	Y
PDE_E	Lig_E1557	Xray_E37	0.736842	Y
PDE_E	Lig_E1558	Xray_E37	0.777778	Y
PDE_E	Lig_E1559	Xray_E37	0.756757	Y
PDE_E	Lig_E1560	Xray_E37	0.682927	Y
PDE_E	Lig_E1561	Xray_E37	0.777778	Y
PDE_E	Lig_E1562	Xray_E37	0.777778	Y
PDE_E	Lig_E1563	Xray_E73	0.682927	Y
PDE_E	Lig_E1564	Xray_E37	0.777778	Y
PDE_E	Lig_E1565	Xray_E73	0.651163	Y
PDE_E	Lig_E1566	NA	NA	N
PDE_E	Lig_E1567	Xray_E37	0.717949	Y
PDE_E	Lig_E1568	Xray_E101	0.533333	Y
PDE_E	Lig_E1569	Xray_E37	0.736842	Y
PDE_E	Lig_E1570	Xray_E101	0.545455	Y
PDE_E	Lig_E1571	Xray_E74	0.604651	Y
PDE_E	Lig_E1572	Xray_E63	0.764706	Y
PDE_E	Lig_E1573	Xray_E105	0.95	Y
PDE_E	Lig_E1574	Xray_E74	0.619048	Y
PDE_E	Lig_E1575	Xray_E74	0.565217	Y
PDE_E	Lig_E1576	Xray_E37	0.777778	Y
PDE_E	Lig_E1577	Xray_E37	0.717949	Y
PDE_E	Lig_E1578	NA	NA	N
PDE_E	Lig_E1579	Xray_E37	0.717949	Y
PDE_E	Lig_E1580	Xray_E101	0.545455	Y
PDE_E	Lig_E1581	NA	NA	N
PDE_E	Lig_E1582	Xray_E59	0.681818	Y
PDE_E	Lig_E1583	Xray_E74	0.604651	Y
PDE_E	Lig_E1584	Xray_E37	0.777778	Y
PDE_E	Lig_E1585	Xray_E63	0.722222	Y
PDE_E	Lig_E1586	Xray_E74	0.780488	Y
PDE_E	Lig_E1587	Xray_E74	0.604651	Y
PDE_E	Lig_E1588	Xray_E108	0.913043	Y
PDE_E	Lig_E1589	Xray_E73	0.666667	Y
PDE_E	Lig_E1590	Xray_E17	0.711111	Y
PDE_E	Lig_E1591	Xray_E17	0.653061	Y
PDE_E	Lig_E1592	Xray_E73	0.651163	Y
PDE_E	Lig_E1593	Xray_E17	0.711111	Y
PDE_E	Lig_E1594	Xray_E63	0.764706	Y
PDE_E	Lig_E1595	Xray_E73	0.682927	Y
PDE_E	Lig_E1596	Xray_E63	0.702703	Y
PDE_E	Lig_E1597	Xray_E37	0.717949	Y
PDE_E	Lig_E1598	Xray_E37	0.717949	Y
PDE_E	Lig_E1599	NA	NA	N
PDE_E	Lig_E1600	Xray_E73	0.666667	Y
PDE_E	Lig_E1601	Xray_E73	0.666667	Y
PDE_E	Lig_E1602	Xray_E74	0.604651	Y
PDE_E	Lig_E1603	NA	NA	N
PDE_E	Lig_E1604	NA	NA	N
PDE_E	Lig_E1605	Xray_E63	0.742857	Y
PDE_E	Lig_E1606	Xray_E63	0.6	Y
PDE_E	Lig_E1607	Xray_E81	0.711111	Y
PDE_E	Lig_E1608	NA	NA	N
PDE_E	Lig_E1609	Xray_E39	0.666667	Y
PDE_E	Lig_E1610	Xray_E39	0.764706	Y
PDE_E	Lig_E1611	Xray_E39	0.702703	Y
PDE_E	Lig_E1612	NA	NA	N
PDE_E	Lig_E1613	NA	NA	N
PDE_E	Lig_E1614	Xray_E74	0.634146	Y
PDE_E	Lig_E1615	Xray_E102	0.5	Y
PDE_E	Lig_E1616	Xray_E73	0.666667	Y
PDE_E	Lig_E1617	Xray_E73	0.666667	Y
PDE_E	Lig_E1618	Xray_E84	0.842105	Y
PDE_E	Lig_E1619	NA	NA	N
PDE_E	Lig_E1620	Xray_E74	0.619048	Y
PDE_E	Lig_E1621	Xray_E74	0.590909	Y
PDE_E	Lig_E1622	Xray_E74	0.577778	Y
PDE_E	Lig_E1623	Xray_E74	0.590909	Y
PDE_E	Lig_E1624	NA	NA	N
PDE_E	Lig_E1625	NA	NA	N
PDE_E	Lig_E1626	Xray_E17	0.695652	Y
PDE_E	Lig_E1627	NA	NA	N
PDE_E	Lig_E1628	NA	NA	N
PDE_E	Lig_E1629	Xray_E68	0.708333	Y
PDE_E	Lig_E1630	Xray_E68	0.708333	Y
PDE_E	Lig_E1631	NA	NA	N
PDE_E	Lig_E1632	NA	NA	N
PDE_E	Lig_E1633	Xray_E92	0.869565	Y
PDE_E	Lig_E1634	Xray_E92	0.869565	Y
PDE_E	Lig_E1635	Xray_E92	0.851064	Y
PDE_E	Lig_E1636	Xray_E92	0.851064	Y
PDE_E	Lig_E1637	Xray_E73	0.666667	Y
PDE_E	Lig_E1638	Xray_E101	0.533333	Y
PDE_E	Lig_E1639	Xray_E101	0.533333	Y
PDE_E	Lig_E1640	NA	NA	N
PDE_E	Lig_E1641	NA	NA	N
PDE_E	Lig_E1642	NA	NA	N
PDE_E	Lig_E1643	Xray_E17	0.680851	Y
PDE_E	Lig_E1644	NA	NA	N
PDE_E	Lig_E1645	Xray_E74	0.604651	Y
PDE_E	Lig_E1646	NA	NA	N
PDE_E	Lig_E1647	NA	NA	N
PDE_E	Lig_E1648	NA	NA	N
PDE_E	Lig_E1649	Xray_E17	0.680851	Y
PDE_E	Lig_E1650	NA	NA	N
PDE_E	Lig_E1651	Xray_E74	0.634146	Y
PDE_E	Lig_E1652	NA	NA	N
PDE_E	Lig_E1653	NA	NA	N
PDE_E	Lig_E1654	NA	NA	N
PDE_E	Lig_E1655	Xray_E63	0.742857	Y
PDE_E	Lig_E1656	Xray_E39	0.666667	Y
PDE_E	Lig_E1657	Xray_E39	0.705882	Y
PDE_E	Lig_E1658	Xray_E39	0.705882	Y
PDE_E	Lig_E1659	NA	NA	N
PDE_E	Lig_E1660	NA	NA	N
PDE_E	Lig_E1661	NA	NA	N
PDE_E	Lig_E1662	NA	NA	N
PDE_E	Lig_E1663	NA	NA	N
PDE_E	Lig_E1664	Xray_E39	0.764706	Y
PDE_E	Lig_E1665	Xray_E39	0.702703	Y
PDE_E	Lig_E1666	Xray_E39	0.702703	Y
PDE_E	Lig_E1667	NA	NA	N
PDE_E	Lig_E1668	NA	NA	N
PDE_E	Lig_E1669	NA	NA	N
PDE_E	Lig_E1670	NA	NA	N
PDE_E	Lig_E1671	NA	NA	N
PDE_E	Lig_E1672	Xray_E37	0.7	Y
PDE_E	Lig_E1673	NA	NA	N
PDE_E	Lig_E1674	NA	NA	N
PDE_E	Lig_E1675	NA	NA	N
PDE_E	Lig_E1676	NA	NA	N
PDE_E	Lig_E1677	Xray_E74	0.619048	Y
PDE_E	Lig_E1678	Xray_E74	0.577778	Y
PDE_E	Lig_E1679	NA	NA	N
PDE_E	Lig_E1680	NA	NA	N
PDE_E	Lig_E1681	Xray_E74	0.604651	Y
PDE_E	Lig_E1682	Xray_E37	0.777778	Y
PDE_E	Lig_E1683	NA	NA	N
PDE_E	Lig_E1684	NA	NA	N
PDE_E	Lig_E1685	Xray_E39	0.896552	Y
PDE_E	Lig_E1686	Xray_E97	0.590909	Y
PDE_E	Lig_E1687	Xray_E81	0.711111	Y
PDE_E	Lig_E1688	Xray_E81	0.711111	Y
PDE_E	Lig_E1689	Xray_E17	0.680851	Y
PDE_E	Lig_E1690	Xray_E17	0.680851	Y
PDE_E	Lig_E1691	Xray_E37	0.717949	Y
PDE_E	Lig_E1692	NA	NA	N
PDE_E	Lig_E1693	Xray_E99	0.68	Y
PDE_E	Lig_E1694	Xray_E63	0.571429	Y
PDE_E	Lig_E1695	NA	NA	N
PDE_E	Lig_E1696	NA	NA	N
PDE_E	Lig_E1697	Xray_E73	0.636364	Y
PDE_E	Lig_E1698	Xray_E74	0.590909	Y
PDE_E	Lig_E1699	Xray_E73	0.636364	Y
PDE_E	Lig_E1700	Xray_E109	0.938776	Y
PDE_E	Lig_E1701	Xray_E111	0.938776	Y
PDE_E	Lig_E1702	Xray_E63	0.736842	Y
PDE_E	Lig_E1703	Xray_E73	0.583333	Y
PDE_E	Lig_E1704	NA	NA	N
PDE_E	Lig_E1705	Xray_E39	0.684211	Y
PDE_E	Lig_E1706	NA	NA	N
PDE_E	Lig_E1707	Xray_E73	0.636364	Y
PDE_E	Lig_E1708	NA	NA	N
PDE_E	Lig_E1709	Xray_E108	0.893617	Y
PDE_E	Lig_E1710	Xray_E39	0.666667	Y
PDE_E	Lig_E1711	NA	NA	N
PDE_E	Lig_E1712	Xray_E73	0.636364	Y
PDE_E	Lig_E1713	NA	NA	N
PDE_E	Lig_E1714	Xray_E109	0.92	Y
PDE_E	Lig_E1715	NA	NA	N
PDE_E	Lig_E1716	NA	NA	N
PDE_E	Lig_E1717	Xray_E92	0.8	Y
PDE_E	Lig_E1718	Xray_E63	0.684211	Y
PDE_E	Lig_E1719	Xray_E74	0.577778	Y
PDE_E	Lig_E1720	Xray_E68	0.809524	Y
PDE_E	Lig_E1721	Xray_E110	0.711111	Y
PDE_E	Lig_E1722	Xray_E110	0.711111	Y
PDE_E	Lig_E1723	Xray_E39	0.702703	Y
PDE_E	Lig_E1724	NA	NA	N
PDE_E	Lig_E1725	Xray_E110	0.695652	Y
PDE_E	Lig_E1726	Xray_E110	0.695652	Y
PDE_E	Lig_E1727	NA	NA	N
PDE_E	Lig_E1728	NA	NA	N
PDE_E	Lig_E1729	Xray_E101	0.631579	Y
PDE_E	Lig_E1730	NA	NA	N
PDE_E	Lig_E1731	NA	NA	N
PDE_E	Lig_E1732	Xray_E74	0.565217	Y
PDE_E	Lig_E1733	Xray_E109	0.901961	Y
PDE_E	Lig_E1734	Xray_E63	0.684211	Y
PDE_E	Lig_E1735	Xray_E108	0.893617	Y
PDE_E	Lig_E1736	Xray_E13	0.727273	Y
PDE_E	Lig_E1737	Xray_E74	0.577778	Y
PDE_E	Lig_E1738	Xray_E110	0.893617	Y
PDE_E	Lig_E1739	Xray_E110	0.893617	Y
PDE_E	Lig_E1740	Xray_E110	0.893617	Y
PDE_E	Lig_E1741	NA	NA	N
PDE_E	Lig_E1742	Xray_E68	0.723404	Y
PDE_E	Lig_E1743	Xray_E68	0.723404	Y
PDE_E	Lig_E1744	NA	NA	N
PDE_E	Lig_E1745	Xray_E73	0.636364	Y
PDE_E	Lig_E1746	Xray_E89	0.711111	Y
PDE_E	Lig_E1747	Xray_E89	0.711111	Y
PDE_E	Lig_E1748	NA	NA	N
PDE_E	Lig_E1749	Xray_E79	0.571429	Y
PDE_E	Lig_E1750	Xray_E79	0.56	Y
PDE_E	Lig_E1751	NA	NA	N
PDE_E	Lig_E1752	Xray_E110	0.869565	Y
PDE_E	Lig_E1753	Xray_E110	0.869565	Y
PDE_E	Lig_E1754	Xray_E24	0.54902	Y
PDE_E	Lig_E1755	NA	NA	N
PDE_E	Lig_E1756	Xray_E68	0.772727	Y
PDE_E	Lig_E1757	NA	NA	N
PDE_E	Lig_E1758	Xray_E24	0.583333	Y
PDE_E	Lig_E1759	NA	NA	N
PDE_E	Lig_E1760	Xray_E24	0.583333	Y
PDE_E	Lig_E1761	NA	NA	N
PDE_E	Lig_E1762	NA	NA	N
PDE_E	Lig_E1763	Xray_E24	0.595745	Y
PDE_E	Lig_E1764	NA	NA	N
PDE_E	Lig_E1765	NA	NA	N
PDE_E	Lig_E1766	NA	NA	N
PDE_E	Lig_E1767	NA	NA	N
PDE_E	Lig_E1768	Xray_E74	0.565217	Y
PDE_E	Lig_E1769	NA	NA	N
PDE_E	Lig_E1770	NA	NA	N
PDE_E	Lig_E1771	Xray_E111	0.875	Y
PDE_E	Lig_E1772	NA	NA	N
PDE_E	Lig_E1773	Xray_E73	0.636364	Y
PDE_E	Lig_E1774	Xray_E78	0.744186	Y
PDE_E	Lig_E1775	Xray_E78	0.744186	Y
PDE_E	Lig_E1776	Xray_E78	0.744186	Y
PDE_E	Lig_E1777	Xray_E78	0.744186	Y
PDE_E	Lig_E1778	NA	NA	N
PDE_E	Lig_E1779	NA	NA	N
PDE_E	Lig_E1780	NA	NA	N
PDE_E	Lig_E1781	Xray_E97	0.577778	Y
PDE_E	Lig_E1782	Xray_E97	0.577778	Y
PDE_E	Lig_E1783	NA	NA	N
PDE_E	Lig_E1784	Xray_E92	0.8	Y
PDE_E	Lig_E1785	Xray_E92	0.8	Y
PDE_E	Lig_E1786	Xray_E73	0.636364	Y
PDE_E	Lig_E1787	Xray_E73	0.636364	Y
PDE_E	Lig_E1788	NA	NA	N
PDE_E	Lig_E1789	NA	NA	N
PDE_E	Lig_E1790	NA	NA	N
PDE_E	Lig_E1791	Xray_E111	0.916667	Y
PDE_E	Lig_E1792	NA	NA	N
PDE_E	Lig_E1793	Xray_E111	0.916667	Y
PDE_E	Lig_E1794	NA	NA	N
PDE_E	Lig_E1795	NA	NA	N
PDE_E	Lig_E1796	NA	NA	N
PDE_E	Lig_E1797	NA	NA	N
PDE_E	Lig_E1798	NA	NA	N
PDE_E	Lig_E1799	NA	NA	N
PDE_E	Lig_E1800	NA	NA	N
PDE_E	Lig_E1801	NA	NA	N
PDE_E	Lig_E1802	NA	NA	N
PDE_E	Lig_E1803	NA	NA	N
PDE_E	Lig_E1804	NA	NA	N
PDE_E	Lig_E1805	NA	NA	N
PDE_E	Lig_E1806	NA	NA	N
PDE_E	Lig_E1807	NA	NA	N
PDE_E	Lig_E1808	NA	NA	N
PDE_E	Lig_E1809	NA	NA	N
PDE_E	Lig_E1810	NA	NA	N
PDE_E	Lig_E1811	NA	NA	N
PDE_E	Lig_E1812	NA	NA	N
PDE_E	Lig_E1813	NA	NA	N
PDE_E	Lig_E1814	NA	NA	N
PDE_E	Lig_E1815	NA	NA	N
PDE_E	Lig_E1816	NA	NA	N
PDE_E	Lig_E1817	NA	NA	N
PDE_E	Lig_E1818	NA	NA	N
PDE_E	Lig_E1819	NA	NA	N
PDE_E	Lig_E1820	NA	NA	N
PDE_E	Lig_E1821	NA	NA	N
PDE_E	Lig_E1822	NA	NA	N
PDE_E	Lig_E1823	NA	NA	N
PDE_E	Lig_E1824	Xray_E108	0.893617	Y
PDE_E	Lig_E1825	NA	NA	N
PDE_E	Lig_E1826	NA	NA	N
PDE_E	Lig_E1827	Xray_E95	0.622222	Y
PDE_E	Lig_E1828	NA	NA	N
PDE_E	Lig_E1829	NA	NA	N
PDE_E	Lig_E1830	NA	NA	N
PDE_E	Lig_E1831	NA	NA	N
PDE_E	Lig_E1832	Xray_E111	0.916667	Y
PDE_E	Lig_E1833	NA	NA	N
PDE_E	Lig_E1834	NA	NA	N
PDE_E	Lig_E1835	NA	NA	N
PDE_E	Lig_E1836	NA	NA	N
PDE_E	Lig_E1837	NA	NA	N
PDE_E	Lig_E1838	NA	NA	N
PDE_E	Lig_E1839	NA	NA	N
PDE_E	Lig_E1840	NA	NA	N
PDE_E	Lig_E1841	NA	NA	N
PDE_E	Lig_E1842	NA	NA	N
PDE_E	Lig_E1843	NA	NA	N
PDE_E	Lig_E1844	NA	NA	N
PDE_E	Lig_E1845	NA	NA	N
PDE_E	Lig_E1846	NA	NA	N
PDE_E	Lig_E1847	NA	NA	N
PDE_E	Lig_E1848	NA	NA	N
PDE_E	Lig_E1849	NA	NA	N
PDE_F	Lig_F1	NA	NA	N
PDE_F	Lig_F2	Xray_F1	0.571429	Y
PDE_F	Lig_F3	Xray_F7	0.578947	Y
PDE_F	Lig_F4	NA	NA	N
PDE_F	Lig_F5	Xray_F7	0.578947	Y
PDE_F	Lig_F6	NA	NA	N
PDE_F	Lig_F7	NA	NA	N
PDE_F	Lig_F8	NA	NA	N
PDE_F	Lig_F9	NA	NA	N
PDE_F	Lig_F10	Xray_F27	0.6	Y
PDE_F	Lig_F11	NA	NA	N
PDE_F	Lig_F12	NA	NA	N
PDE_F	Lig_F13	Xray_F5	0.809524	Y
PDE_F	Lig_F14	NA	NA	N
PDE_F	Lig_F15	NA	NA	N
PDE_F	Lig_F16	Xray_F69	0.666667	Y
PDE_F	Lig_F17	NA	NA	N
PDE_F	Lig_F18	NA	NA	N
PDE_F	Lig_F19	NA	NA	N
PDE_F	Lig_F20	NA	NA	N
PDE_F	Lig_F21	NA	NA	N
PDE_F	Lig_F22	NA	NA	N
PDE_F	Lig_F23	NA	NA	N
PDE_F	Lig_F24	NA	NA	N
PDE_F	Lig_F25	Xray_F4	0.65	Y
PDE_F	Lig_F26	NA	NA	N
PDE_F	Lig_F27	NA	NA	N
PDE_F	Lig_F28	Xray_F12	0.97561	Y
PDE_F	Lig_F29	NA	NA	N
PDE_F	Lig_F30	Xray_F10	0.816327	Y
PDE_F	Lig_F31	Xray_F10	0.816327	Y
PDE_F	Lig_F32	Xray_F10	0.8	Y
PDE_F	Lig_F33	Xray_F10	0.769231	Y
PDE_F	Lig_F34	Xray_F12	0.608696	Y
PDE_F	Lig_F35	Xray_F18	0.897959	Y
PDE_F	Lig_F36	Xray_F10	0.754717	Y
PDE_F	Lig_F37	NA	NA	N
PDE_F	Lig_F38	Xray_F17	0.830189	Y
PDE_F	Lig_F39	Xray_F10	0.769231	Y
PDE_F	Lig_F40	Xray_F10	0.947368	Y
PDE_F	Lig_F41	Xray_F13	0.604651	Y
PDE_F	Lig_F42	Xray_F12	0.583333	Y
PDE_F	Lig_F43	NA	NA	N
PDE_F	Lig_F44	NA	NA	N
PDE_F	Lig_F45	NA	NA	N
PDE_F	Lig_F46	NA	NA	N
PDE_F	Lig_F47	NA	NA	N
PDE_F	Lig_F48	Xray_F26	0.72	Y
PDE_F	Lig_F49	Xray_F10	0.792453	Y
PDE_F	Lig_F50	NA	NA	N
PDE_F	Lig_F51	NA	NA	N
PDE_F	Lig_F52	Xray_F10	0.763636	Y
PDE_F	Lig_F53	NA	NA	N
PDE_F	Lig_F54	NA	NA	N
PDE_F	Lig_F55	Xray_F26	0.72	Y
PDE_F	Lig_F56	NA	NA	N
PDE_F	Lig_F57	Xray_F26	0.6	Y
PDE_F	Lig_F58	Xray_F26	0.625	Y
PDE_F	Lig_F59	Xray_F28	0.84	Y
PDE_F	Lig_F60	Xray_F26	0.588235	Y
PDE_F	Lig_F61	Xray_F61	0.625	Y
PDE_F	Lig_F62	Xray_F17	0.814815	Y
PDE_F	Lig_F63	Xray_F17	0.814815	Y
PDE_F	Lig_F64	Xray_F17	0.814815	Y
PDE_F	Lig_F65	Xray_F17	0.862745	Y
PDE_F	Lig_F66	Xray_F17	0.846154	Y
PDE_F	Lig_F67	Xray_F17	0.862745	Y
PDE_F	Lig_F68	Xray_F17	0.862745	Y
PDE_F	Lig_F69	Xray_F17	0.862745	Y
PDE_F	Lig_F70	Xray_F17	0.830189	Y
PDE_F	Lig_F71	Xray_F2	0.595745	Y
PDE_F	Lig_F72	NA	NA	N
PDE_F	Lig_F73	Xray_F61	0.638298	Y
PDE_F	Lig_F74	Xray_F61	0.652174	Y
PDE_F	Lig_F75	Xray_F32	0.54902	Y
PDE_F	Lig_F76	Xray_F32	0.583333	Y
PDE_F	Lig_F77	Xray_F35	0.590909	Y
PDE_F	Lig_F78	NA	NA	N
PDE_F	Lig_F79	NA	NA	N
PDE_F	Lig_F80	Xray_F28	0.84	Y
PDE_F	Lig_F81	Xray_F28	0.792453	Y
PDE_F	Lig_F82	Xray_F28	0.608696	Y
PDE_F	Lig_F83	Xray_F28	0.84	Y
PDE_F	Lig_F84	NA	NA	N
PDE_F	Lig_F85	NA	NA	N
PDE_F	Lig_F86	Xray_F10	0.75	Y
PDE_F	Lig_F87	Xray_F26	0.566038	Y
PDE_F	Lig_F88	NA	NA	N
PDE_F	Lig_F89	Xray_F10	0.545455	Y
PDE_F	Lig_F90	NA	NA	N
PDE_F	Lig_F91	Xray_F8	0.682927	Y
PDE_F	Lig_F92	Xray_F34	0.961538	Y
PDE_F	Lig_F93	Xray_F10	0.736842	Y
PDE_F	Lig_F94	Xray_F35	0.913043	Y
PDE_F	Lig_F95	Xray_F35	0.913043	Y
PDE_F	Lig_F96	Xray_F10	0.555556	Y
PDE_F	Lig_F97	Xray_F26	0.625	Y
PDE_F	Lig_F98	Xray_F35	0.913043	Y
PDE_F	Lig_F99	Xray_F10	0.6	Y
PDE_F	Lig_F100	Xray_F35	0.638298	Y
PDE_F	Lig_F101	NA	NA	N
PDE_F	Lig_F102	Xray_F33	0.625	Y
PDE_F	Lig_F103	NA	NA	N
PDE_F	Lig_F104	Xray_F13	0.511628	Y
PDE_F	Lig_F105	NA	NA	N
PDE_F	Lig_F106	Xray_F10	0.576923	Y
PDE_F	Lig_F107	Xray_F35	0.913043	Y
PDE_F	Lig_F108	Xray_F35	0.913043	Y
PDE_F	Lig_F109	NA	NA	N
PDE_F	Lig_F110	Xray_F35	0.913043	Y
PDE_F	Lig_F111	Xray_F35	0.638298	Y
PDE_F	Lig_F112	Xray_F35	0.913043	Y
PDE_F	Lig_F113	Xray_F32	0.595745	Y
PDE_F	Lig_F114	Xray_F35	0.893617	Y
PDE_F	Lig_F115	Xray_F35	0.893617	Y
PDE_F	Lig_F116	Xray_F51	0.829268	Y
PDE_F	Lig_F117	Xray_F18	0.916667	Y
PDE_F	Lig_F118	Xray_F54	0.705882	Y
PDE_F	Lig_F119	Xray_F61	0.666667	Y
PDE_F	Lig_F120	Xray_F51	0.772727	Y
PDE_F	Lig_F121	Xray_F34	0.943396	Y
PDE_F	Lig_F122	Xray_F46	0.923077	Y
PDE_F	Lig_F123	Xray_F46	0.857143	Y
PDE_F	Lig_F124	Xray_F34	0.943396	Y
PDE_F	Lig_F125	Xray_F34	0.77551	Y
PDE_F	Lig_F126	Xray_F26	0.612245	Y
PDE_F	Lig_F127	Xray_F32	0.595745	Y
PDE_F	Lig_F128	Xray_F61	0.697674	Y
PDE_F	Lig_F129	NA	NA	N
PDE_F	Lig_F130	Xray_F28	0.84	Y
PDE_F	Lig_F131	Xray_F10	0.612245	Y
PDE_F	Lig_F132	Xray_F51	0.829268	Y
PDE_F	Lig_F133	Xray_F10	0.576923	Y
PDE_F	Lig_F134	NA	NA	N
PDE_F	Lig_F135	Xray_F10	0.612245	Y
PDE_F	Lig_F136	Xray_F10	0.625	Y
PDE_F	Lig_F137	Xray_F46	0.837209	Y
PDE_F	Lig_F138	Xray_F33	0.612245	Y
PDE_F	Lig_F139	Xray_F33	0.576923	Y
PDE_F	Lig_F140	Xray_F48	0.961538	Y
PDE_F	Lig_F141	Xray_F46	0.9	Y
PDE_F	Lig_F142	Xray_F51	0.755556	Y
PDE_F	Lig_F143	Xray_F45	0.622222	Y
PDE_F	Lig_F144	NA	NA	N
PDE_F	Lig_F145	Xray_F34	0.943396	Y
PDE_F	Lig_F146	Xray_F34	0.943396	Y
PDE_F	Lig_F147	Xray_F33	0.588235	Y
PDE_F	Lig_F148	Xray_F58	0.622222	Y
PDE_F	Lig_F149	Xray_F10	0.6	Y
PDE_F	Lig_F150	Xray_F18	0.88	Y
PDE_F	Lig_F151	Xray_F2	0.622222	Y
PDE_F	Lig_F152	Xray_F47	0.734694	Y
PDE_F	Lig_F153	Xray_F47	0.734694	Y
PDE_F	Lig_F154	NA	NA	N
PDE_F	Lig_F155	Xray_F61	0.666667	Y
PDE_F	Lig_F156	Xray_F51	0.755556	Y
PDE_F	Lig_F157	Xray_F10	0.576923	Y
PDE_F	Lig_F158	Xray_F10	0.535714	Y
PDE_F	Lig_F159	Xray_F10	0.535714	Y
PDE_F	Lig_F160	Xray_F47	0.692308	Y
PDE_F	Lig_F161	Xray_F47	0.692308	Y
PDE_F	Lig_F162	Xray_F48	0.77551	Y
PDE_F	Lig_F163	Xray_F48	0.961538	Y
PDE_F	Lig_F164	Xray_F48	0.961538	Y
[truncated: 7,841 more rows]
